# Supplementary material for: Al2O3 promoted mechanochemical nucleophilic aromatic substitution
Source: Royal Society of Chemistry journal article supplement (doi:10.1039/d4mr00039k), 2024-01-01

# Supporting Information

## **Al<sub>2</sub>O<sub>3</sub> promoted mechanochemical nucleophilic aromatic substitution**

Luca Vaghi, Eva Palomba, Antonio Papagni

University of Milano-Bicocca, Department of Materials Science, via R. Cozzi 55, 20125 Milano.

### **Table of Contents**

**S2.** Images of the work-up procedure

**S3.** Synthetic procedures and compounds characterization

**S13.** Scale-up experiment

**S14.** NMR and IR spectra

## Images of the work-up procedure

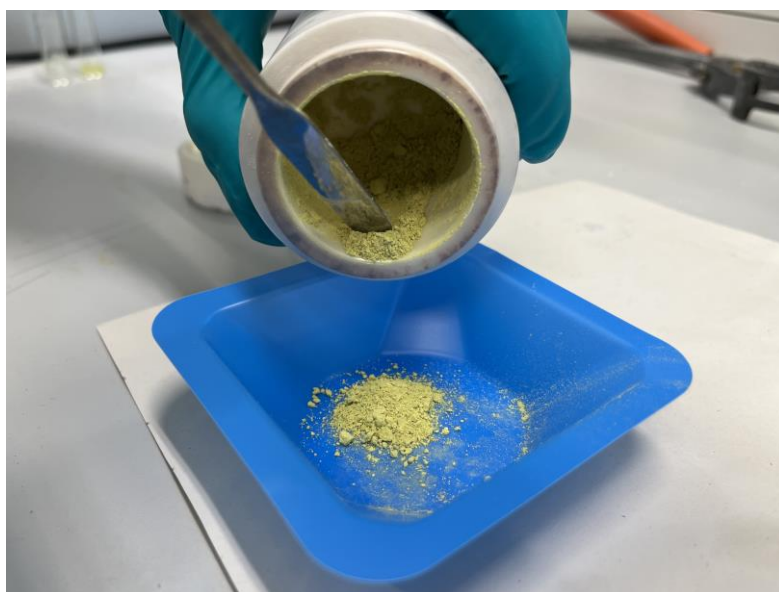

**Figure S1.** Crude recovery from the milling reactor.

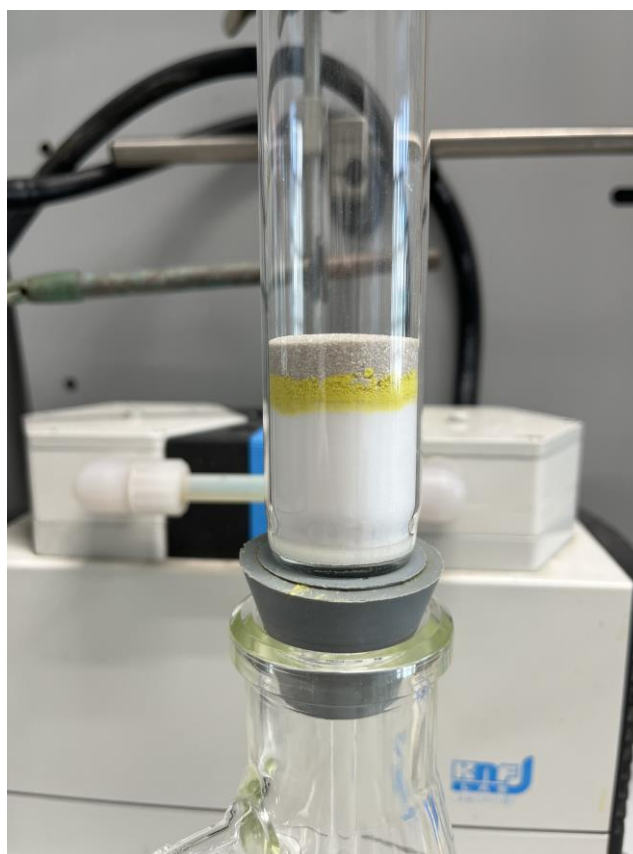

**Figure S2.** Setup for the purification on silica pad.

## Synthetic procedures and compounds characterization

### General information

All reagents and solvents were purchased from commercial sources and used without further purification. Reactions were performed in a SPEX® 8000M mixer/mill using 50 mL grinding reactor (ZrO<sub>2</sub>) and 4 milling balls (1 cm diameter, ZrO<sub>2</sub>). The following materials were used as milling auxiliaries: SiO<sub>2</sub> (Sigma-Aldrich 717177); TiO<sub>2</sub> (Sigma-Aldrich 14021); Al<sub>2</sub>O<sub>3</sub> (Sigma-Aldrich 11028). Chromatographic purifications were performed using Merck 9385 silica gel, pore size 60 Å (230–400 mesh). Melting points were measured with a Stanford Research Systems Optimelt apparatus. <sup>1</sup>H, <sup>13</sup>C and <sup>19</sup>F spectra were recorded with a Bruker AVANCE III HD 400 MHz spectrometer (<sup>1</sup>H: 400 MHz, <sup>13</sup>C: 101 MHz, <sup>19</sup>F 376 MHz) chemical shifts (δ) are expressed in parts per million (ppm), and coupling constants are given in Hz. Splitting patterns are indicated as follows: s = singlet, d = doublet, t = triplet, q = quartet, m = multiplet, br = broad. IR spectra were recorded with a PerkinElmer Spectrum 100 FT-IR spectrometer equipped with universal ATR sampling accessory. Elemental analyses were obtained with an Elementar vario MICRO cube instrument.

### General Procedure for the mechanochemical S<sub>N</sub>Ar of aryl fluorides

Aryl fluoride (2 mmol), nucleophile (equivalents stated in the text) and auxiliary (5 g) were added to the zirconia reactor equipped with four zirconia milling balls (d=1 cm). The mixture was shaken at 15 Hz for the time stated in the text. The powdery residue was recovered and directly put over a short pad of silica gel (a small amount of silica gel can be mixed before to the residue if elution results difficult), vacuum-aided elution with the proper solvent mixture and subsequent removal of the volatiles under reduced pressure afforded the desired product in a pure form.

### Isolated compounds

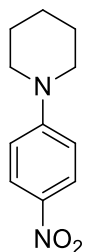

1-(4-nitrophenyl)piperidine (**3a**). 376 mg, 91%; yellow solid; mp 103-105°C; *R<sub>f</sub>* = 0.35 (SiO<sub>2</sub>, *n*-heptane/EtOAc 8:2); <sup>1</sup>H NMR (400 MHz, CDCl<sub>3</sub>) δ 8.13 – 8.07 (m, 2H), 6.82 – 6.75 (m, 2H), 3.46 – 3.41 (m, 4H), 1.73 – 1.65 (m, 6H); <sup>13</sup>C NMR (101 MHz, CDCl<sub>3</sub>) δ 154.9, 137.4, 126.1, 112.3, 48.3, 25.3, 24.2. The physical and spectroscopic data are in accordance with those reported in the literature.<sup>1</sup>

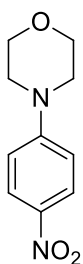

4-(4-nitrophenyl)morpholine (**3b**). 401 mg, 96%; yellow solid; mp 150-151 °C;  $R_f = 0.33$  (SiO<sub>2</sub>, EtOAc/*n*-heptane 1:1); <sup>1</sup>H NMR (400 MHz, CDCl<sub>3</sub>) δ 8.15 – 8.10 (m, 2H), 6.85 – 6.79 (m, 2H), 3.88 – 3.83 (m, 4H), 3.39 – 3.34 (m, 4H); <sup>13</sup>C NMR (101 MHz, CDCl<sub>3</sub>) δ 155.0, 138.9, 125.9, 112.6, 66.3, 47.1. The physical and spectroscopic data are in accordance with those reported in the literature.<sup>2</sup>

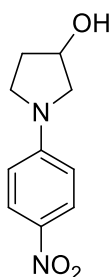

1-(4-nitrophenyl)pyrrolidin-3-ol (**3c**). 333 mg, 80%; yellow solid; mp 180-181 °C;  $R_f = 0.55$  (SiO<sub>2</sub>, *n*-heptane/EtOAc 8:2); <sup>1</sup>H NMR (400 MHz, DMSO-*d*<sub>6</sub>) δ 8.08 – 8.02 (m, 2H), 6.64 – 6.58 (m, 2H), 5.10 (d,  $J = 3.6$  Hz, 1H), 4.47 – 4.40 (m, 1H), 3.54 – 3.43 (m, 3H), 3.25 (d,  $J = 11.2$  Hz, 1H), 2.12 – 2.00 (m, 1H), 1.99 – 1.90 (m, 1H); <sup>13</sup>C NMR (101 MHz, DMSO-*d*<sub>6</sub>) δ 152.0, 135.3, 126.0, 110.8, 69.0, 56.2, 45.9, 33.4; IR (ATR): 3436, 3110, 3089, 2949, 2921, 2857, 2666, 2556, 2391, 1603, 1570, 1522, 1471, 1438, 1406, 1365, 1293, 1225, 1194, 1163, 1100, 977, 952, 868, 820, 753, 728, 693, 681, 625, 544 cm<sup>-1</sup>; Anal. Calcd. for C<sub>10</sub>H<sub>12</sub>N<sub>2</sub>O<sub>3</sub>: C, 57.69; H, 5.81; N, 13.45. Found: C, 57.58; H, 5.83; N, 13.50.

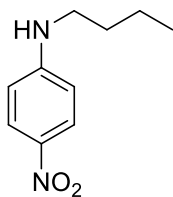

*N*-butyl-4-nitroaniline (**3d**). 124 mg, 32%; yellow solid; mp 55-56 °C;  $R_f = 0.26$  (SiO<sub>2</sub>, *n*-heptane/EtOAc 8:2); <sup>1</sup>H NMR (400 MHz, CDCl<sub>3</sub>) δ 8.10 – 8.04 (m, 2H), 6.54 – 6.47 (m, 2H), 4.50 (s, 1H), 3.21 (td,  $J = 7.1, 5.5$  Hz, 2H), 1.69 – 1.56 (m, 2H), 1.50 – 1.38 (m, 2H), 0.97 (t,  $J = 7.3$  Hz, 3H); <sup>13</sup>C NMR (101 MHz, CDCl<sub>3</sub>) δ 153.6, 137.5, 126.5, 110.9, 43.1, 31.1, 20.1, 13.8. The physical and spectroscopic data are in accordance with those reported in the literature.<sup>3</sup>

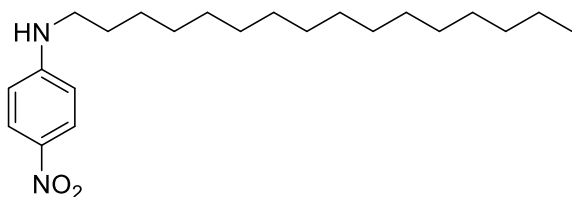

*N*-hexadecyl-4-nitroaniline (**3e**). 24 mg, 3%; yellow solid; mp 74-75 °C;  $R_f = 0.38$  (SiO<sub>2</sub>, *n*-heptane/EtOAc 8:2); <sup>1</sup>H NMR (400 MHz, CDCl<sub>3</sub>) δ 8.11 – 8.05 (m, 2H), 6.54 – 6.48 (m, 2H), 4.46 (s, 1H), 3.25 – 3.16 (m, 2H), 1.72 – 1.57 (m, 4H), 1.43 – 1.20 (m, 24H), 0.88 (t,  $J = 6.8$  Hz, 3H); <sup>13</sup>C NMR (101 MHz, CDCl<sub>3</sub>) δ 153.4, 137.8, 126.5, 110.9, 43.4, 31.9, 29.91 – 29.20 (m, 10C), 29.1, 27.0, 22.7, 14.1; IR (ATR): 3348, 2956, 2915, 2848, 1637, 1603, 1541, 1469, 1439, 1362, 1319, 1294, 1284, 1270, 1186, 1153, 1134, 1108, 1000, 839, 753, 723, 700, 662, 546 cm<sup>-1</sup>; Anal. Calcd. for C<sub>22</sub>H<sub>38</sub>N<sub>2</sub>O<sub>2</sub>: C, 72.88; H, 10.56; N, 7.73. Found: C, 73.01; H, 10.64; N, 7.68.

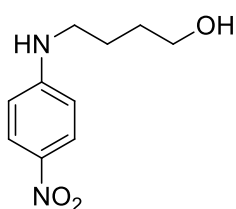

4-[(4-nitrophenyl)amino]butan-1-ol (**3h**). 220 mg, 52%; yellow solid; mp 135-136 °C;  $R_f = 0.40$  (SiO<sub>2</sub>, EtOAc/*n*-heptane 8:2); <sup>1</sup>H NMR (400 MHz, DMSO-*d*<sub>6</sub>) δ 7.98 (d,  $J = 9.3$  Hz, 2H), 7.28 (t,  $J = 5.4$  Hz, 1H), 6.66 – 6.59 (m, 2H), 4.45 (t,  $J = 5.1$  Hz, 1H), 3.44 (dd,  $J = 11.4, 6.3$  Hz, 2H), 3.14 (dd,  $J = 12.5, 6.9$  Hz, 2H), 1.65 – 1.46 (m, 4H); <sup>13</sup>C NMR (101 MHz, DMSO-*d*<sub>6</sub>) δ 155.1, 135.9, 126.7, 111.1, 60.8, 42.7, 30.4, 25.5; IR (ATR): 3440, 3274, 3174, 3124, 2936, 2892, 2863, 1599, 1590, 1542, 1506, 1476, 1462, 1286, 1270, 1178, 1132, 1104, 1057, 1030, 996, 833, 753, 742, 697, 662, 628, 544 cm<sup>-1</sup>; Anal. Calcd. for C<sub>10</sub>H<sub>14</sub>N<sub>2</sub>O<sub>3</sub>: C, 57.13; H, 6.71; N, 13.33. Found: C, 57.22; H, 6.68; N, 13.31.

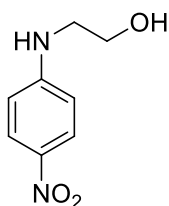

2-[(4-nitrophenyl)amino]ethanol (**3i**). 227 mg, 62%; yellow solid; mp 109-110 °C;  $R_f = 0.34$  (SiO<sub>2</sub>, EtOAc/*n*-heptane 1:1); <sup>1</sup>H NMR (400 MHz, DMSO-*d*<sub>6</sub>) δ 7.98 (d,  $J = 9.3$  Hz, 2H), 7.29 (t,  $J = 5.5$  Hz, 1H), 6.66 (d,  $J = 9.4$  Hz, 2H), 4.82 (t,  $J = 5.4$  Hz, 1H), 3.58 (q,  $J = 5.7$  Hz, 2H), 3.24 (q,  $J = 5.7$  Hz, 2H); <sup>13</sup>C NMR (101 MHz, DMSO-*d*<sub>6</sub>) δ 155.2, 136.0, 126.7, 111.2, 59.7, 45.5. The physical and spectroscopic data are in accordance with those reported in the literature.<sup>4</sup>

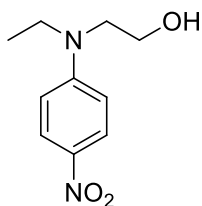

2-[ethyl(4-nitrophenyl)amino]ethanol (**3j**). 17 mg, 4%; yellow solid; mp 67-68 °C;  $R_f$  = 0.29 (SiO<sub>2</sub>, EtOAc/*n*-heptane 1:1); <sup>1</sup>H NMR (400 MHz, CDCl<sub>3</sub>) δ 7.96 – 7.90 (m, 2H), 6.60 – 6.54 (m, 2H), 3.81 (t,  $J$  = 6.0 Hz, 2H), 3.53 (t,  $J$  = 6.0 Hz, 2H), 3.48 (q,  $J$  = 7.3 Hz, 2H), 2.86 (s, 1H), 1.17 (t,  $J$  = 7.1 Hz, 3H); <sup>13</sup>C NMR (101 MHz, CDCl<sub>3</sub>) δ 153.0, 136.1, 126.4, 110.3, 59.7, 52.3, 46.0, 11.8; IR (ATR): 3398, 3155, 2971, 2933, 2903, 2873, 2681, 2406, 1594, 1579, 1517, 1490, 1478, 1468, 1438, 1412, 1391, 1374, 1355, 1305, 1280, 1224, 1198, 1188, 1134, 1113, 1081, 1073, 1035, 1021, 997, 951, 848, 823, 809, 796, 778, 750, 695, 633, 619, 564, 532 cm<sup>-1</sup>; Anal. Calcd. for C<sub>10</sub>H<sub>14</sub>N<sub>2</sub>O<sub>3</sub>: C, 57.13; H, 6.71; N, 13.33. Found: C, 57.27; H, 6.70; N, 13.28.

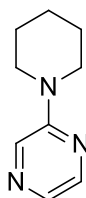

2-piperidin-1-ylpyrazine (**5a**). 274 mg, 84%; yellow solid; mp 35-36 °C;  $R_f$  = 0.20 (SiO<sub>2</sub>, *n*-heptane/EtOAc 8:2); <sup>1</sup>H NMR (400 MHz, CDCl<sub>3</sub>) δ 8.10 (d,  $J$  = 1.5 Hz, 1H), 8.00 (dd,  $J$  = 2.6, 1.6 Hz, 1H), 7.74 (d,  $J$  = 2.6 Hz, 1H), 3.58 – 3.50 (m, 4H), 1.68 – 1.57 (m, 6H); <sup>13</sup>C NMR (101 MHz, CDCl<sub>3</sub>) δ 155.1, 141.7, 131.9, 131.1, 45.5, 25.3, 24.5. The physical and spectroscopic data are in accordance with those reported in the literature.<sup>5</sup>

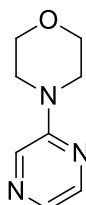

4-pyrazin-2-ylmorpholine (**5b**). 227 mg, 69%; pale grey solid; mp 46-47 °C,  $R_f$  = 0.23 (SiO<sub>2</sub>, *n*-heptane/EtOAc 1:1); <sup>1</sup>H NMR (400 MHz, CDCl<sub>3</sub>) δ 8.11 (d,  $J$  = 1.5 Hz, 1H), 8.06 (dd,  $J$  = 2.6, 1.6 Hz, 1H), 7.88 (d,  $J$  = 2.6 Hz, 1H), 3.84 – 3.79 (m, 4H), 3.57 – 3.52 (m, 4H); <sup>13</sup>C NMR (101 MHz, CDCl<sub>3</sub>) δ 155.0, 141.7, 133.5, 130.9, 66.5, 44.7. The physical and spectroscopic data are in accordance with those reported in the literature.<sup>6</sup>

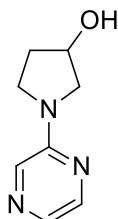

1-pyrazin-2-ylpyrrolidin-3-ol (**5c**). 284 mg, 86%; pale grey solid; mp 87-88 °C;  $R_f$  = 0.17 (SiO<sub>2</sub>, EtOAc); <sup>1</sup>H NMR (400 MHz, CDCl<sub>3</sub>) δ 7.98 (dd,  $J$  = 2.7, 1.5 Hz, 1H), 7.80 (d,  $J$  = 1.5 Hz, 1H), 7.72 (d,  $J$  = 2.7 Hz, 1H), 4.63 – 4.57 (m, 1H), 3.66 – 3.48 (m, 4H), 3.38 (s, 1H),

2.15 – 2.07 (m, 2H);  $^{13}\text{C}$  NMR (101 MHz,  $\text{CDCl}_3$ )  $\delta$  153.0, 142.2, 131.0, 130.3, 70.3, 54.8, 44.4, 33.9; IR (ATR): 3235, 3048, 2954, 2919, 2861, 1580, 1516, 1493, 1465, 1438, 1379, 1352, 1319, 1296, 1255, 1224, 1204, 1180, 1128, 1109, 1075, 1009, 994, 968, 915, 871, 826, 716, 623, 536  $\text{cm}^{-1}$ ; Anal. Calcd. for  $\text{C}_8\text{H}_{11}\text{N}_3\text{O}$ : C, 58.17; H, 6.71; N, 25.44. Found: C, 58.17; H, 6.70; N, 25.42.

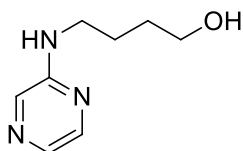

4-(pyrazin-2-ylamino)butan-1-ol (**5h**). 209 mg, 63%; Colorless oil;  $R_f$  = 0.28 ( $\text{SiO}_2$ , EtOAc/EtOH 9:1);  $^1\text{H}$  NMR (400 MHz,  $\text{CDCl}_3$ )  $\delta$  7.84 (dd,  $J$  = 2.8, 1.5 Hz, 1H), 7.78 (d,  $J$  = 1.4 Hz, 1H), 7.62 (d,  $J$  = 2.8 Hz, 1H), 5.48 (t,  $J$  = 5.4 Hz, 1H), 3.99 (s, 1H), 3.59 (t,  $J$  = 6.1 Hz, 2H), 3.32 – 3.23 (m, 2H), 1.69 – 1.52 (m, 4H);  $^{13}\text{C}$  NMR (101 MHz,  $\text{CDCl}_3$ )  $\delta$  154.8, 141.8, 132.2, 132.0, 62.0, 41.1, 29.8, 25.9; IR (ATR): 3289, 2936, 2864, 1596, 1519, 1464, 1434, 1397, 1342, 1292, 1204, 1179, 1151, 1105, 1057, 1001, 914, 872, 822, 753, 623, 536  $\text{cm}^{-1}$ ; Anal. Calcd. for  $\text{C}_8\text{H}_{13}\text{N}_3\text{O}$ : C, 57.46; H, 7.84; N, 25.13. Found: C, 57.61; H, 7.78; N, 25.09.

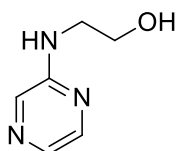

2-(pyrazin-2-ylamino)ethanol (**5i**). 168 mg, 61%; pale ochre solid; mp 55-56  $^\circ\text{C}$ ;  $R_f$  = 0.31 ( $\text{SiO}_2$ , EtOAc/EtOH 9:1);  $^1\text{H}$  NMR (400 MHz,  $\text{CDCl}_3$ )  $\delta$  7.86 (dd,  $J$  = 2.8, 1.5 Hz, 1H), 7.84 (d,  $J$  = 1.5 Hz, 1H), 7.68 (d,  $J$  = 2.8 Hz, 1H), 5.59 (s, 1H), 4.49 (s, 1H), 3.80 – 3.74 (m, 2H), 3.51 – 3.44 (m, 2H);  $^{13}\text{C}$  NMR (101 MHz,  $\text{CDCl}_3$ )  $\delta$  154.9, 141.4, 132.9, 132.3, 61.8, 44.0; IR (ATR): 3272, 2925, 2864, 1595, 1519, 1464, 1434, 1397, 1342, 1292, 1204, 1179, 1151, 1105, 1057, 1001, 914, 872, 822, 753, 623, 536  $\text{cm}^{-1}$ ; Anal. Calcd. for  $\text{C}_6\text{H}_9\text{N}_3\text{O}$ : C, 51.79; H, 6.52; N, 30.20. Found: C, 51.88; H, 6.59; N, 30.07.

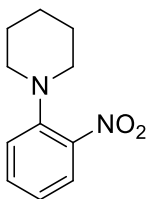

1-(2-nitrophenyl)piperidine (**6a**). 405 mg, 98%; orange solid; mp 78-79  $^\circ\text{C}$ ;  $R_f$  = 0.47 ( $\text{SiO}_2$ , *n*-heptane/EtOAc 8:2);  $^1\text{H}$  NMR (400 MHz,  $\text{CDCl}_3$ )  $\delta$  7.74 (dd,  $J$  = 8.1, 1.6 Hz, 1H), 7.46 – 7.40 (m, 1H), 7.11 (dd,  $J$  = 8.3, 0.8 Hz, 1H), 6.98 – 6.92 (m, 1H), 3.05 – 2.97 (m, 4H), 1.76 – 1.66 (m, 4H), 1.63 – 1.55 (m, 2H);  $^{13}\text{C}$  NMR (101 MHz,  $\text{CDCl}_3$ )  $\delta$  147.0, 142.7, 133.3, 126.0, 120.8, 120.6, 52.9, 25.9, 24.0. The physical and spectroscopic data are in accordance with those reported in the literature.<sup>7</sup>

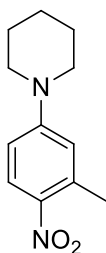

1-(3-methyl-4-nitrophenyl)piperidine (**8a**). 416 mg, 95%; yellow solid; mp 53-54 °C;  $R_f$  = 0.36 (SiO<sub>2</sub>, *n*-heptane/EtOAc 9:1); <sup>1</sup>H NMR (400 MHz, CDCl<sub>3</sub>) δ 8.04 (d,  $J$  = 9.3 Hz, 1H), 6.64 (dd,  $J$  = 9.3, 2.9 Hz, 1H), 6.58 (d,  $J$  = 2.8 Hz, 1H), 3.42 – 3.35 (m, 4H), 2.60 (s, 3H), 1.69 – 1.62 (m, 6H); <sup>13</sup>C NMR (101 MHz, CDCl<sub>3</sub>) δ 153.9, 137.9, 137.4, 127.9, 115.8, 110.9, 48.3, 25.3, 24.6, 22.7. The physical and spectroscopic data are in accordance with those reported in the literature.<sup>8</sup>

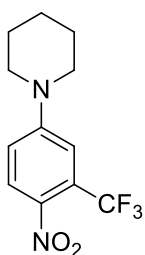

1-[4-nitro-3-(trifluoromethyl)phenyl]piperidine (**9a**). 544 mg, 99%; yellow solid; mp 71-72 °C;  $R_f$  = 0.44 (SiO<sub>2</sub>, *n*-heptane/EtOAc 8:2); <sup>1</sup>H NMR (400 MHz, CDCl<sub>3</sub>) δ 7.98 (d,  $J$  = 9.3 Hz, 1H), 7.10 (d,  $J$  = 2.7 Hz, 1H), 6.87 (dd,  $J$  = 9.3, 2.9 Hz, 1H), 3.48 – 3.40 (m, 4H), 1.73 – 1.64 (m, 6H); <sup>13</sup>C NMR (101 MHz, CDCl<sub>3</sub>) δ 153.3, 135.7, 128.9, 126.3 (q,  $J$  = 32.7 Hz), 122.46 (q,  $J$  = 273.3 Hz), 114.2, 111.8 (q,  $J$  = 6.4 Hz), 48.3, 25.2, 24.0; <sup>19</sup>F NMR (376 MHz, CDCl<sub>3</sub>) δ -60.20. The physical and spectroscopic data are in accordance with those reported in the literature.<sup>9</sup>

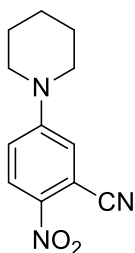

2-nitro-5-(1-piperidiny)benzonitrile (**10a**). 447 mg, 97%; yellow solid; mp 127-128 °C;  $R_f$  = 0.38 (SiO<sub>2</sub>, *n*-heptane/EtOAc 6:4); <sup>1</sup>H NMR (400 MHz, CDCl<sub>3</sub>) δ 8.15 (d,  $J$  = 9.6 Hz, 1H), 7.08 (d,  $J$  = 3.0 Hz, 1H), 6.93 (dd,  $J$  = 9.6, 3.0 Hz, 1H), 3.51 – 3.44 (m, 4H), 1.78 – 1.63 (m, 6H); <sup>13</sup>C NMR (101 MHz, CDCl<sub>3</sub>) δ 153.3, 136.1, 128.0, 118.5, 116.4, 114.9, 110.3, 48.2, 25.2, 23.9. The physical and spectroscopic data are in accordance with those reported in the literature.<sup>10</sup>



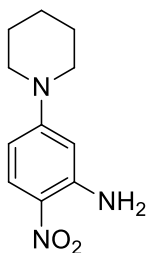

2-nitro-5-(1-piperidiny)aniline (**11a**). 385 mg, 87%; orange solid; mp 104-105 °C;  $R_f$  = 0.41 (SiO<sub>2</sub>, *n*-heptane/EtOAc 6:4); <sup>1</sup>H NMR (400 MHz, CDCl<sub>3</sub>) δ 7.97 (d,  $J$  = 9.7 Hz, 1H), 6.25 (dd,  $J$  = 9.8, 2.7 Hz, 1H), 6.16 (br s, 2H), 5.92 (d,  $J$  = 2.7 Hz, 1H), 3.45 – 3.26 (m, 4H), 1.73 – 1.55 (m, 6H); <sup>13</sup>C NMR (101 MHz, CDCl<sub>3</sub>) δ 155.4, 147.4, 128.3, 124.0, 105.8, 97.5, 48.2, 25.3, 24.3. The physical and spectroscopic data are in accordance with those reported in the literature.<sup>11</sup>

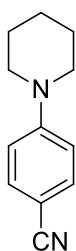

4-(1-piperidiny)benzotrile (**13a**). 140 mg, 38%; white solid; mp 52-53 °C;  $R_f$  = 0.32 (SiO<sub>2</sub>, *n*-heptane/EtOAc 9:1); <sup>1</sup>H NMR (400 MHz, CDCl<sub>3</sub>) δ 7.45 (d,  $J$  = 9.1 Hz, 2H), 6.83 (d,  $J$  = 9.0 Hz, 2H), 3.41 – 3.25 (m, 4H), 1.77 – 1.55 (m, 6H); <sup>13</sup>C NMR (101 MHz, CDCl<sub>3</sub>) δ 153.6, 133.5, 120.4, 114.0, 98.9, 48.4, 25.2, 24.2. The physical and spectroscopic data are in accordance with those reported in the literature.<sup>12</sup>

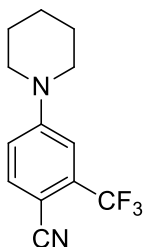

4-(1-piperidiny)-2-(trifluoromethyl)benzotrile (**14a**). 504 mg, 99%; white solid; mp 68-69 °C;  $R_f$  = 0.35 (SiO<sub>2</sub>, *n*-heptane/EtOAc 7:3); <sup>1</sup>H NMR (400 MHz, CDCl<sub>3</sub>) δ 7.56 (d,  $J$  = 8.8 Hz, 1H), 7.09 (d,  $J$  = 2.6 Hz, 1H), 6.92 (dd,  $J$  = 8.8, 2.6 Hz, 1H), 3.47 – 3.33 (m, 4H), 1.77 – 1.62 (m, 6H); <sup>13</sup>C NMR (101 MHz, CDCl<sub>3</sub>) δ 152.8, 136.0, 134.0 (q,  $J$  = 31.7 Hz), 122.8 (q,  $J$  = 274.1 Hz), 117.1, 115.4, 111.2 (q,  $J$  = 4.6 Hz), 95.2, 48.2, 25.1, 24.1; <sup>19</sup>F NMR (376 MHz, CDCl<sub>3</sub>) δ -62.41. The physical and spectroscopic data are in accordance with those reported in the literature.<sup>13</sup>

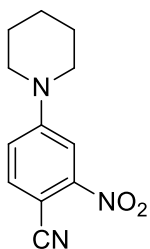

2-nitro-4-(1-piperidiny)benzonitrile (**15a**). 413 mg, 89%; orange solid; mp 142-143 °C;  $R_f$  = 0.33 (SiO<sub>2</sub>, *n*-heptane/EtOAc 6:4); <sup>1</sup>H NMR (400 MHz, CDCl<sub>3</sub>) δ 7.60 (d,  $J$  = 2.7 Hz, 1H), 7.58 (d,  $J$  = 8.9 Hz, 1H), 7.02 (dd,  $J$  = 8.9, 2.7 Hz, 1H), 3.52 – 3.35 (m, 4H), 1.79 – 1.64 (m, 6H); <sup>13</sup>C NMR (101 MHz, CDCl<sub>3</sub>) δ 153.1, 150.3, 136.2, 116.9, 116.6, 109.2, 92.7, 48.2, 25.1, 23.9. The physical and spectroscopic data are in accordance with those reported in the literature.<sup>14</sup>

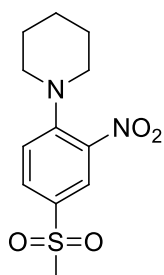

1-[4-(methylsulfonyl)-2-nitrophenyl]piperidine (**19a**). 548 mg, 96%; orange solid; mp 124-125 °C;  $R_f$  = 0.45 (SiO<sub>2</sub>, *n*-heptane/EtOAc 1:1); <sup>1</sup>H NMR (400 MHz, CDCl<sub>3</sub>) δ 8.27 (d,  $J$  = 2.3 Hz, 1H), 7.83 (dd,  $J$  = 8.9, 2.3 Hz, 1H), 7.14 (d,  $J$  = 9.0 Hz, 1H), 3.23 – 3.10 (m, 4H), 3.03 (s, 3H), 1.75 – 1.59 (m, 6H); <sup>13</sup>C NMR (101 MHz, CDCl<sub>3</sub>) δ 149.3, 138.6, 131.7, 128.9, 127.3, 120.2, 51.8, 44.7, 25.4, 23.6. The physical and spectroscopic data are in accordance with those reported in the literature.<sup>15</sup>

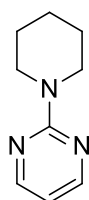

2-(1-piperidiny)pyrimidine (**20a**). 311 mg, 95%; colourless oil;  $R_f$  = 0.35 (SiO<sub>2</sub>, *n*-heptane/EtOAc 9:1); <sup>1</sup>H NMR (400 MHz, CDCl<sub>3</sub>) δ 8.20 (d,  $J$  = 4.7 Hz, 2H), 6.33 (t,  $J$  = 4.7 Hz, 1H), 3.75 – 3.66 (m, 4H), 1.65 – 1.45 (m, 6H); <sup>13</sup>C NMR (101 MHz, CDCl<sub>3</sub>) δ 161.6, 157.9, 109.0, 44.7, 25.7, 24.8. The physical and spectroscopic data are in accordance with those reported in the literature.<sup>16</sup>

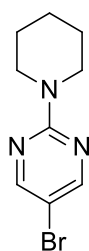

5-bromo-2-(1-piperidiny)pyrimidine (**21a**). 478 mg, 99%; white solid; mp 55-56 °C;  $R_f$  = 0.65 (SiO<sub>2</sub>, *n*-heptane/EtOAc 9:1); <sup>1</sup>H NMR (400 MHz, CDCl<sub>3</sub>) δ 8.20 (s, 2H), 3.73 – 3.63

(m, 6H), 1.67 – 1.45 (m, 6H);  $^{13}\text{C}$  NMR (101 MHz,  $\text{CDCl}_3$ )  $\delta$  159.8, 157.7, 104.8, 45.0, 25.6, 24.7. The physical and spectroscopic data are in accordance with those reported in the literature.<sup>17</sup>

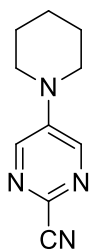

5-(1-piperidiny)-2-pyrimidinecarbonitrile (**22a**). 335 mg, 89%; white solid; mp 96-97 °C;  $R_f$  = 0.30 ( $\text{SiO}_2$ , *n*-heptane/EtOAc 7:3);  $^1\text{H}$  NMR (400 MHz,  $\text{CDCl}_3$ )  $\delta$  8.23 (s, 1H), 3.45 – 3.31 (m, 2H), 1.75 – 1.58 (m, 3H);  $^{13}\text{C}$  NMR (101 MHz,  $\text{CDCl}_3$ )  $\delta$  144.3, 141.5, 131.6, 116.8, 47.0, 24.9, 23.7; IR (ATR): 2939, 2850, 2229, 1558, 1523, 1465, 1451, 1442, 1371, 1291, 1239, 1211, 1128, 1023, 917, 890, 855, 800, 769, 654, 556  $\text{cm}^{-1}$ ; Anal. Calcd. for  $\text{C}_{10}\text{H}_{12}\text{N}_4$ : C, 63.81; H, 6.43; N, 29.77. Found: C, 63.90; H, 6.42; N, 29.71.

## References

- 1) A.-H. Khuthier, A.-K. S. Al-Kazzaz, J. M. A. Al-Rawi and M. A. Al-Iraqi, Studies of tertiary amine oxides. 4. Thermal rearrangement of *N*-aryl amine oxides to *O*-arylhydroxylamines, *J. Org. Chem.*, 1981, **46**, 3634–3638.
- 2) S. Pradhan, A. Bhattacharyya and R. P. John, A coordination driven supramolecular  $\text{Pd}_2\text{L}_4$  self-assembly as heterogeneous catalyst for Buchwald–Hartwig amination reaction, *Tetrahedron Lett.*, 2016, **57**, 1532–1536.
- 3) A. R. Katritzky and K. S. Laurenzo, Alkylaminonitrobenzenes by vicarious nucleophilic amination with 4-(alkylamino)-1,2,4-triazoles, *J. Org. Chem.*, 1988, **53**, 3978–3982.
- 4) A. C. Knipe and N. Sridhar, Synthesis of *N*-alkyl-2-(4-nitrophenoxy)-ethanamines. Intermediates in desulfonative double Smiles' rearrangement of *N*-alkyl-*N*-(2-hydroxyethyl)-4-nitrobenzenesulfonamides, *Synthesis*, 1976, **1976**, 606–607.
- 5) Y.-J. Cherng, Efficient nucleophilic substitution reactions of pyrimidyl and pyrazyl halides with nucleophiles under focused microwave irradiation, *Tetrahedron*, 2002, **58**, 887–890.
- 6) M. G. Organ, M. Abdel-Hadi, S. Avola, I. Dubovyk, N. Hadei, E. A. B. Kantchev, C. J. O'Brien, M. Sayah and C. Valente, Pd-Catalyzed Aryl Amination Mediated by Well Defined, *N*-Heterocyclic Carbene (NHC)–Pd Precatalysts, PEPPSI, *Chem. Eur. J.*, 2008, **14**, 2443–2452.
- 7) T. B. Nguyen, L. Ermolenko and A. Al-Mourabit, Formic acid as a sustainable and complementary reductant: an approach to fused benzimidazoles by molecular iodine-catalyzed reductive redox cyclization of *o*-nitro-*t*-anilines, *Green Chem.*, 2016, **18**, 2966–2970.

- 8) M. A. Yurovskaya, A. Z. Afanas'ev, V. A. Chertkov and Y. G. Bundel', Synthesis of indoles from pyridinium salts 5.\* Secondary amines in the reaction of 3-nitropyridinium salts with acetone, *Chem. Heterocycl. Compd. (N. Y.)*, 1988, **24**, 1000–1008.
- 9) N. Borlinghaus, T. N. Ansari, L. H. von Garrel, D. Ogulu, S. Handa, V. Wittmann and W. M. Braje, Nucleophilic aromatic substitution reactions under aqueous, mild conditions using polymeric additive HPMC, *Green Chem.*, 2021, **23**, 3955–3962.
- 10) E. F. Elslager, J. Clarke, L. M. Werbel, D. F. Worth and J. Davoll, Folate antagonists. 3. 2,4-Diamino-6-(heterocyclic)quinazolines, a novel class of antimetabolites with potent antimalarial and antibacterial activity, *J. Med. Chem.*, 1972, **15**, 827–836.
- 11) W. Yan, X. Wang, Y. Dai, B. Zhao, X. Yang, J. Fan, Y. Gao, F. Meng, Y. Wang, C. Luo, J. Ai, M. Geng and W. Duan, Discovery of 3-(5'-Substituted)-Benzimidazole-5-(1-(3,5-dichloropyridin-4-yl)ethoxy)-1*H*-indazoles as Potent Fibroblast Growth Factor Receptor Inhibitors: Design, Synthesis, and Biological Evaluation, *J. Med. Chem.*, 2016, **59**, 6690–6708.
- 12) H. Deol, G. Singh, M. Kumar and V. Bhalla, Phenazine-based donor acceptor systems as organic photocatalysts for “metal-free” C–N/C–C cross-coupling, *J. Org. Chem.*, 2020, **85**, 11080–11093.
- 13) I. Kinoyama, N. Taniguchi, T. Yoden, H. Koutoku, T. Furutani, M. Kudoh and M. Okada, Synthesis and pharmacological evaluation of novel arylpiperazine derivatives as nonsteroidal androgen receptor antagonists, *Chem. Pharm. Bull.*, 2004, **52**, 1330–1333.
- 14) C. W. N. Holmes and J. D. Loudon, 283. The mobility of groups in certain benzonitriles, *J. Chem. Soc.*, 1940, 1521–1525.
- 15) J. F. Bunnett, T. Kato and N. S. Nudelman, Kinetics of reactions of 4-substituted 2-nitrofluorobenzenes with piperidine in methanol, *J. Org. Chem.*, 1969, **34**, 785–788.
- 16) Y. B. Bhujabal, K. S. Vadagaonkar, A. Gholap, Y. S. Sanghvi, R. Dandela and A. R. Kapdi, HFIP promoted low-temperature S<sub>N</sub>Ar of chloroheteroarenes using thiols and amines, *J. Org. Chem.*, 2019, **84**, 15343–15354.
- 17) J. P. Geerts, H. C. van der Plas and A. van Veldhuizen, NMR studies on  $\sigma$  - adducts of heterocyclic systems with nucleophiles. VI—Carbon - 13 nuclear magnetic resonance investigations on  $\sigma$  - adduct formation of pyrimidine and some of its derivatives with potassium amide in liquid ammonia, *Org. Magn. Reson.*, 1975, **7**, 86–88.

## Scale-up experiment

### Procedure for the mechanochemical $S_NAr$ on 10 mmol of 1-fluoro-2-nitrobenzene **6**

1-Fluoro-2-nitrobenzene **6** (1.41 g, 10 mmol), piperidine **2a** (1.28 g, 15 mmol) and  $Al_2O_3$  (15 g) were added to the zirconia reactor (50 mL) equipped with four zirconia milling balls (d=1 cm). The mixture was shaken at 15 Hz for 1 h. The powdery residue was recovered, mixed with a small amount of silica gel and put directly over a pad of silica gel. Vacuum-aided elution with *n*-heptane/EtOAc 8:2 and subsequent removal of the volatiles under reduced pressure afforded **6a** (1.87 g, 91%) in a pure form.

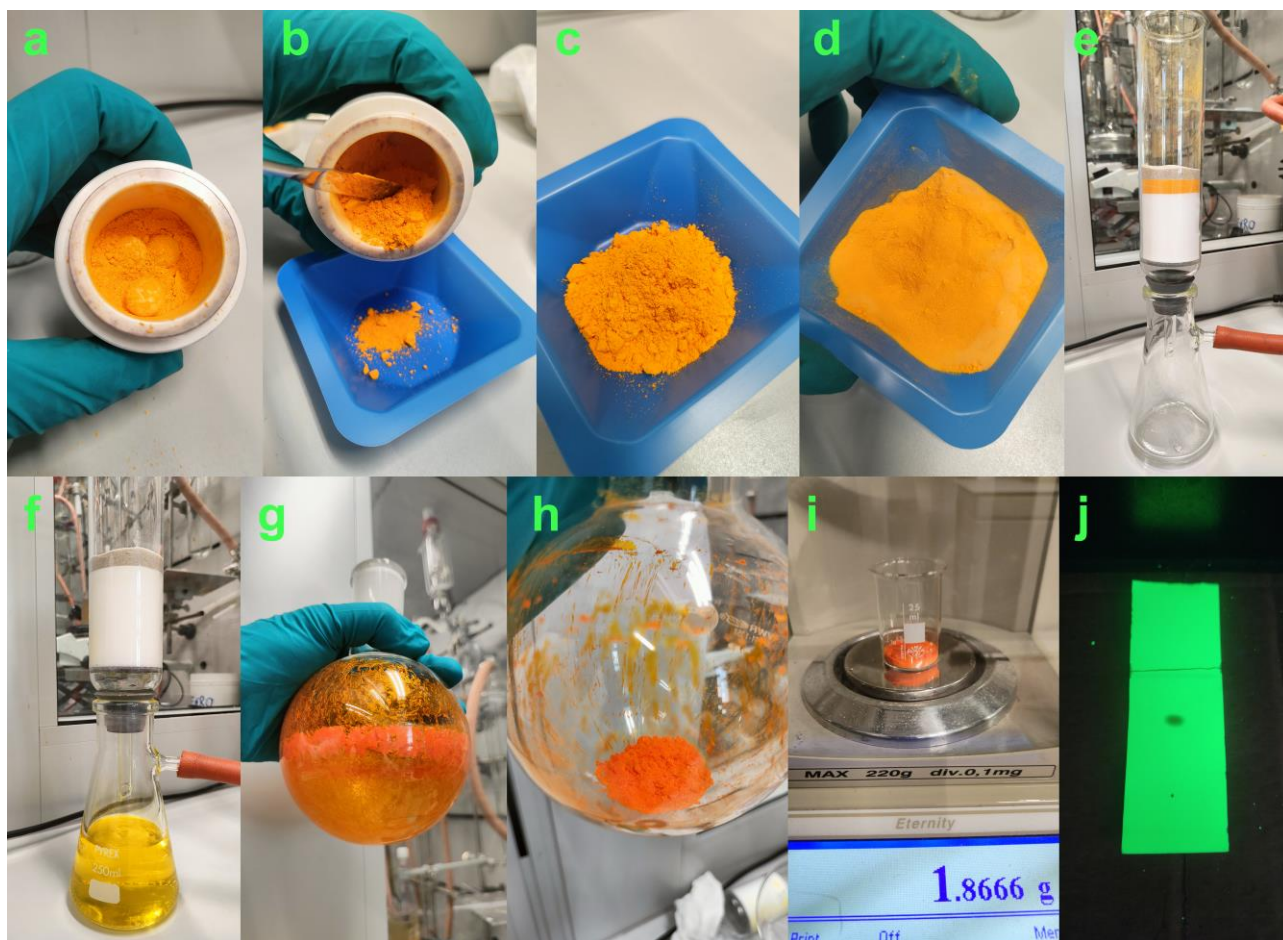

**Figure S3.** Image sequence of the scale-up experiment. a) aspect of the reactor at the end of the experiment; b) recovery of the crude from the jar; c) aspect of the crude; d) aspect of the crude after mixing with a small amount of silica gel; e) setup for purification via dry column chromatography; f) eluted fraction containing the product **6a**; g,h) aspect of the product **6a** after removal of the volatiles under reduced pressure; i) weighing; j) purity check via TLC analysis.

# NMR and IR spectra

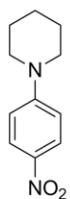

**3a**

8.11  
8.11  
8.10  
8.09  
8.08  
8.07

6.80  
6.80  
6.79  
6.77  
6.76

3.45  
3.43

1.69

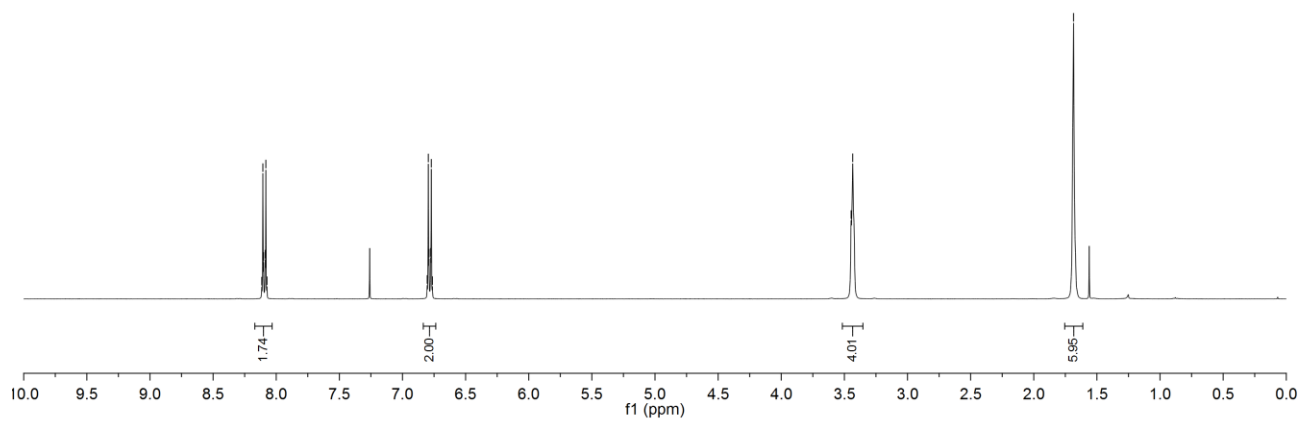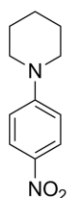

**3a**

154.9

137.4

126.1

112.3

48.3

25.3  
24.2

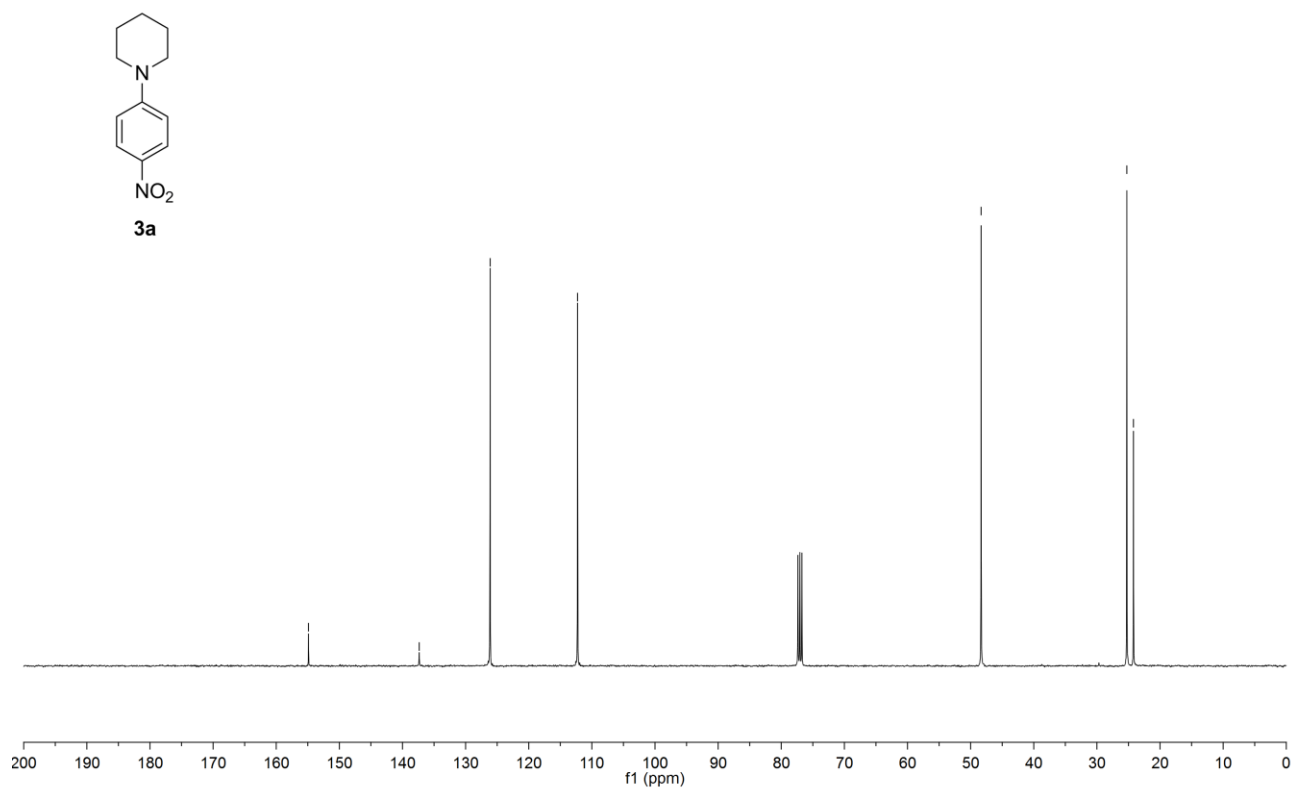

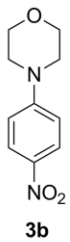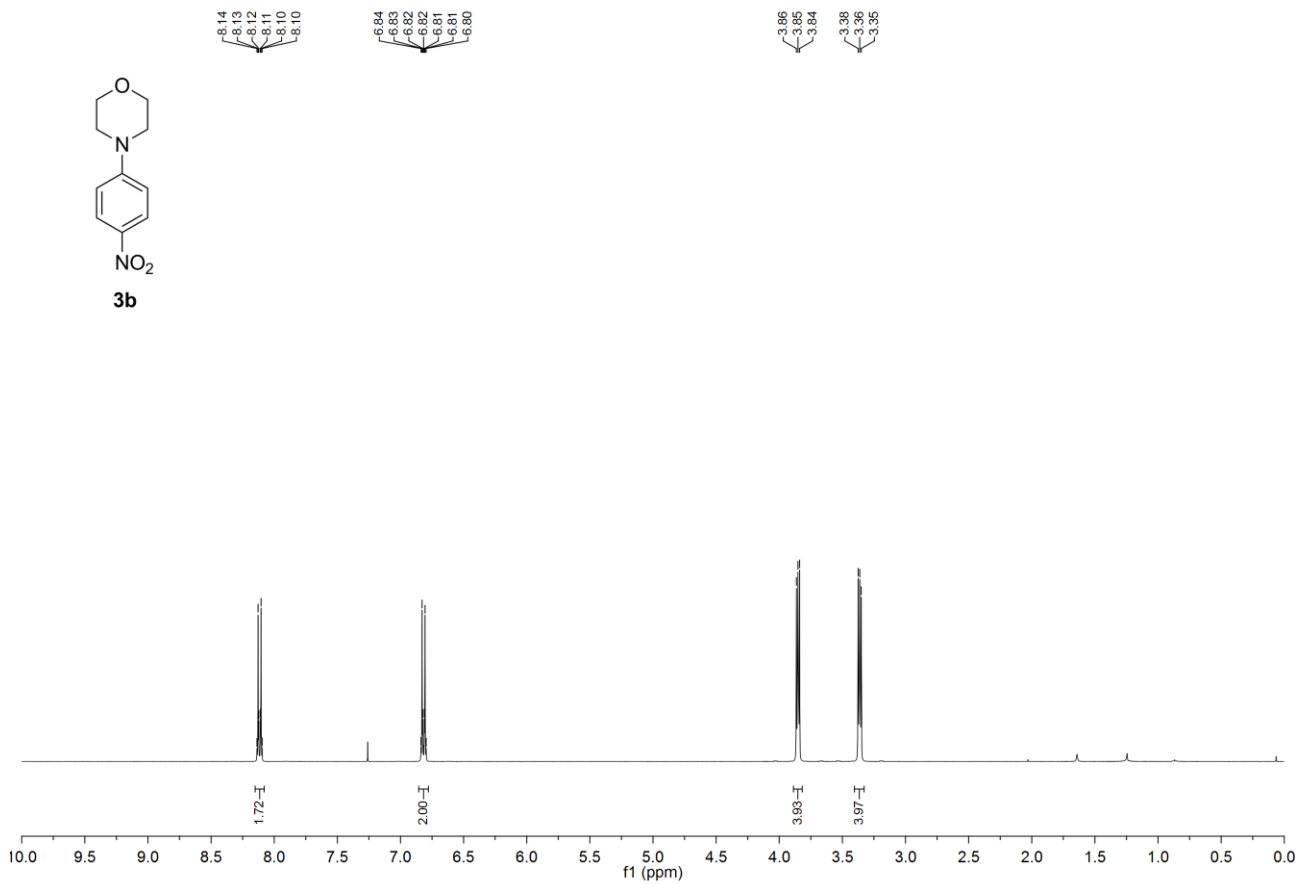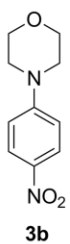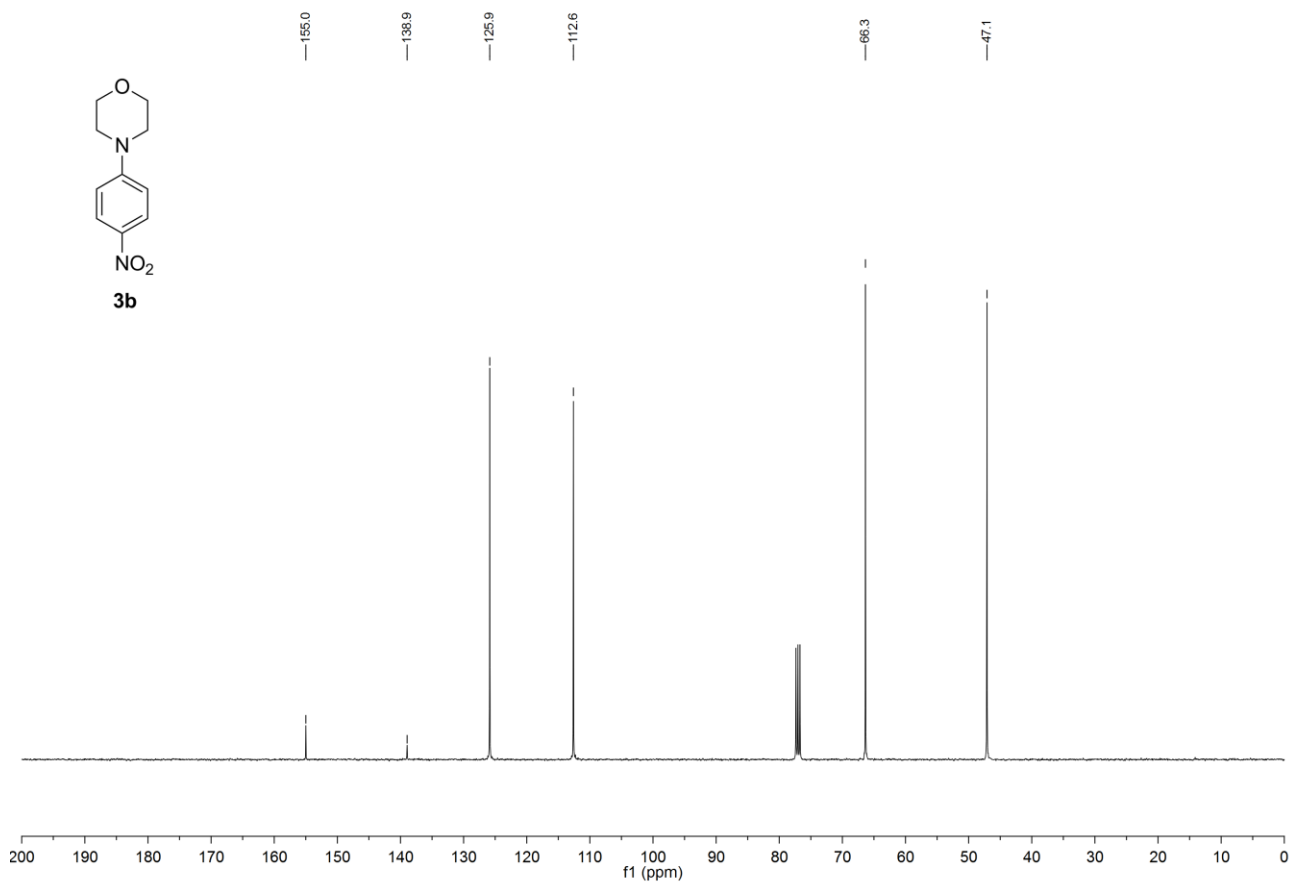

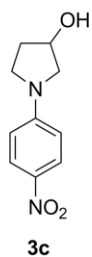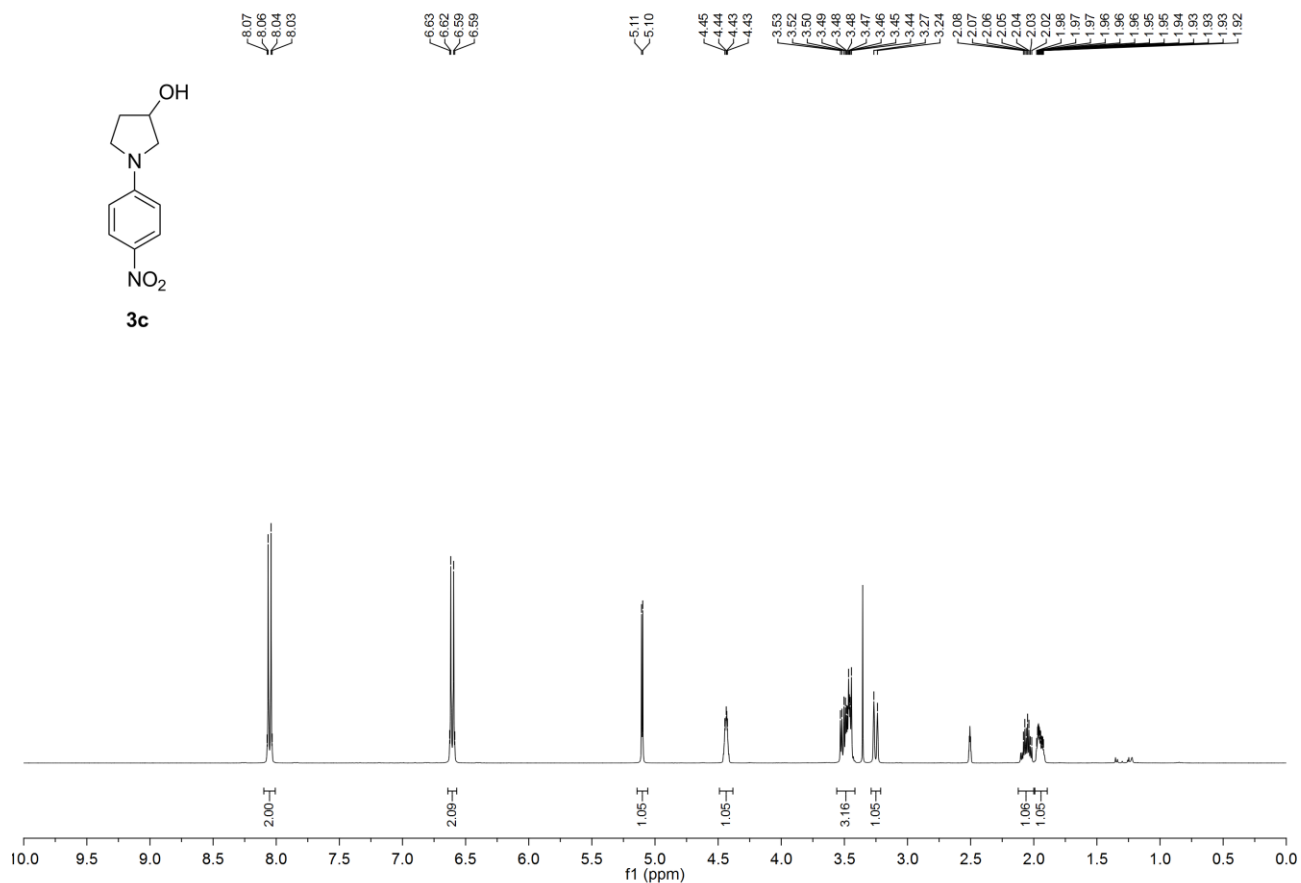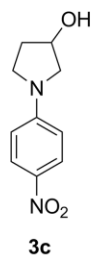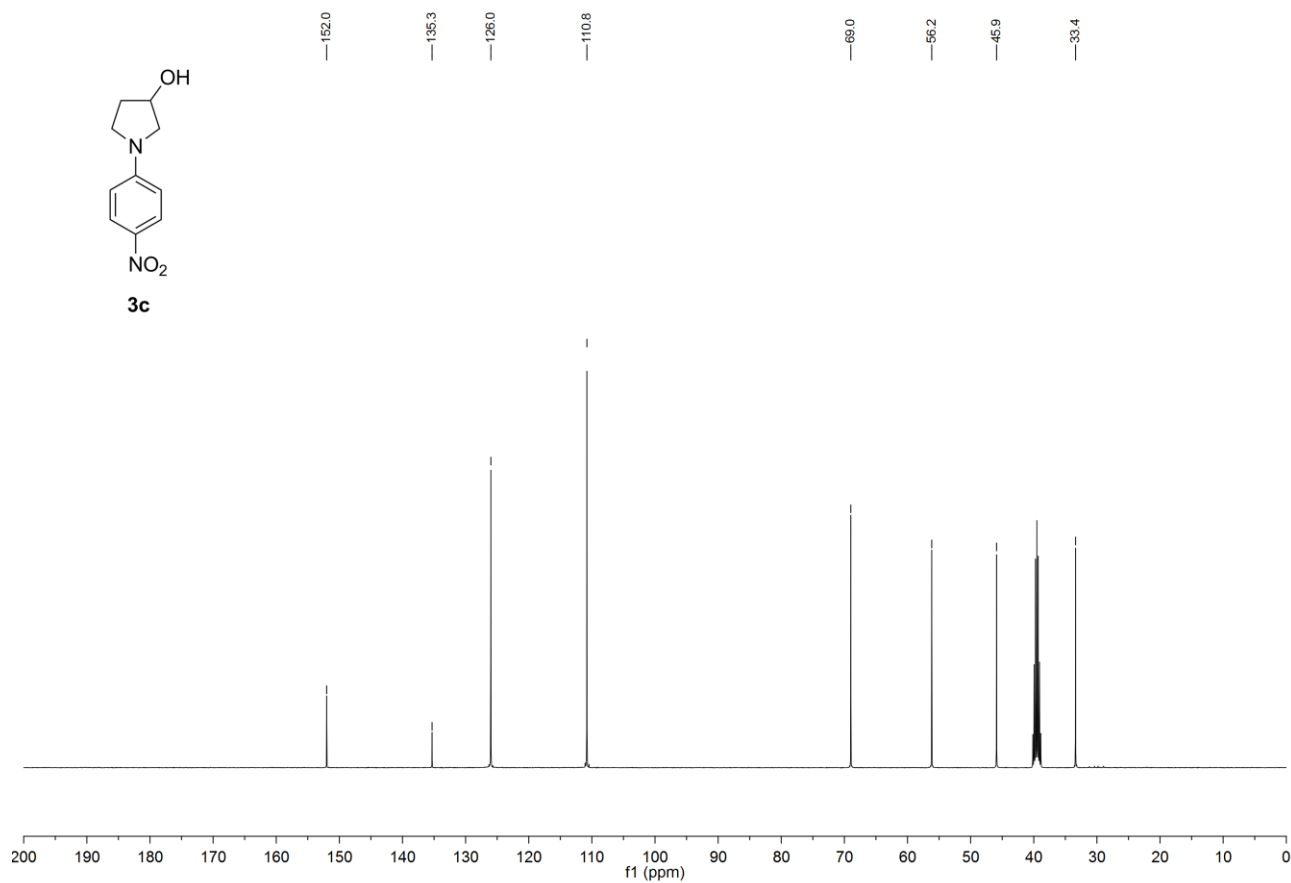



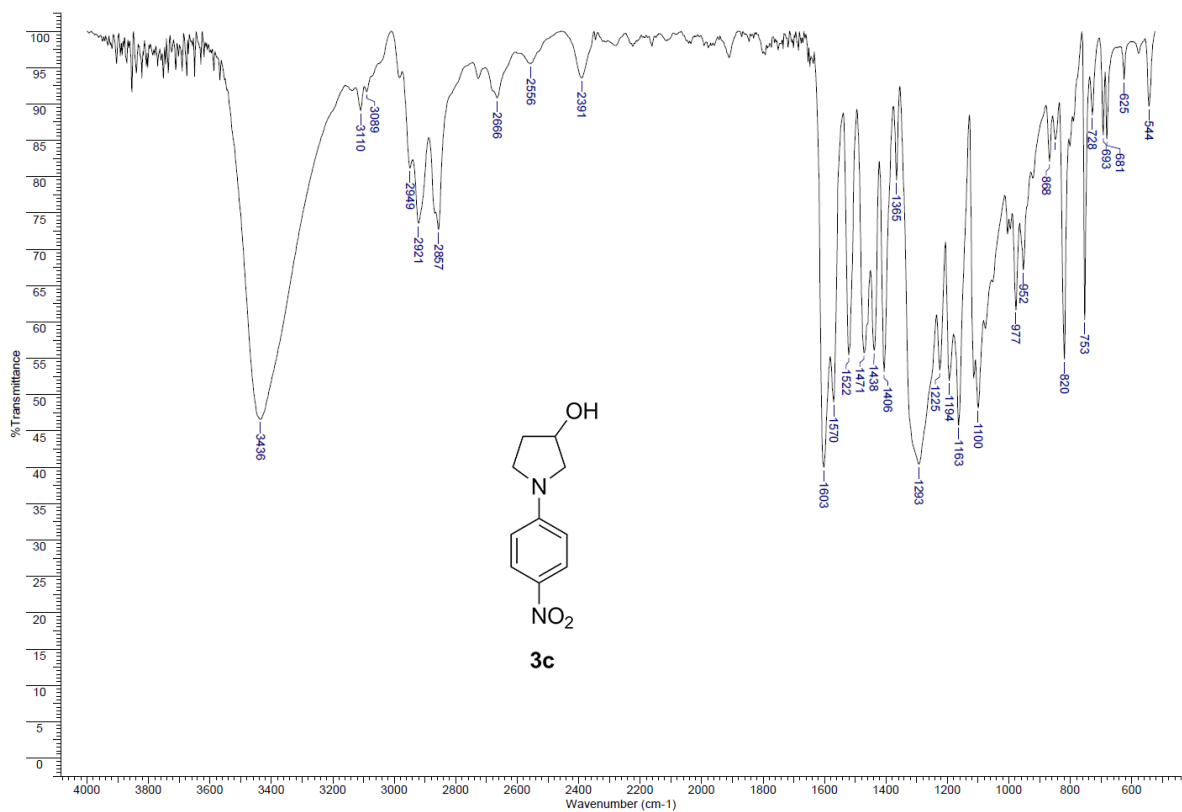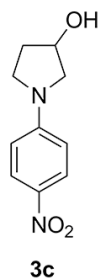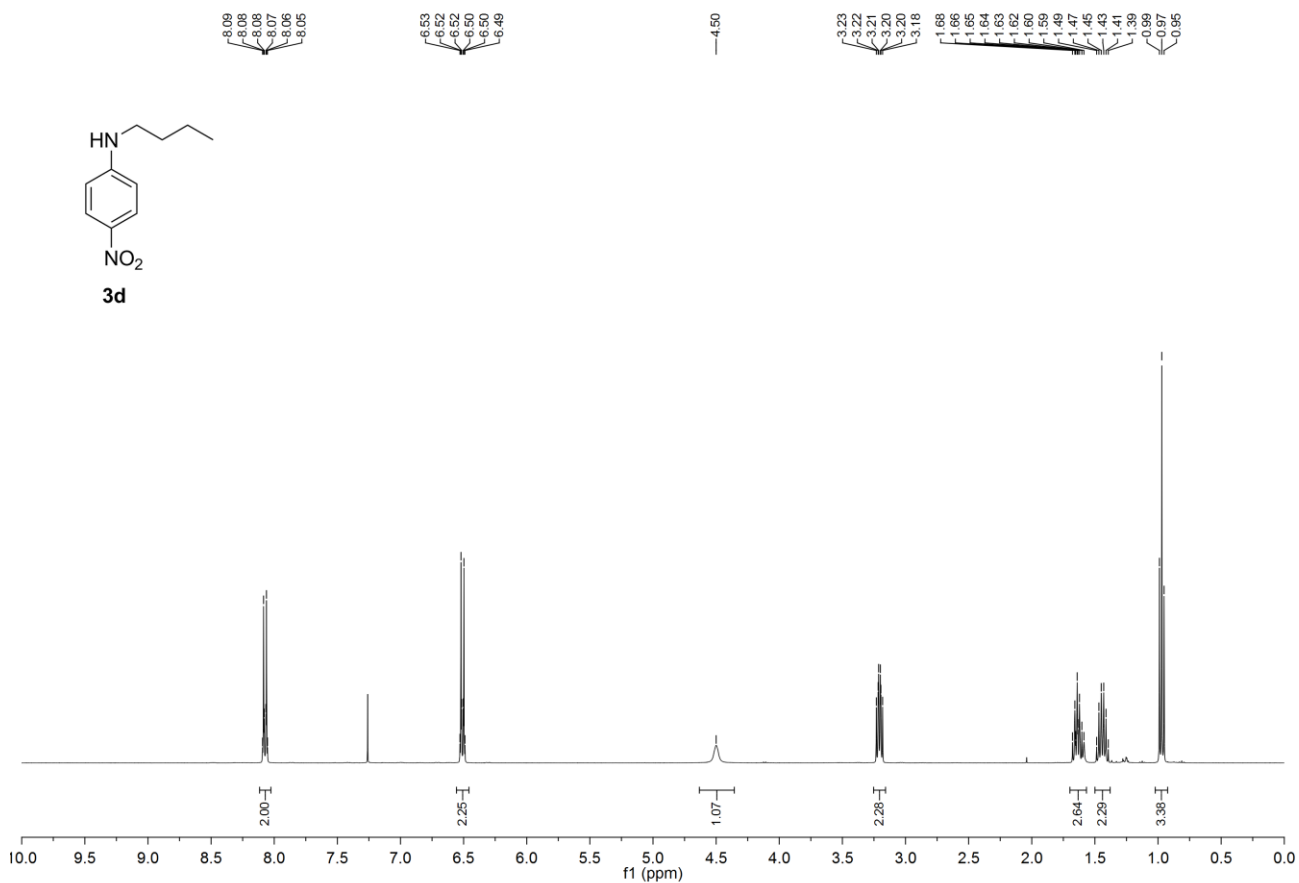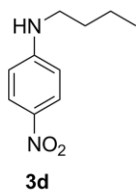

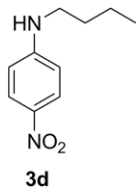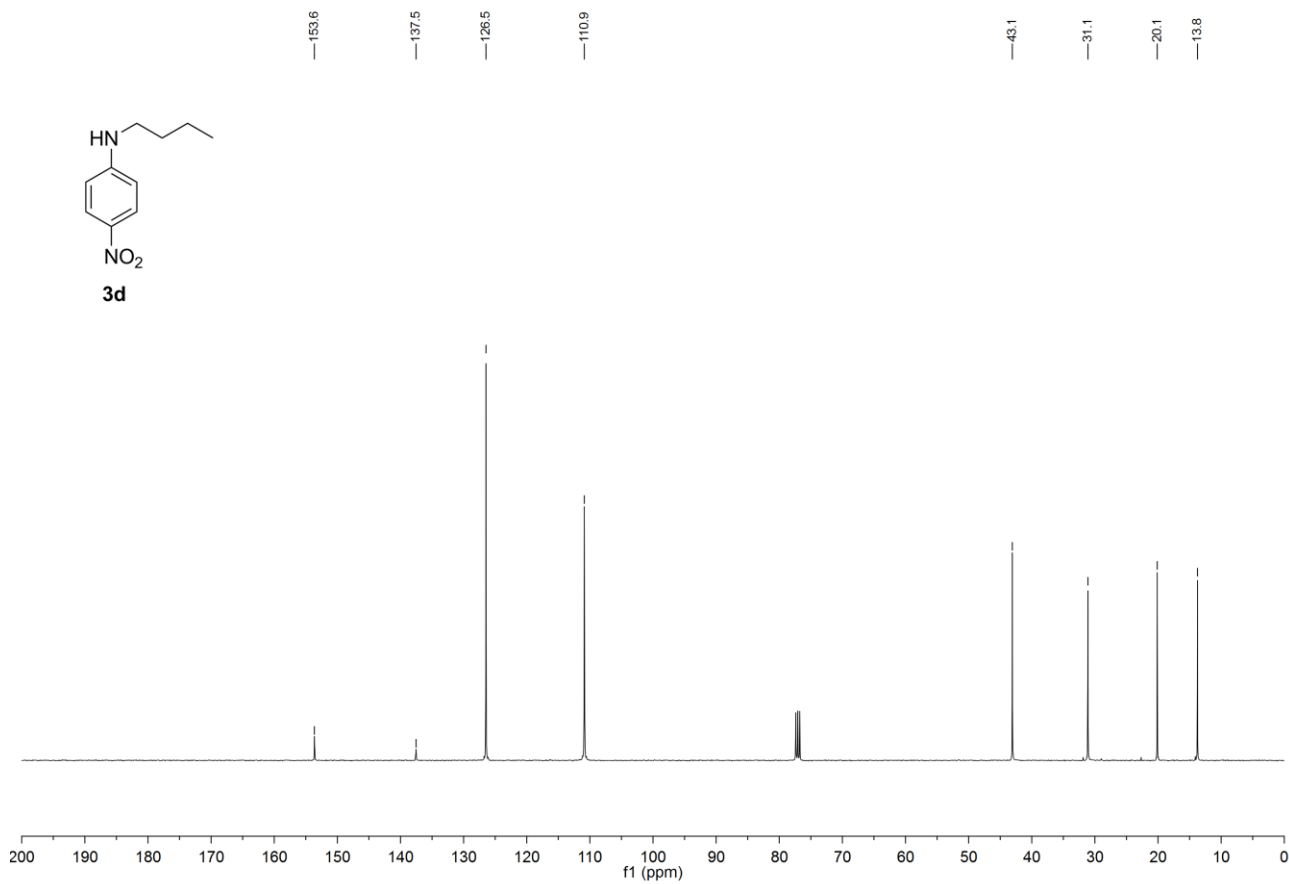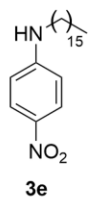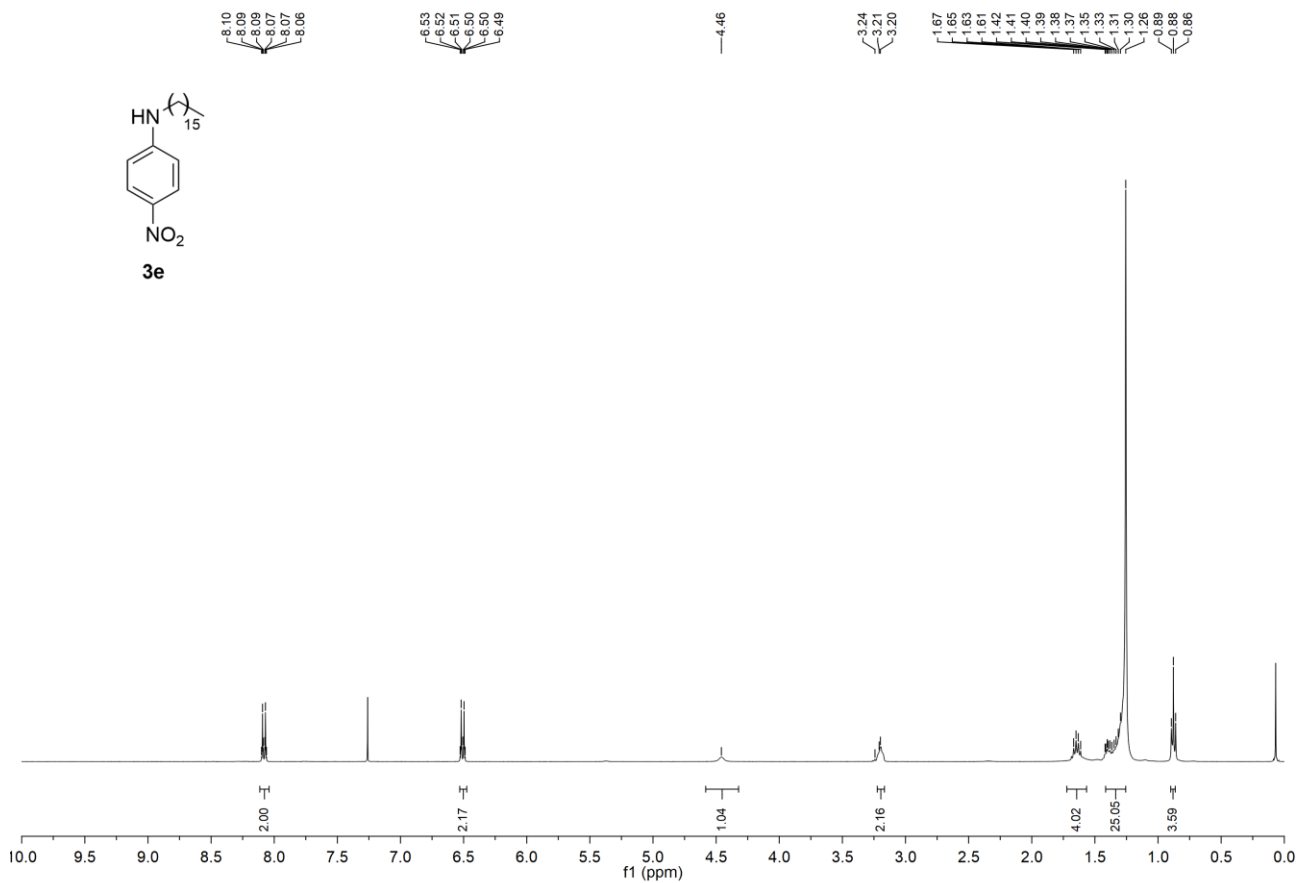

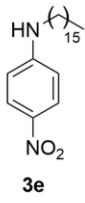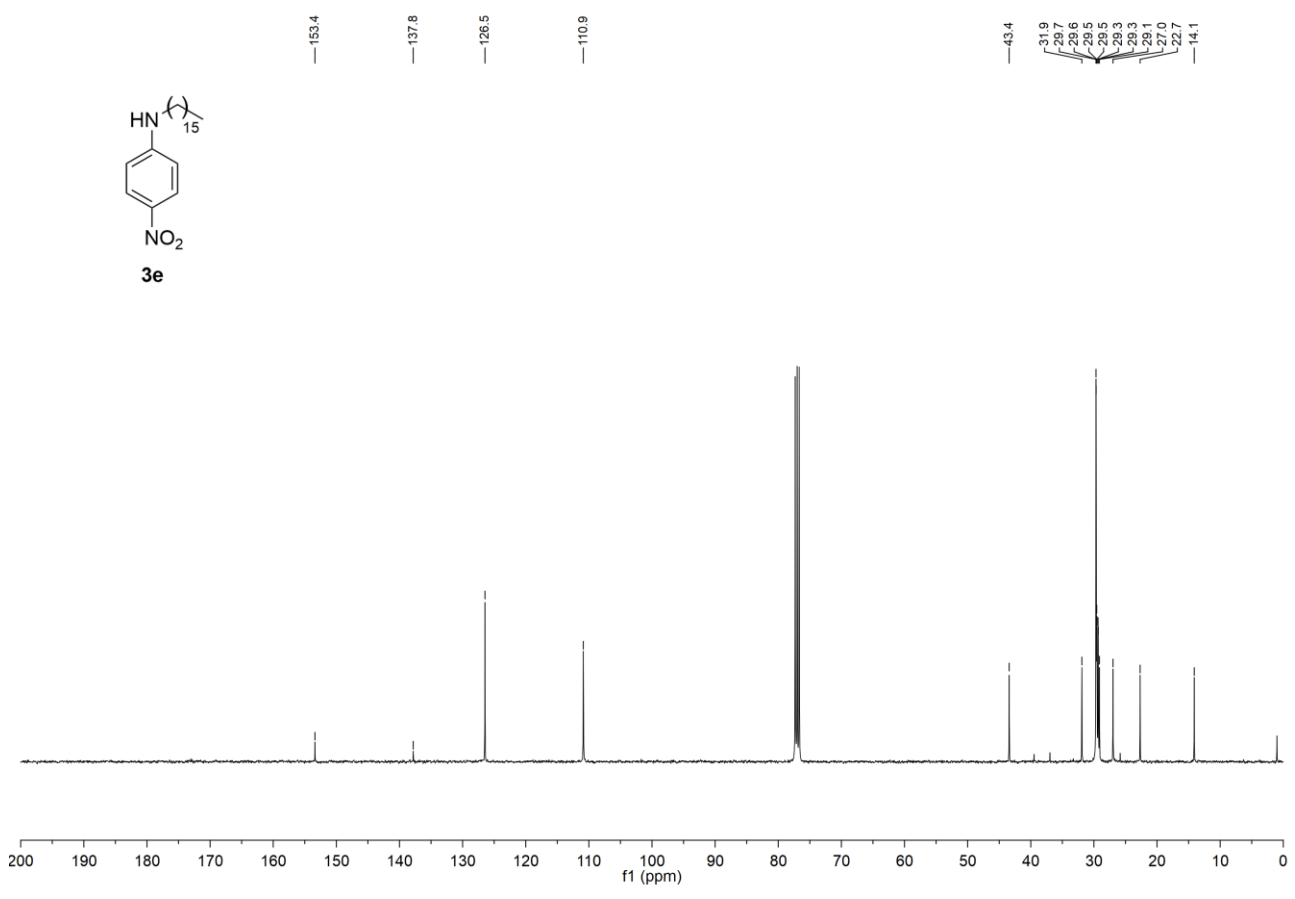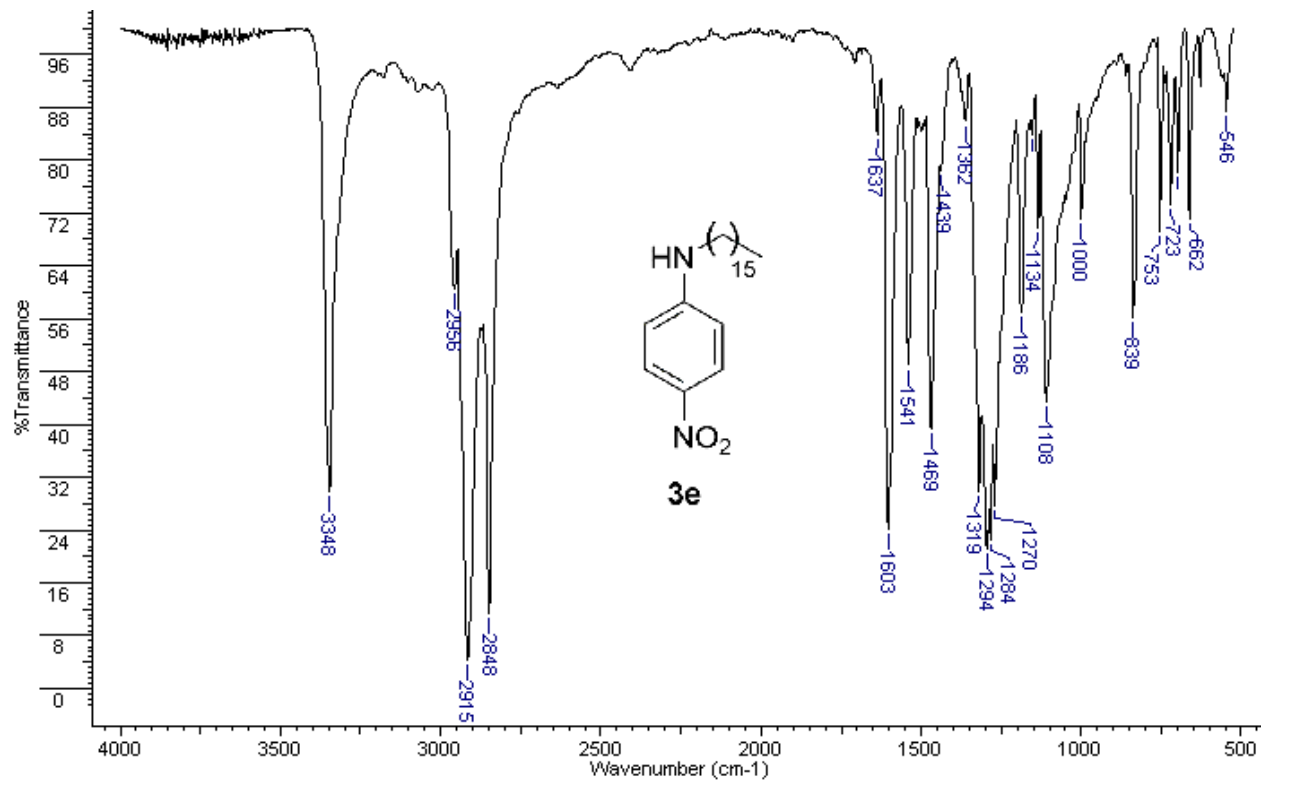

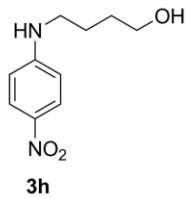

7.98  
 7.97  
 7.28  
 7.27  
 6.63  
 6.63  
 6.62  
 6.61  
 4.46  
 4.45  
 4.44  
 3.46  
 3.44  
 3.43  
 3.41  
 3.15  
 3.14  
 3.12  
 1.64  
 1.62  
 1.62  
 1.61  
 1.60  
 1.60  
 1.59  
 1.58  
 1.56  
 1.55  
 1.54  
 1.53  
 1.51  
 1.51  
 1.50  
 1.49  
 1.48  
 1.47  
 1.47

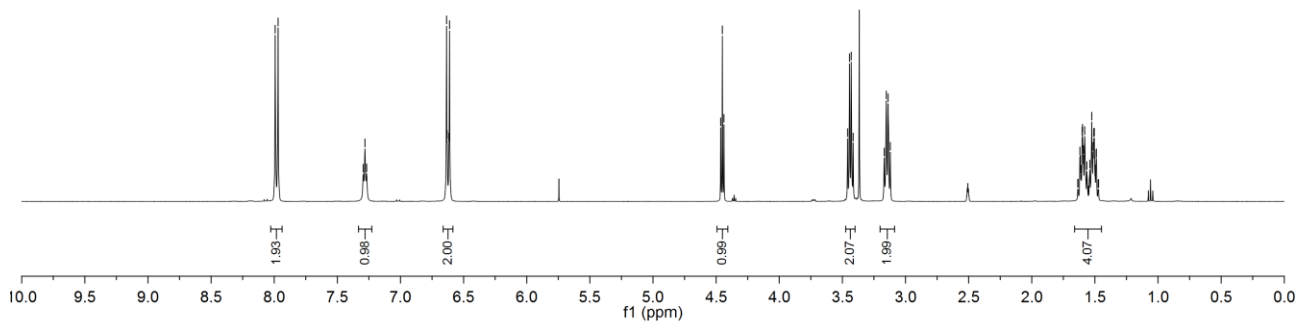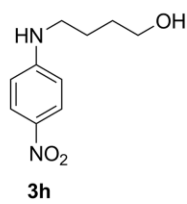

155.1  
 135.9  
 126.7  
 111.1  
 60.9  
 42.7  
 30.4  
 25.5

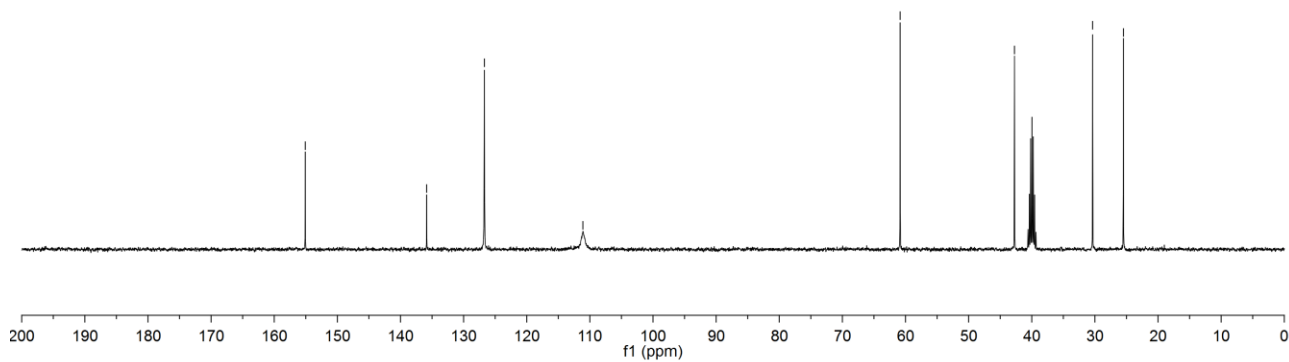

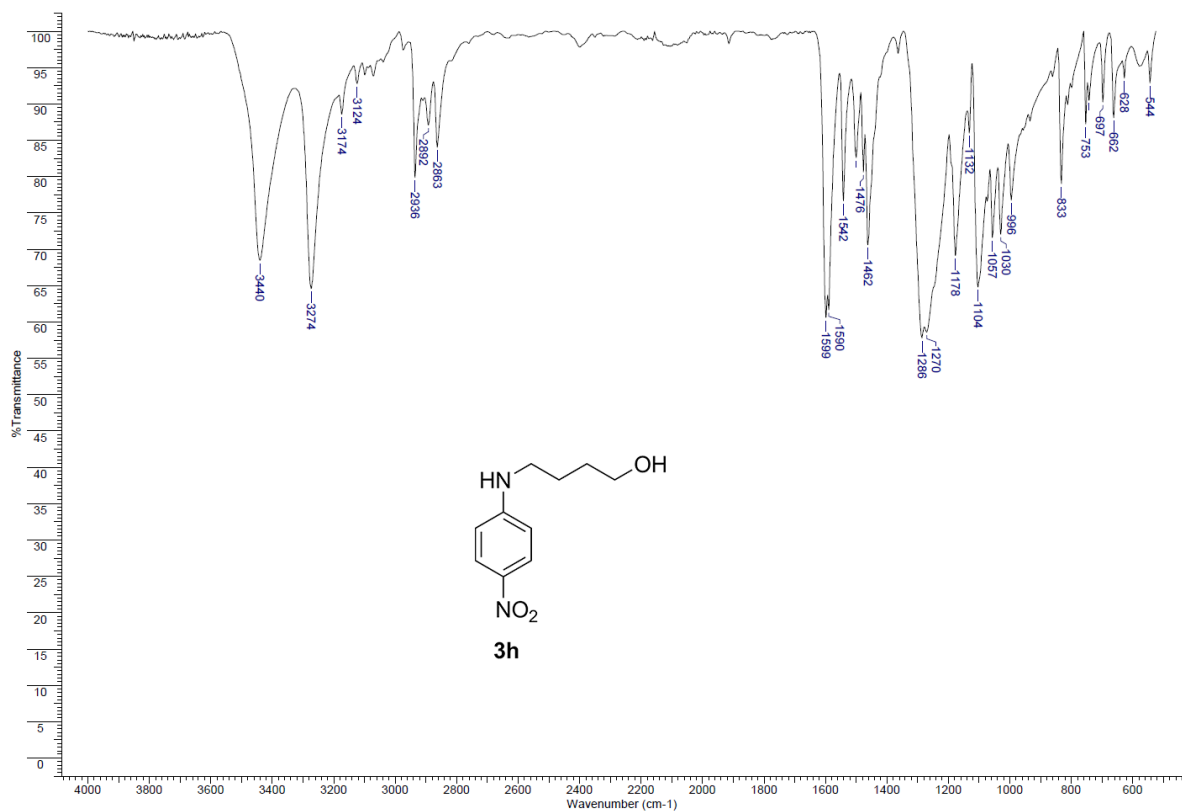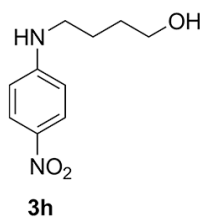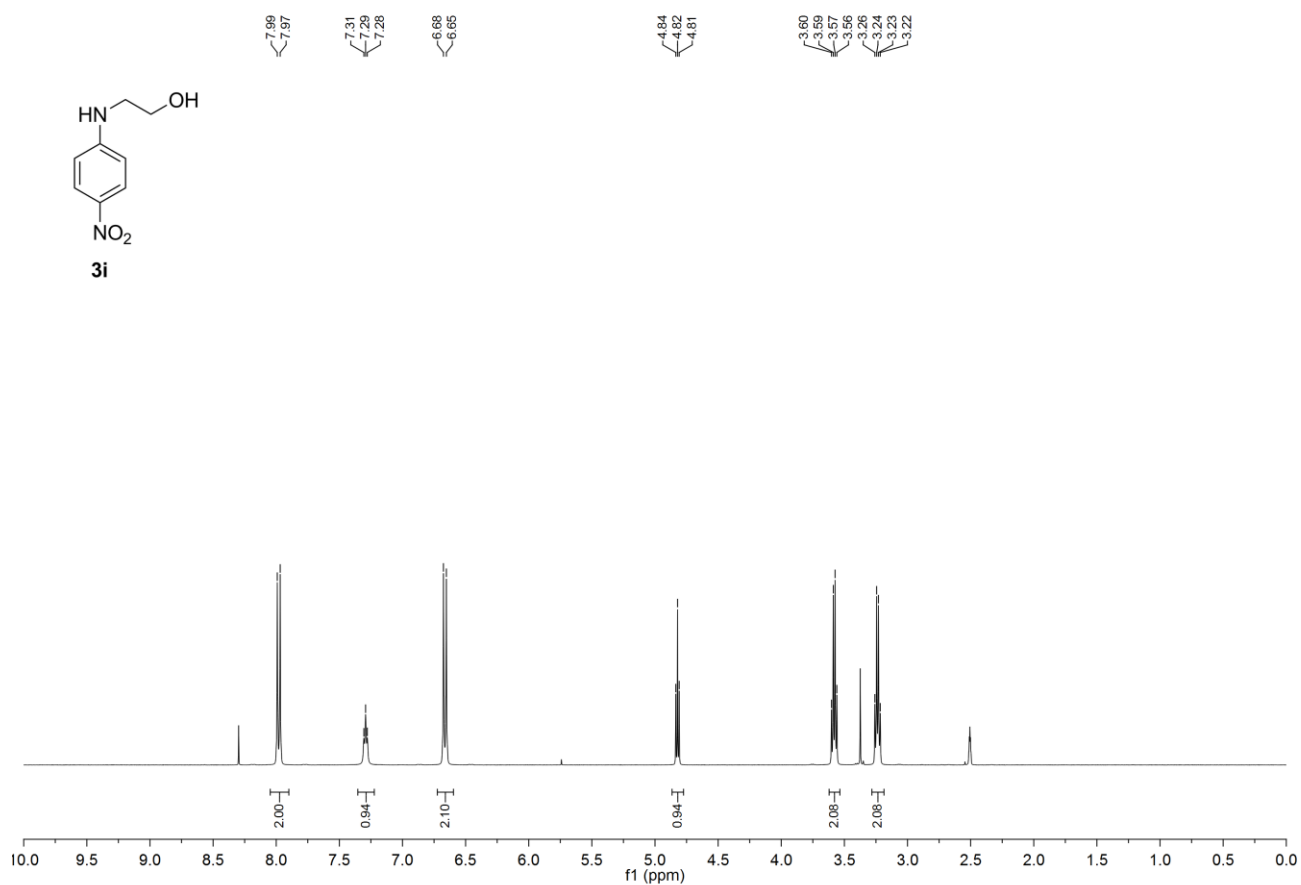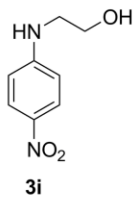

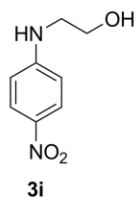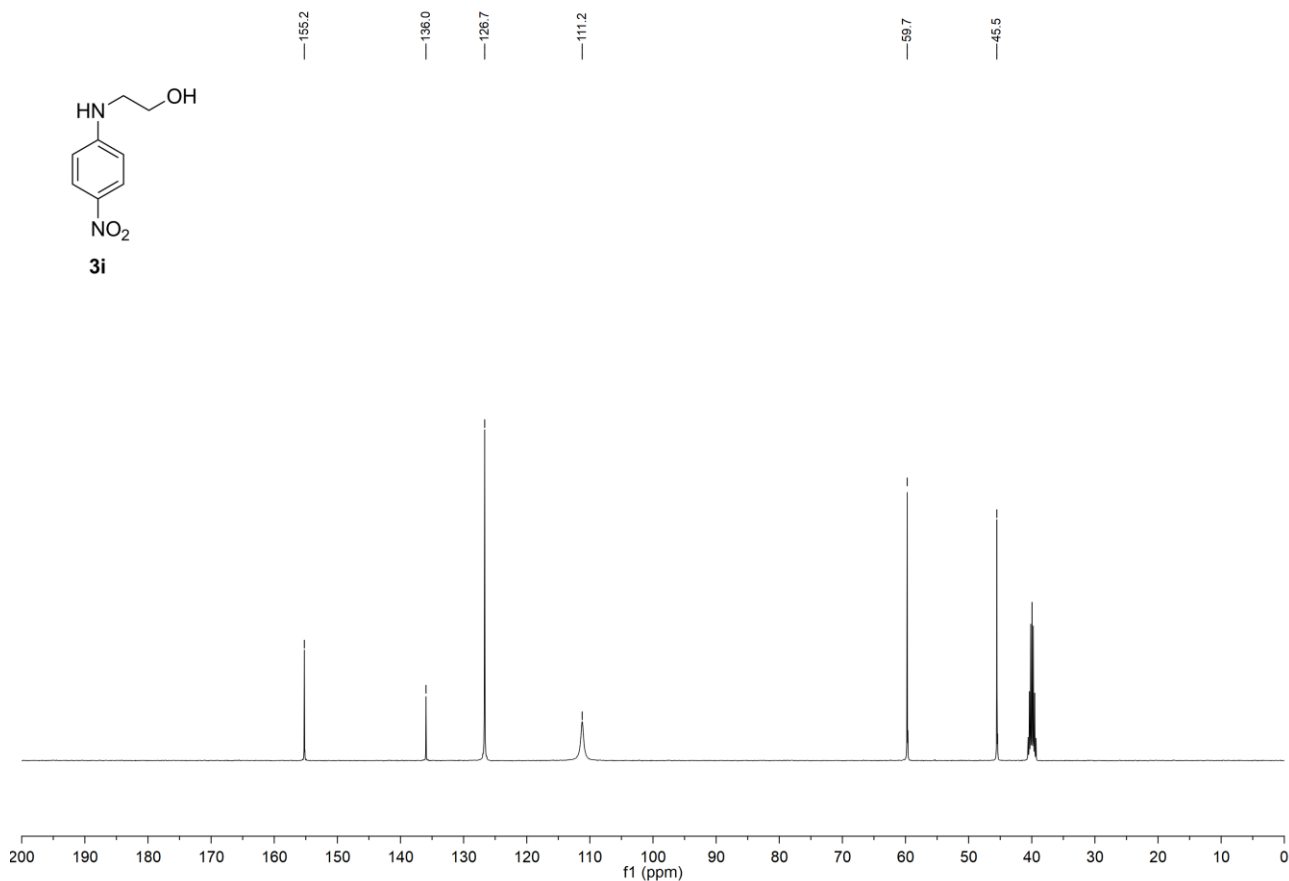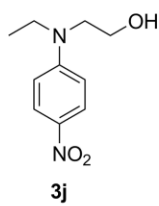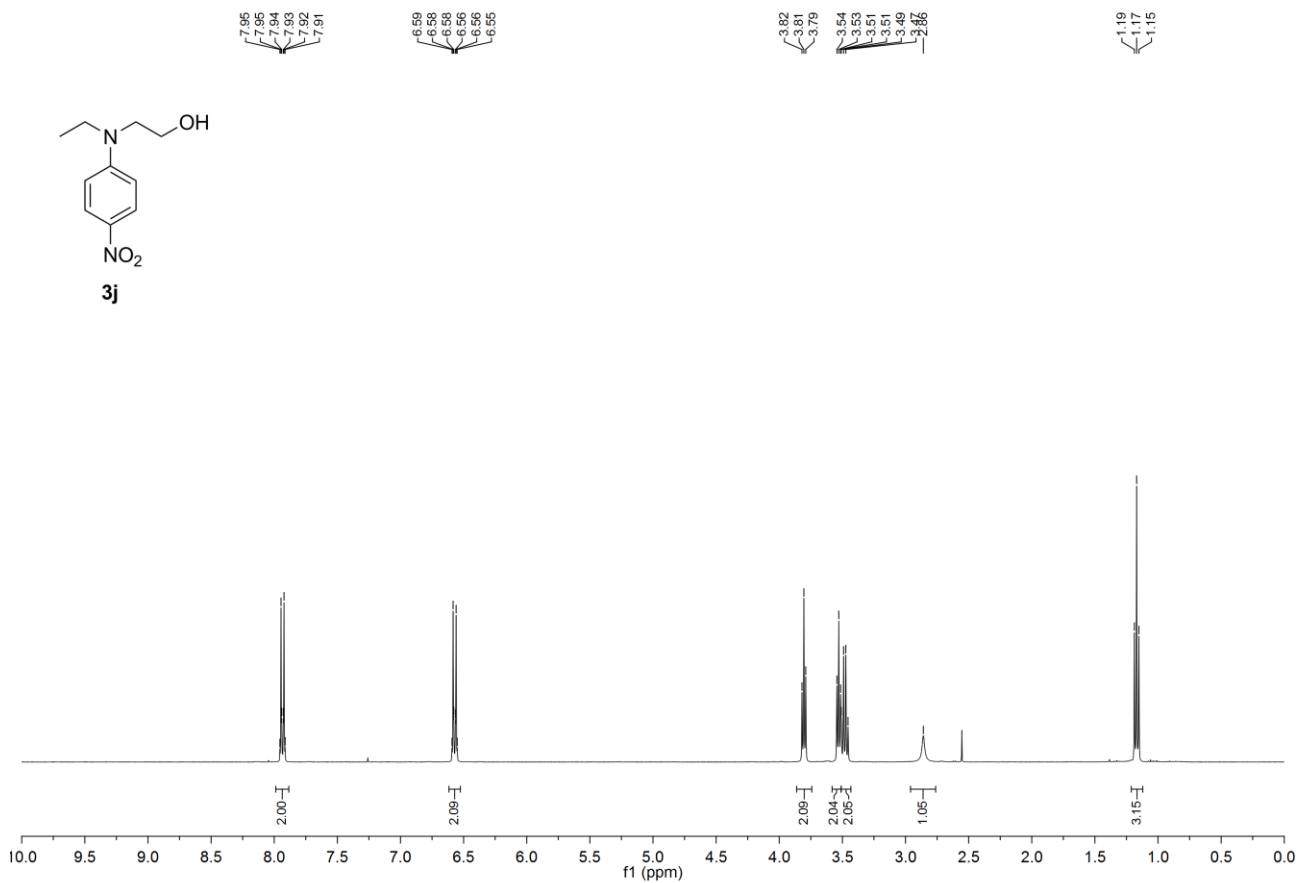

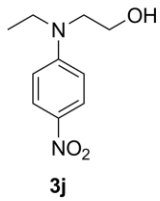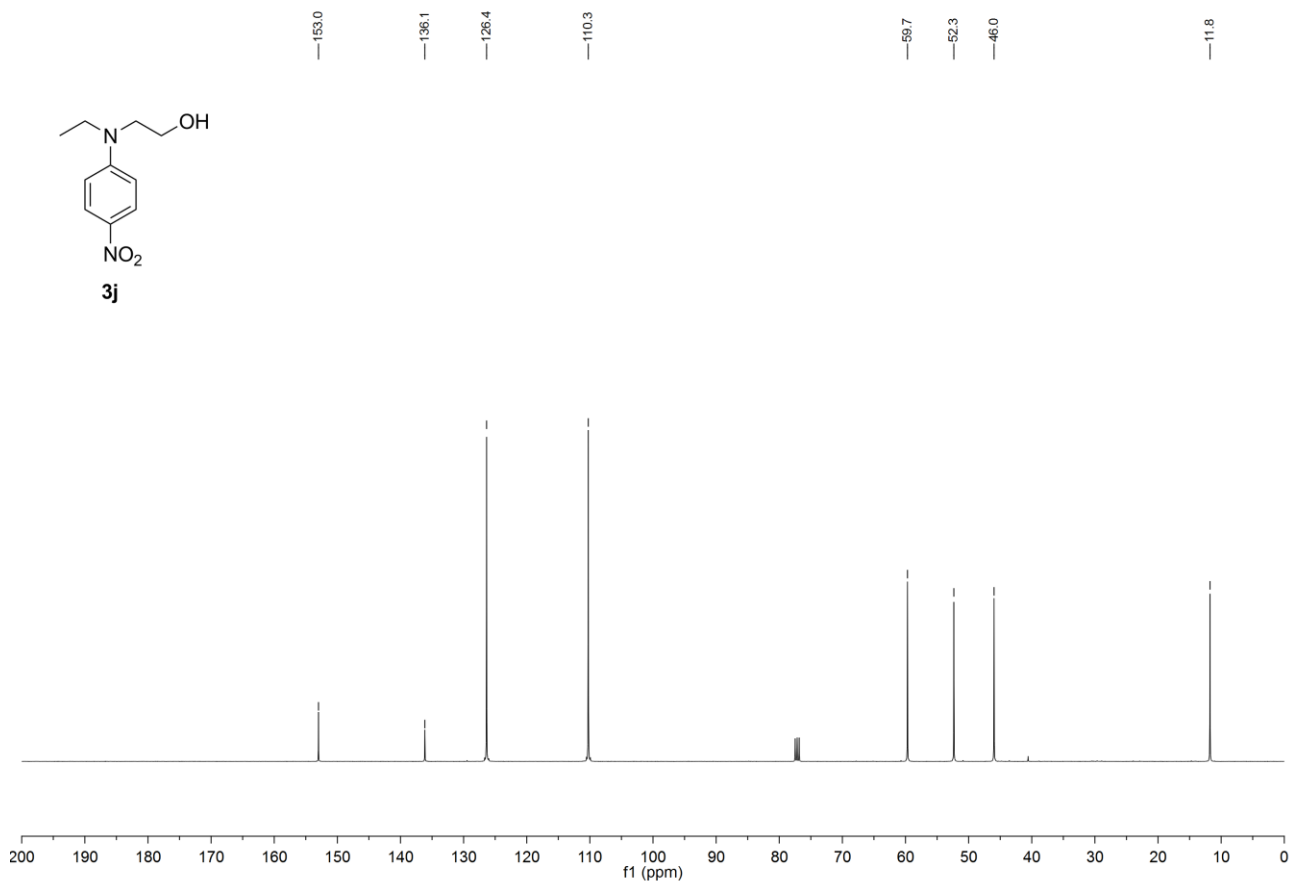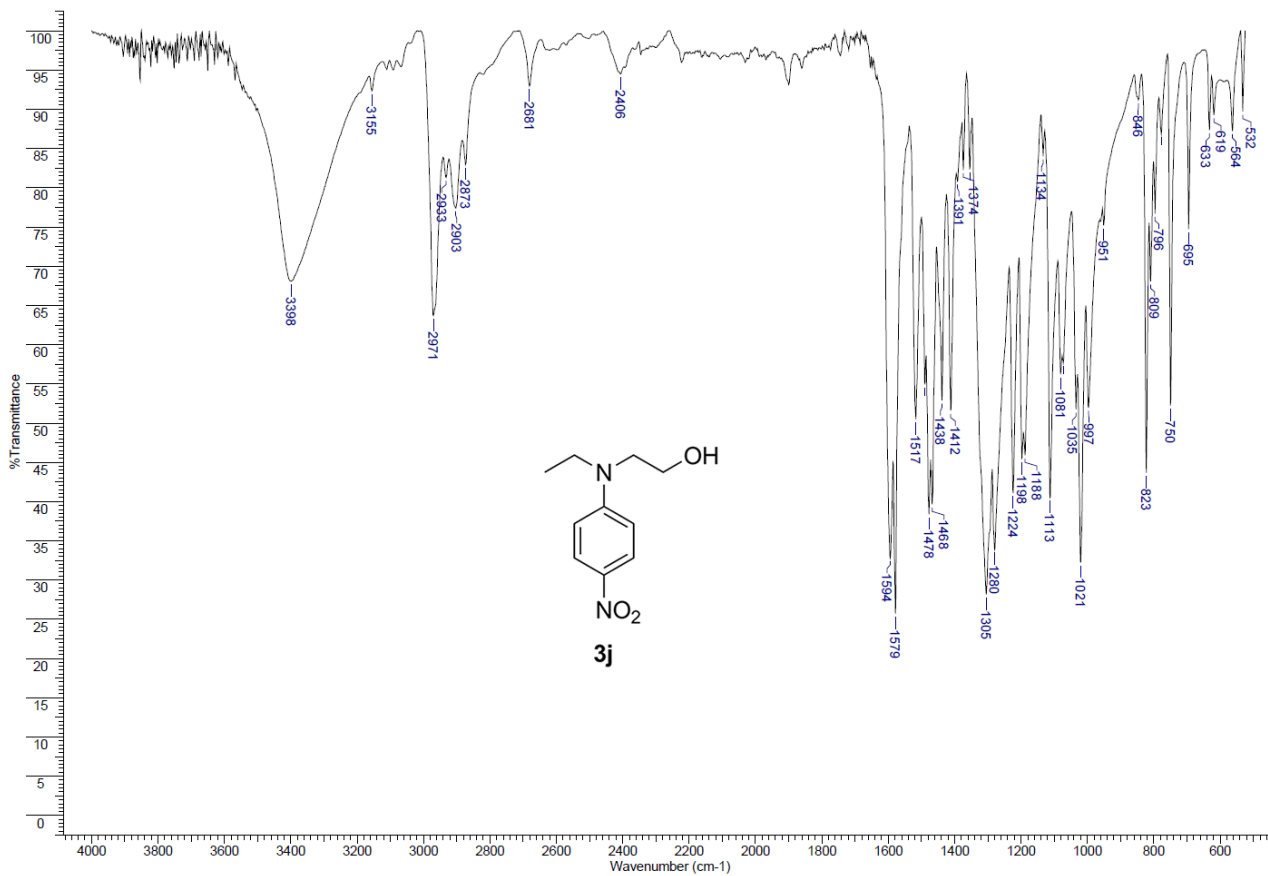

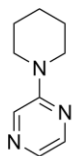

5a

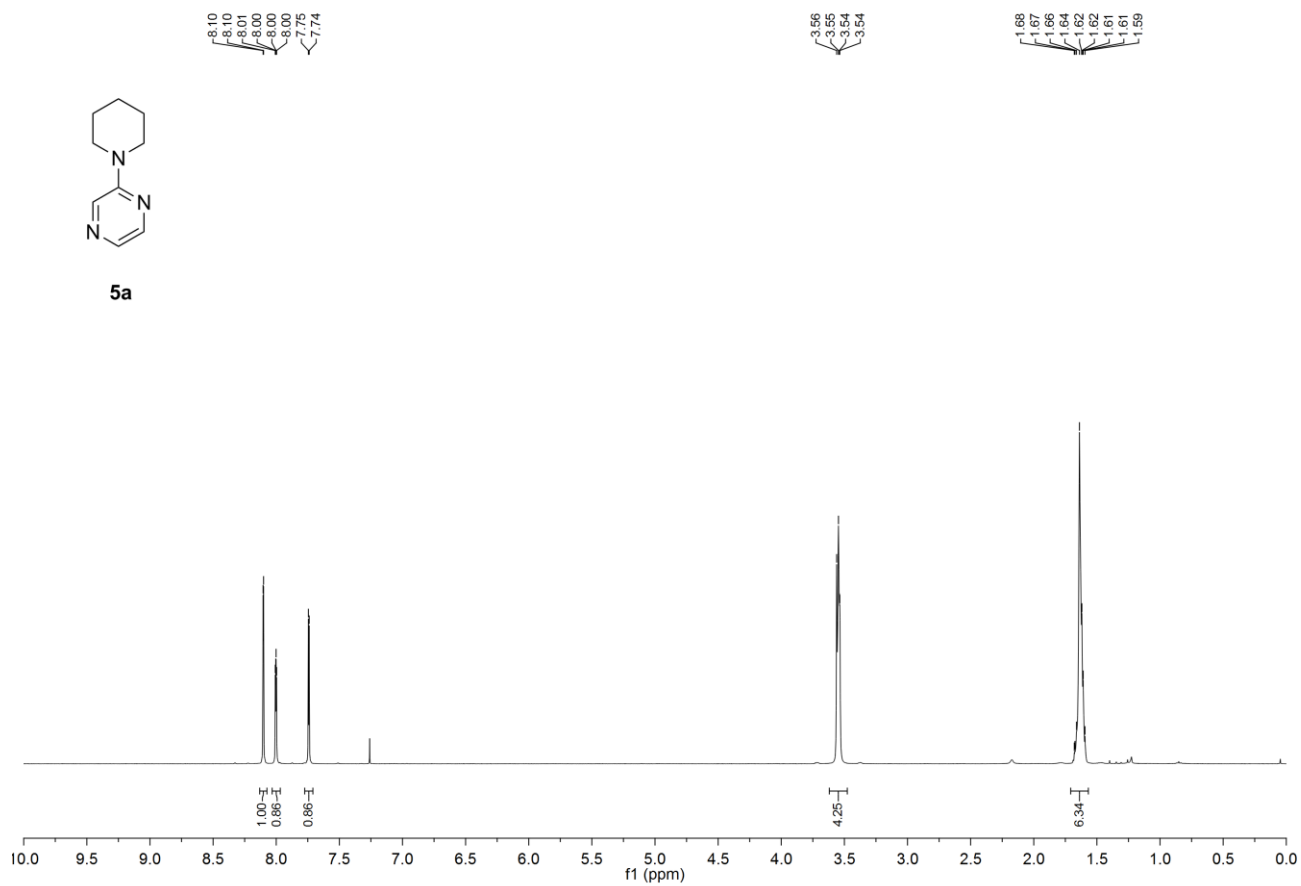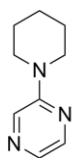

5a

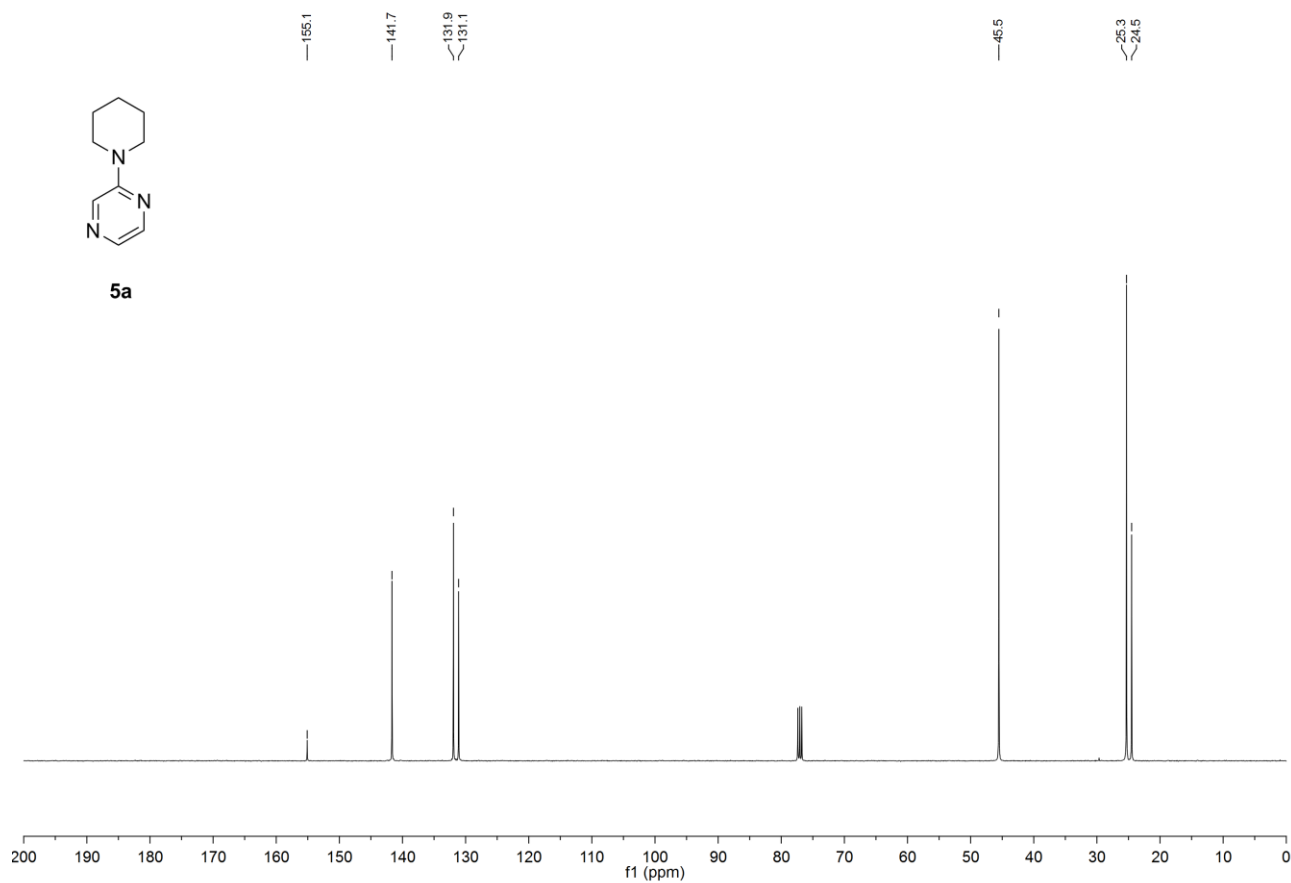



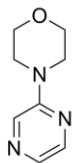

5b

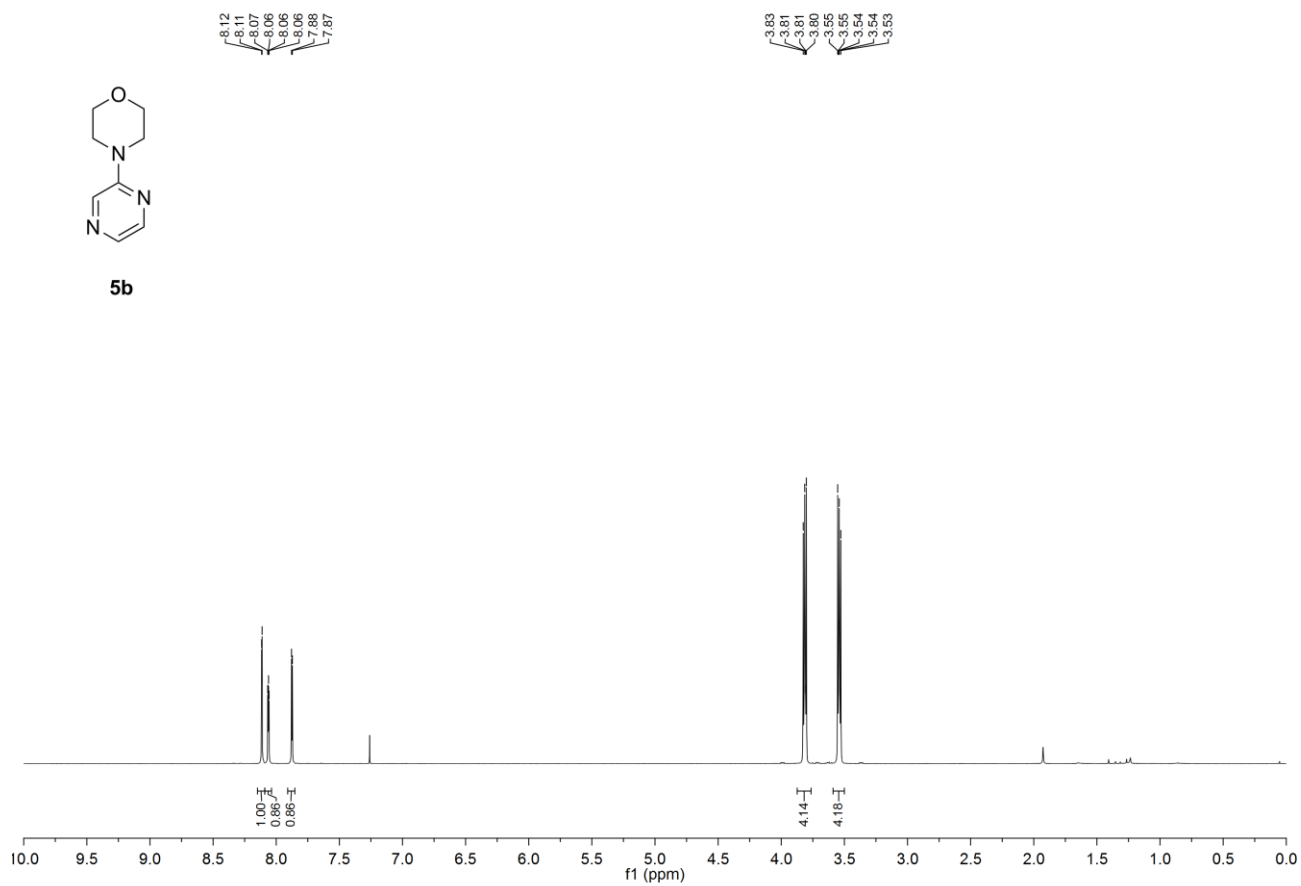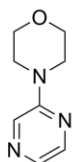

5b

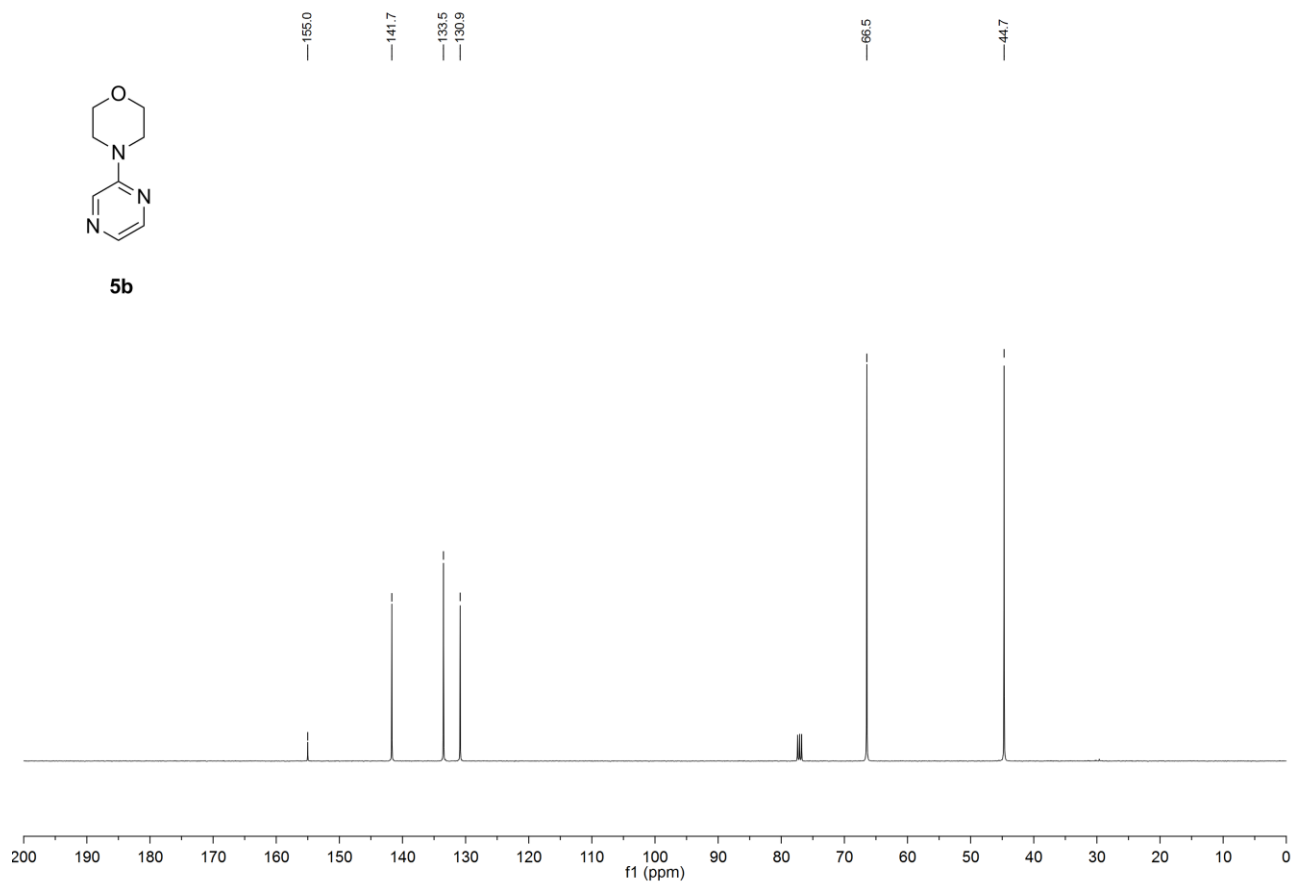

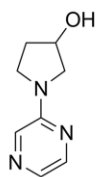

5c

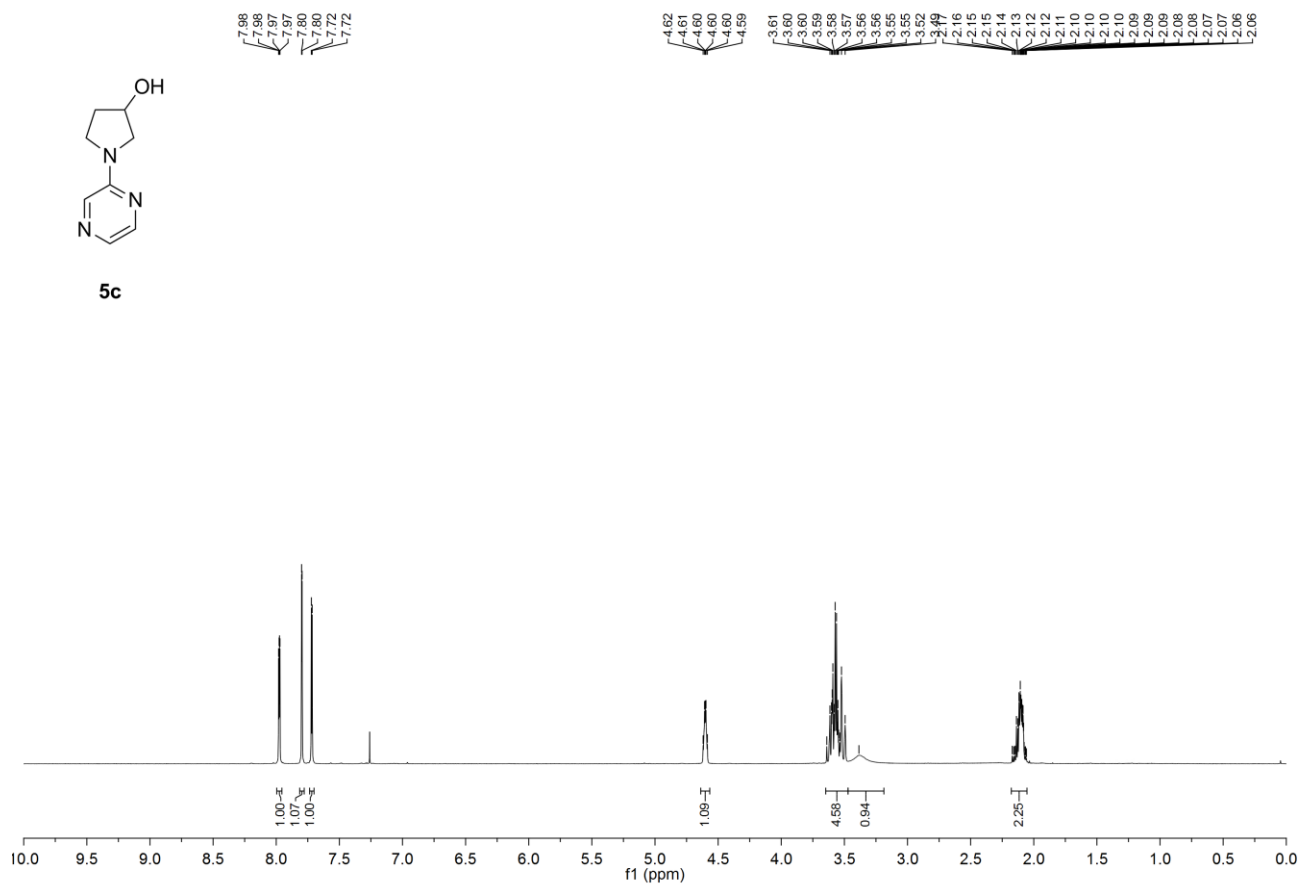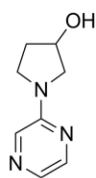

5c

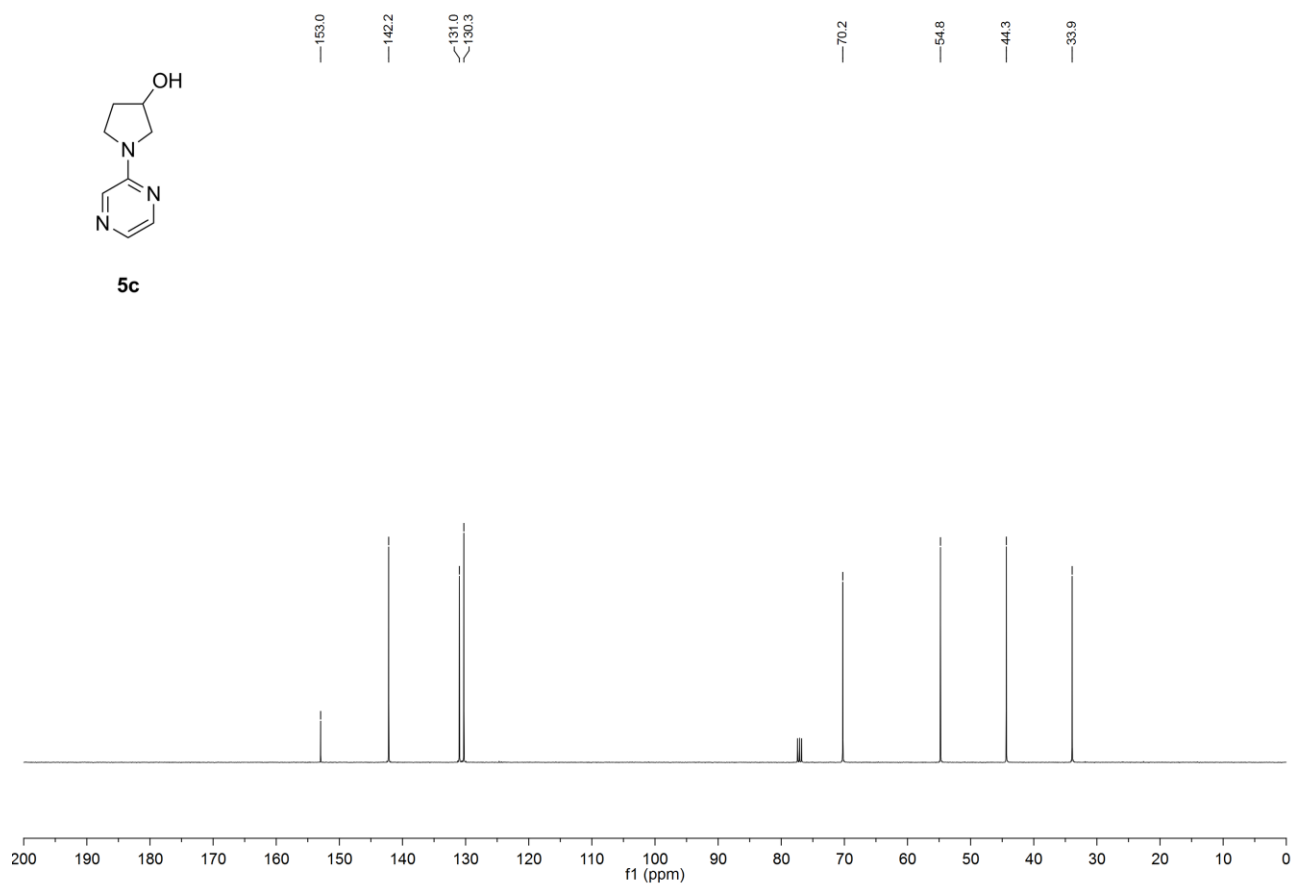

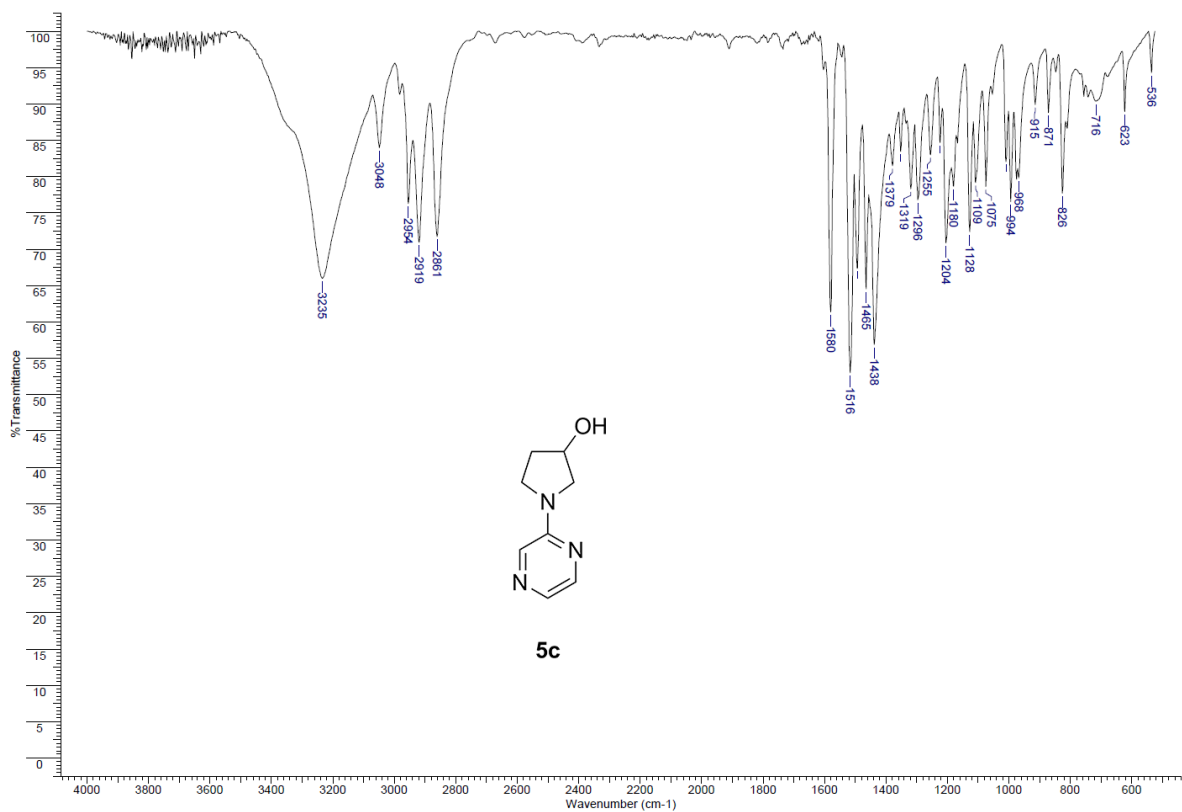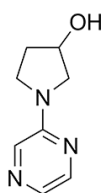

**5c**

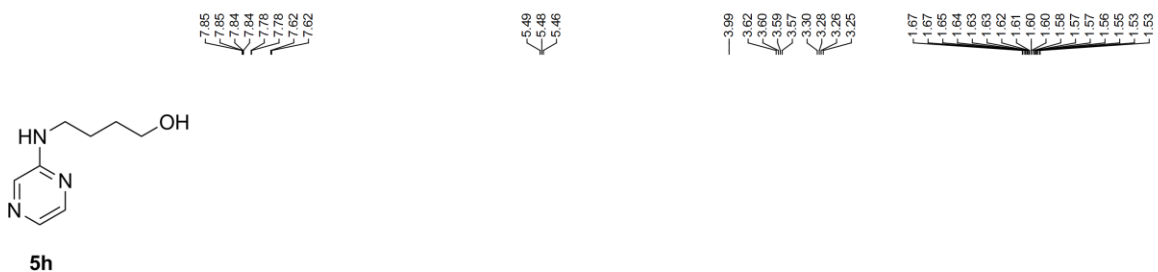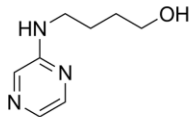

**5h**

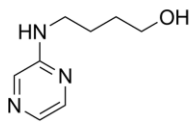

**5h**

154.8  
141.8  
132.2  
132.0  
0.29  
11.1  
28.8  
25.9

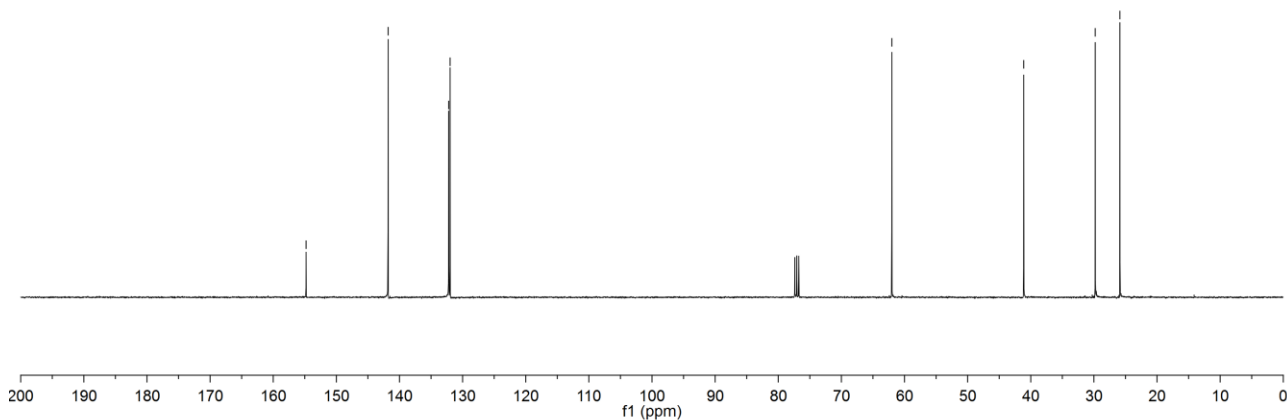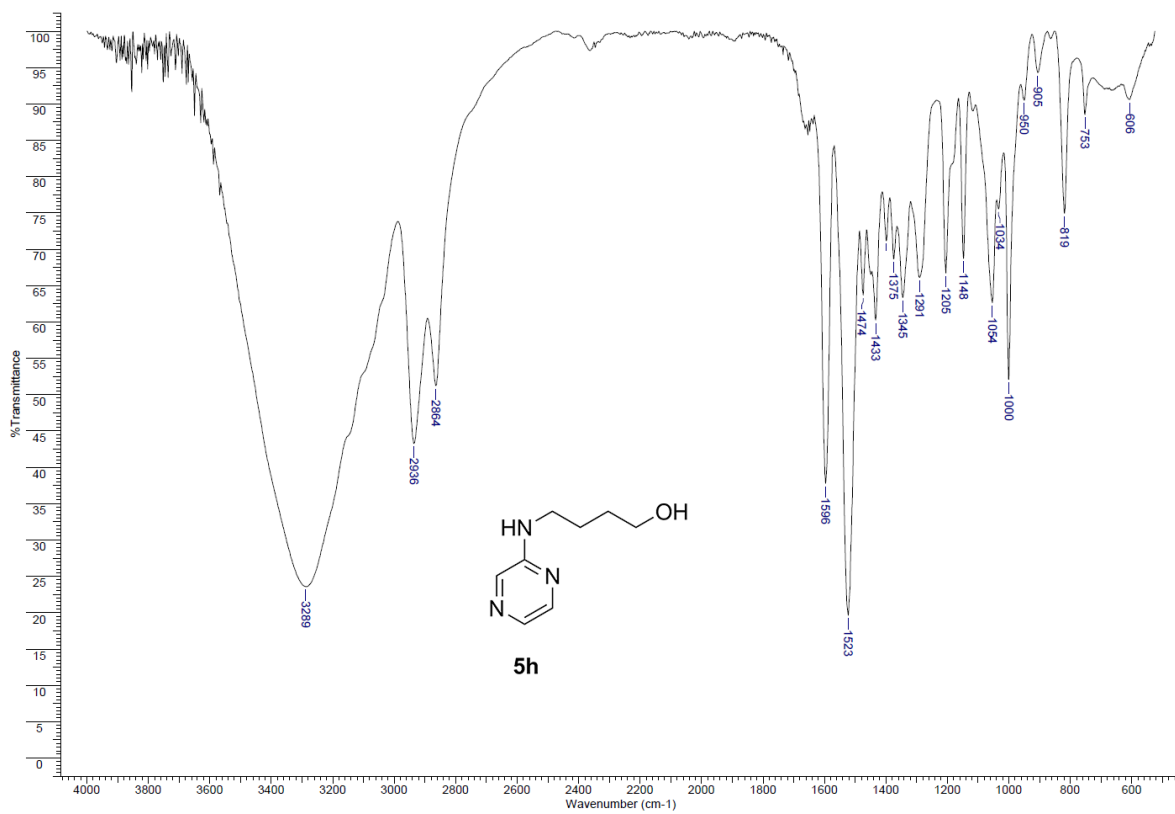

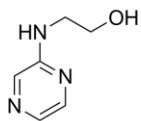

5i

7.87  
7.87  
7.86  
7.86  
7.85  
7.84  
7.84  
7.68  
7.68

—5.59

—4.49

3.78  
3.76  
3.75  
3.49  
3.47  
3.46  
3.45

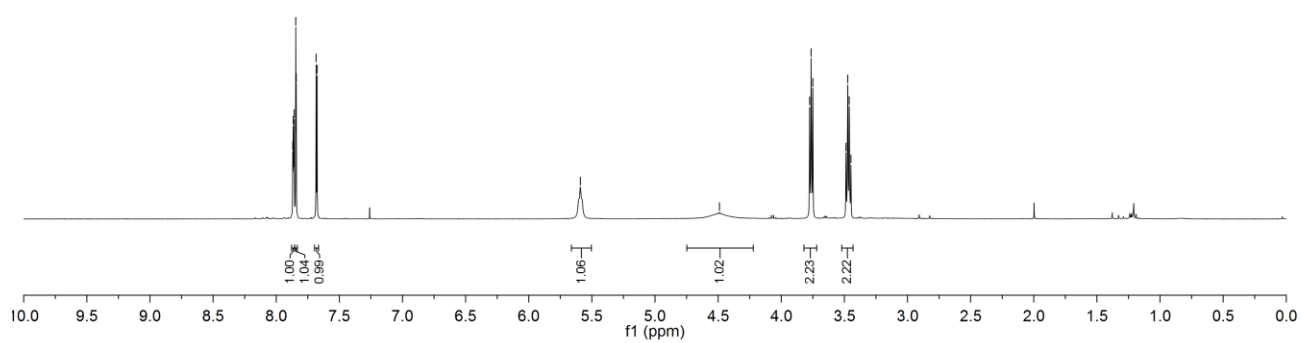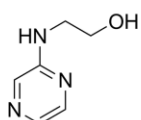

5i

—154.9

—141.4

132.9  
132.3

—61.8

—44.0

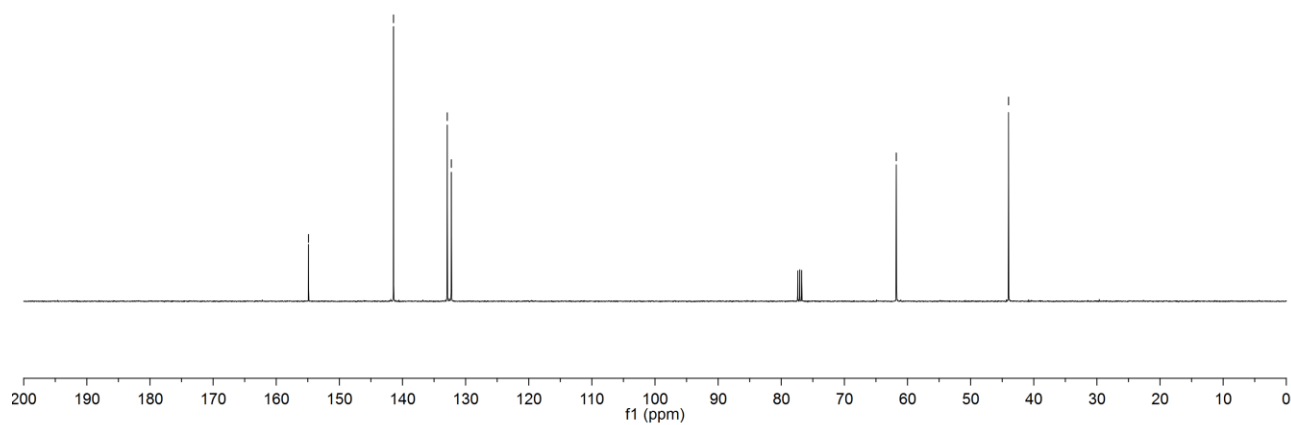

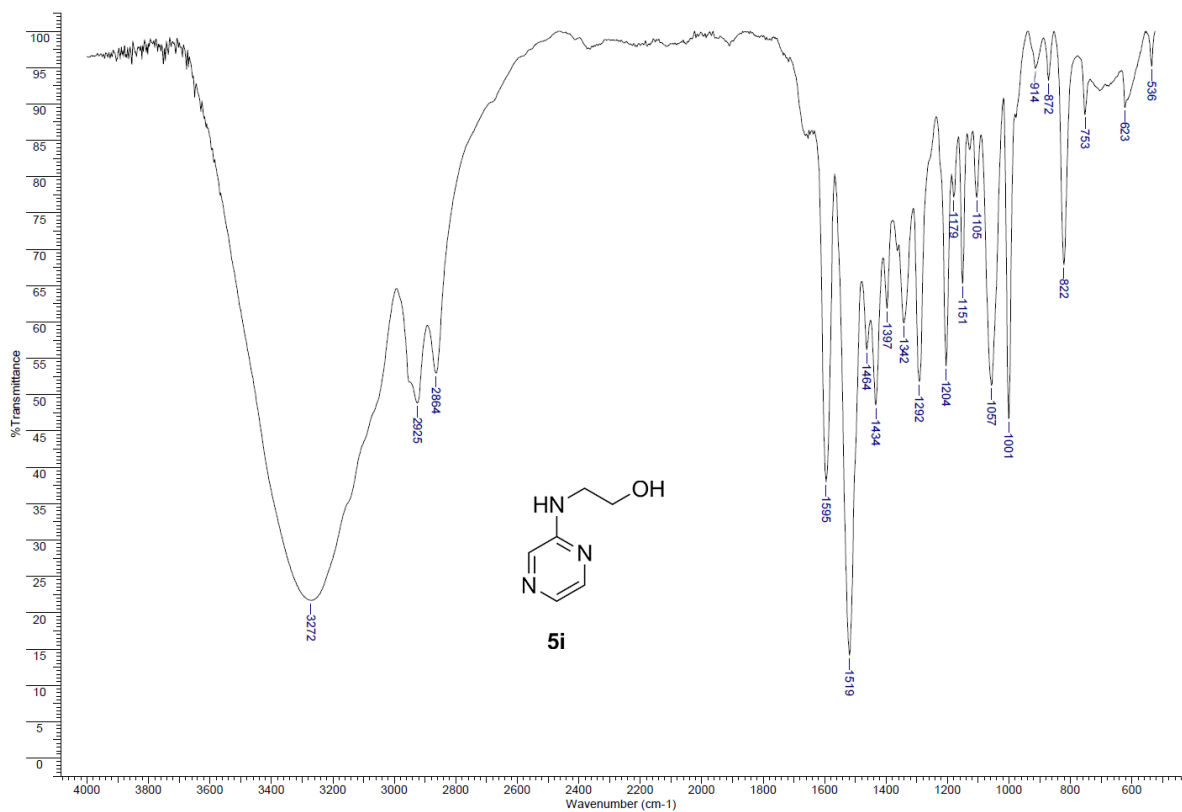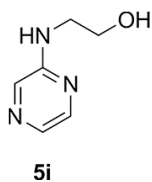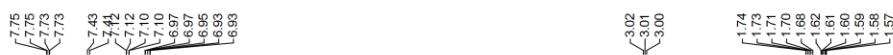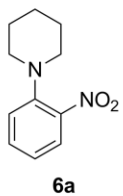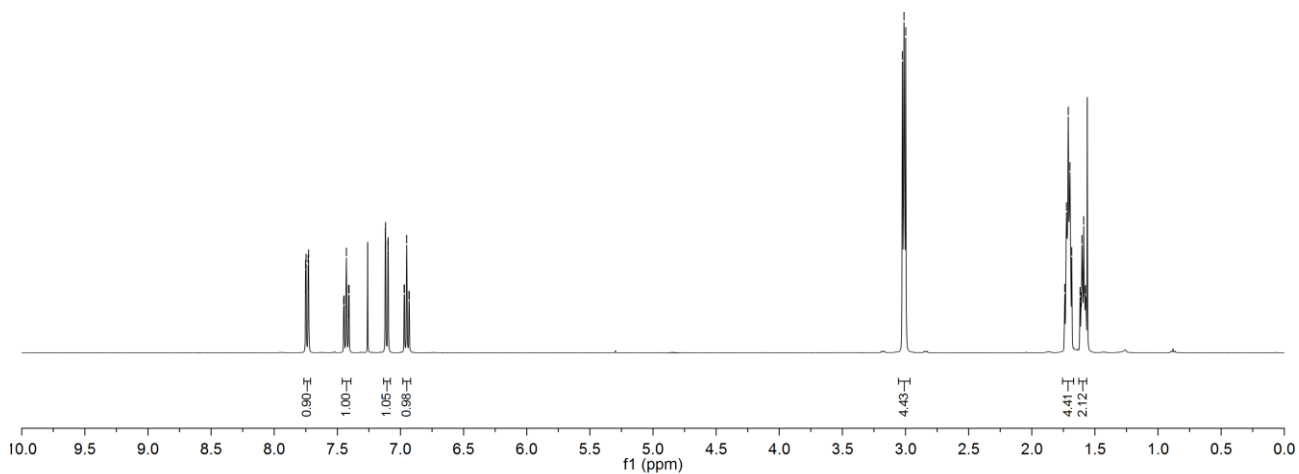

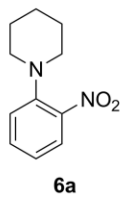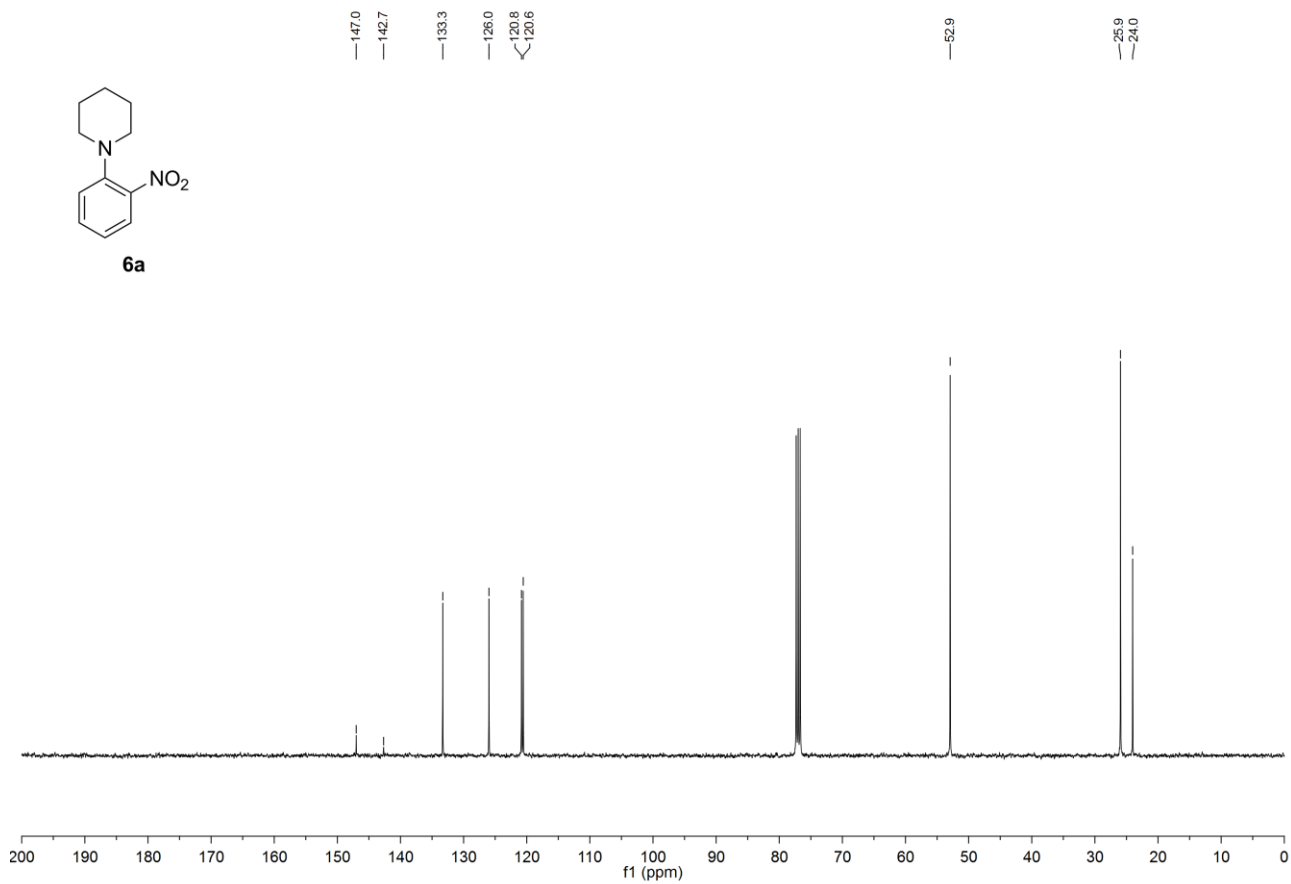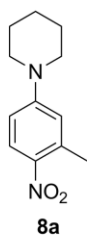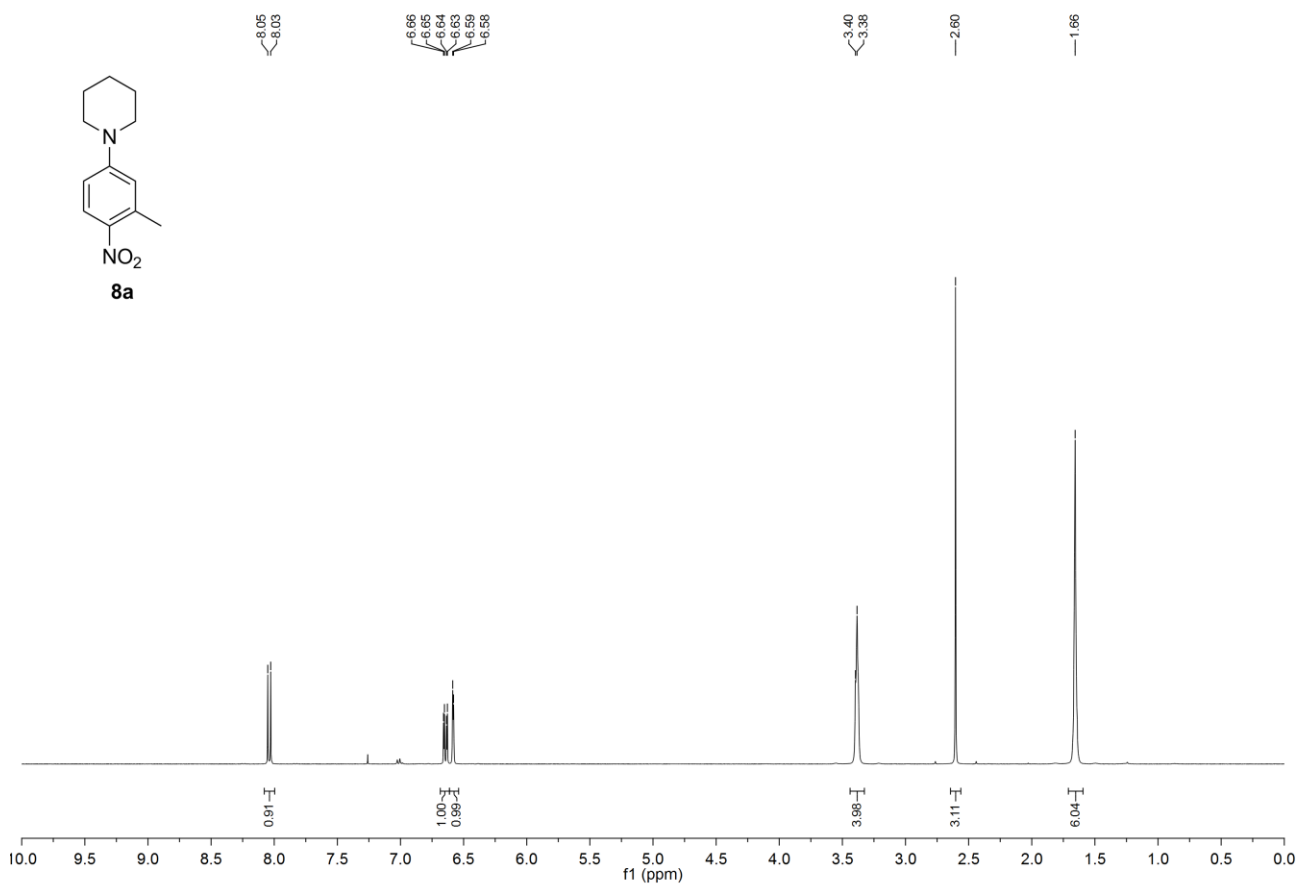

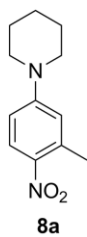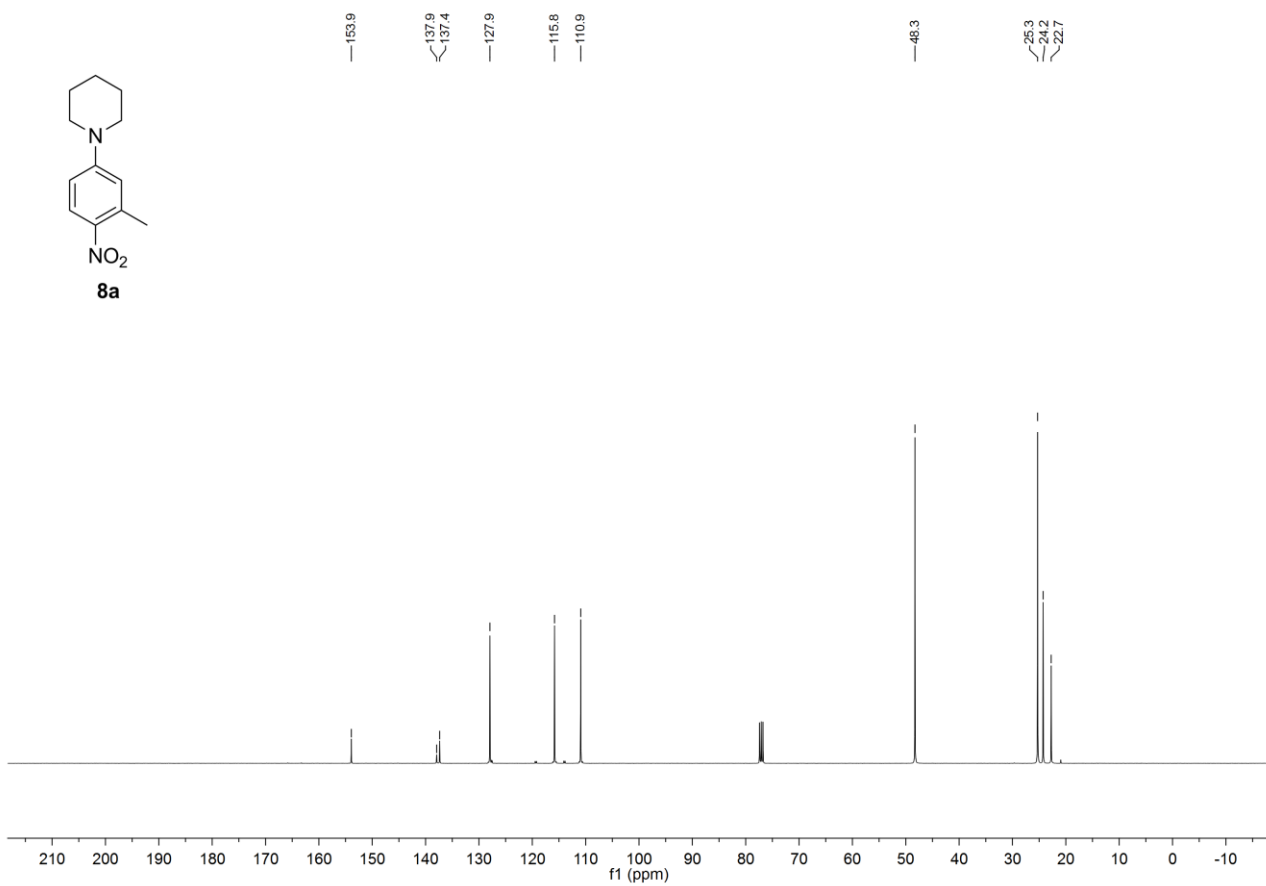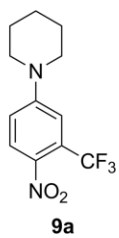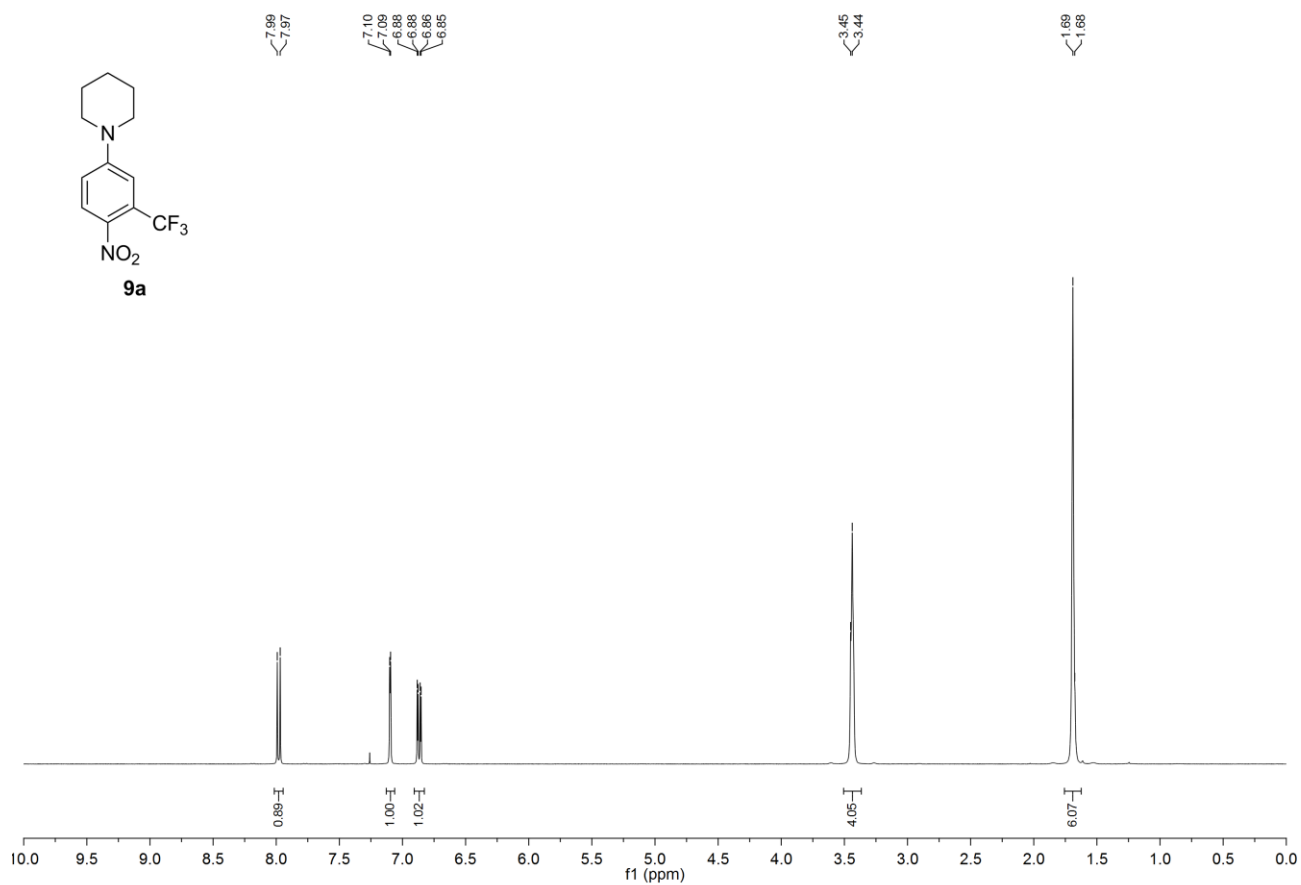



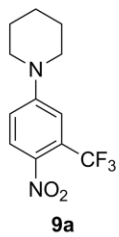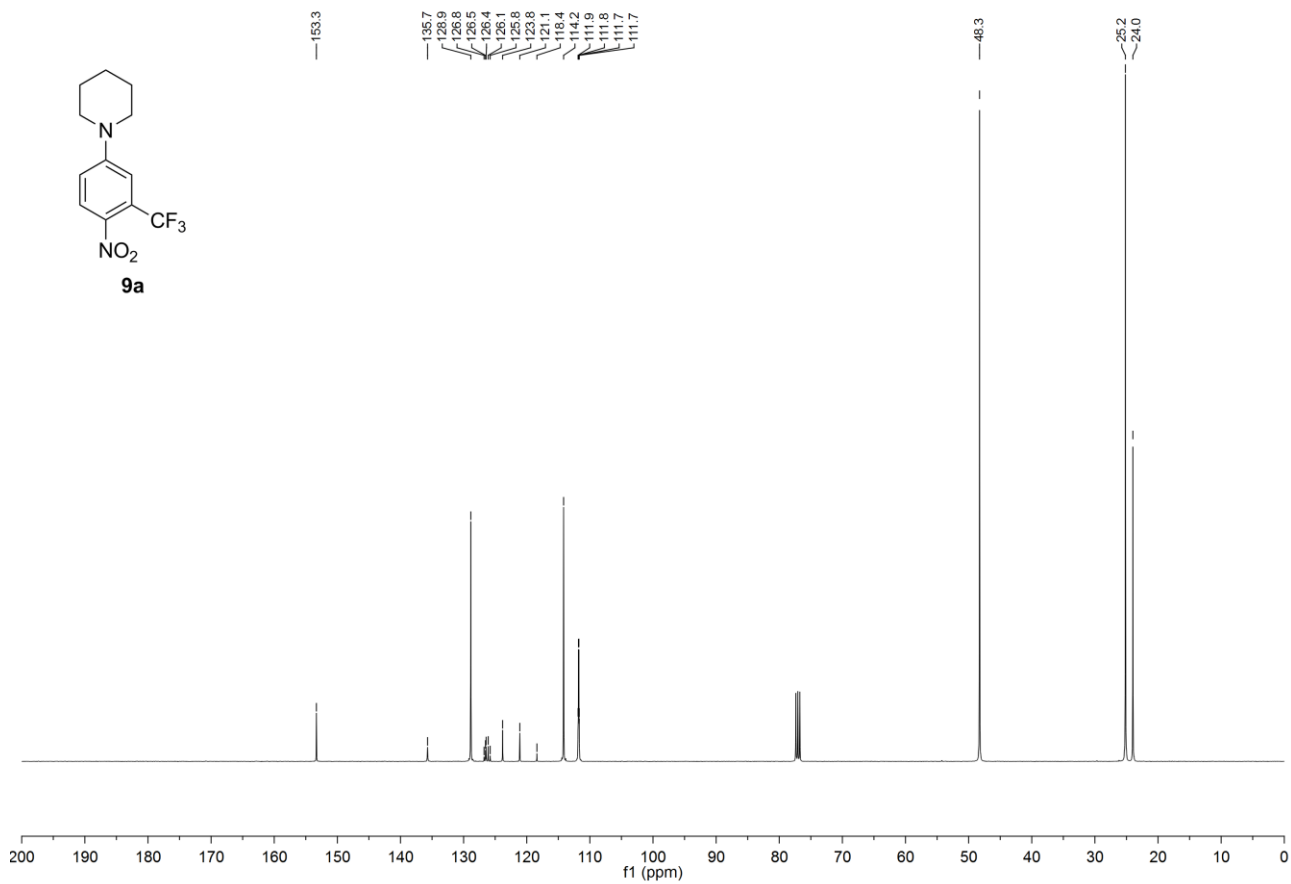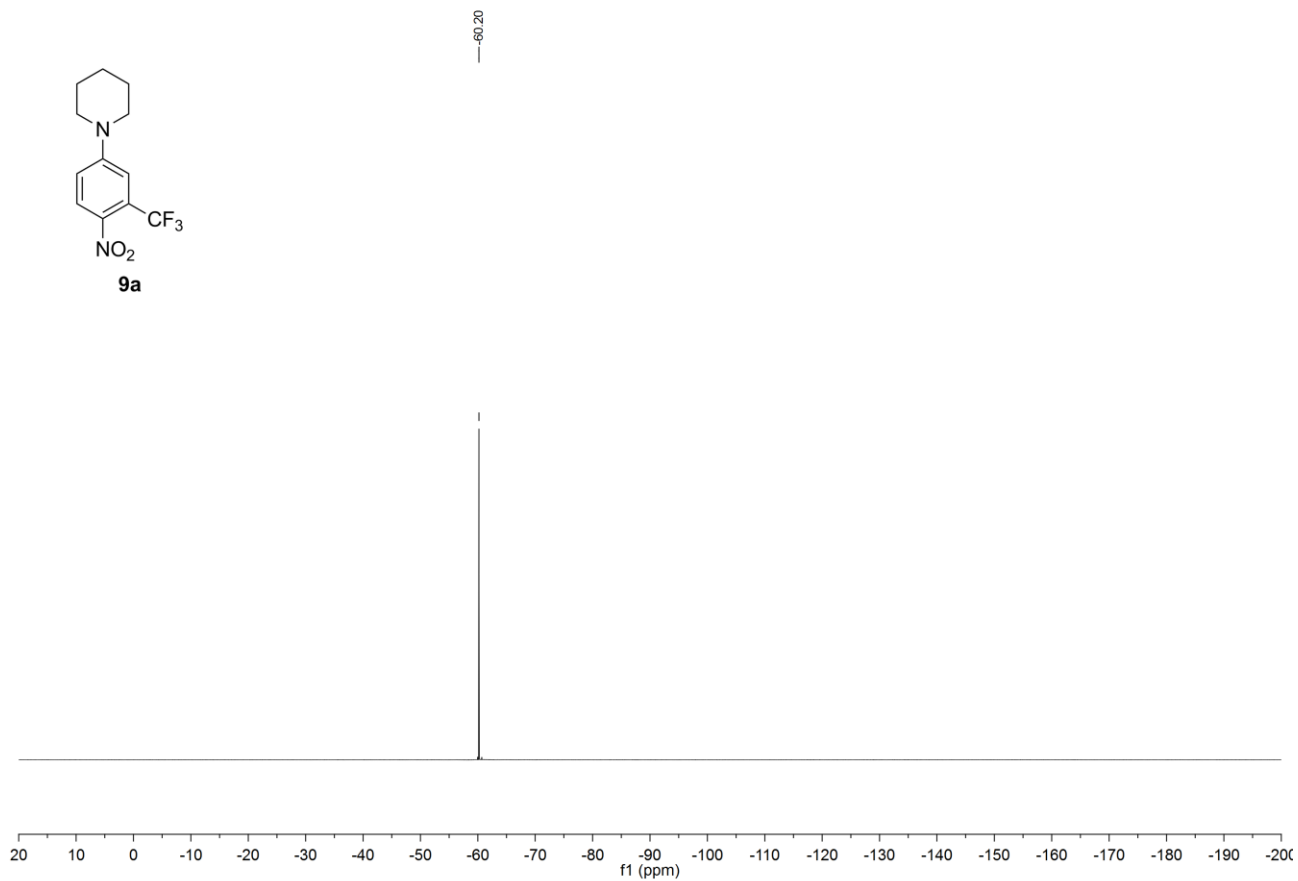

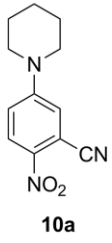

8.16  
8.13

7.09  
7.08  
6.94  
6.94  
6.92  
6.91

3.49  
3.48

1.74  
1.72  
1.70  
1.69  
1.67

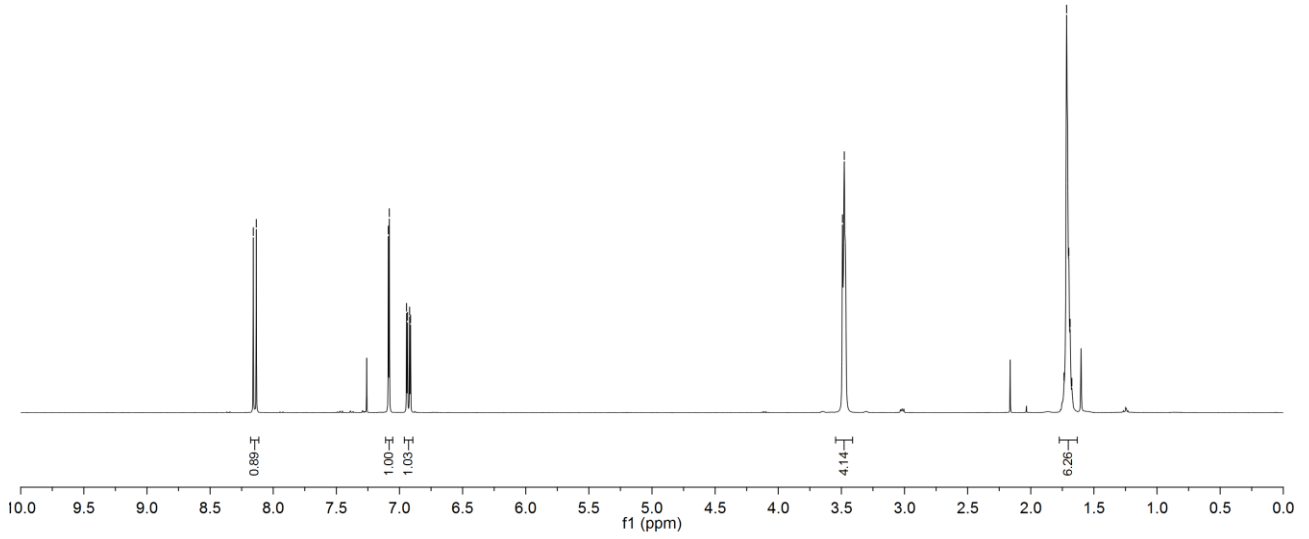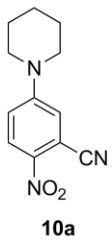

153.3

136.1

128.0

118.5

116.4

114.9

110.3

48.2

26.2

23.9

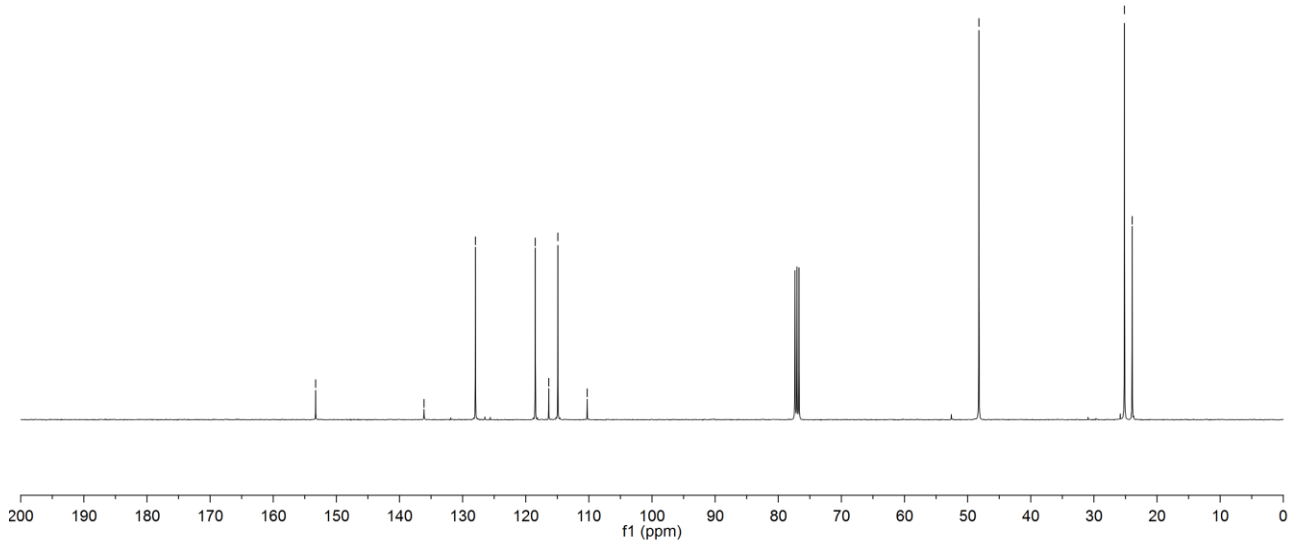

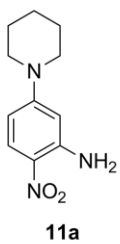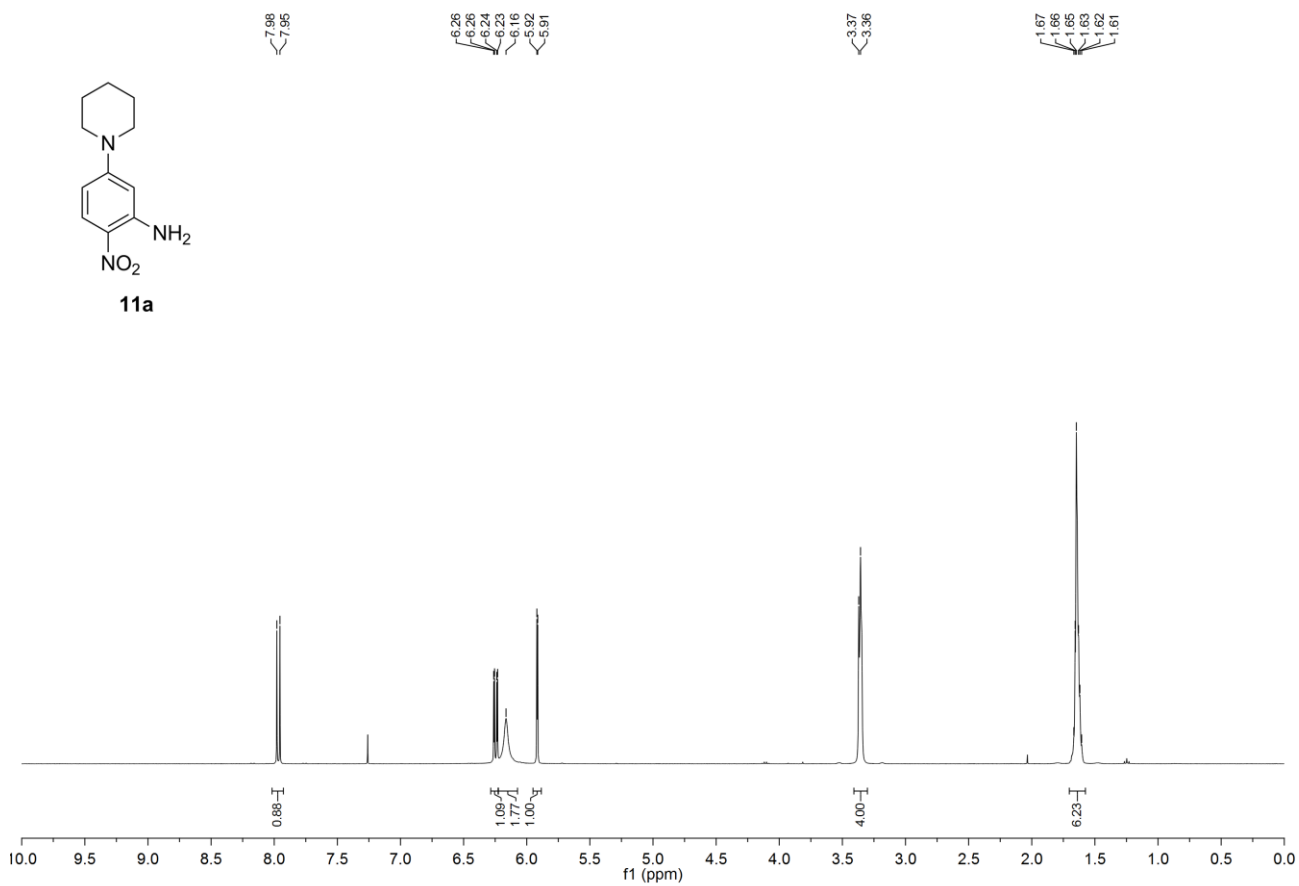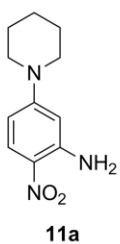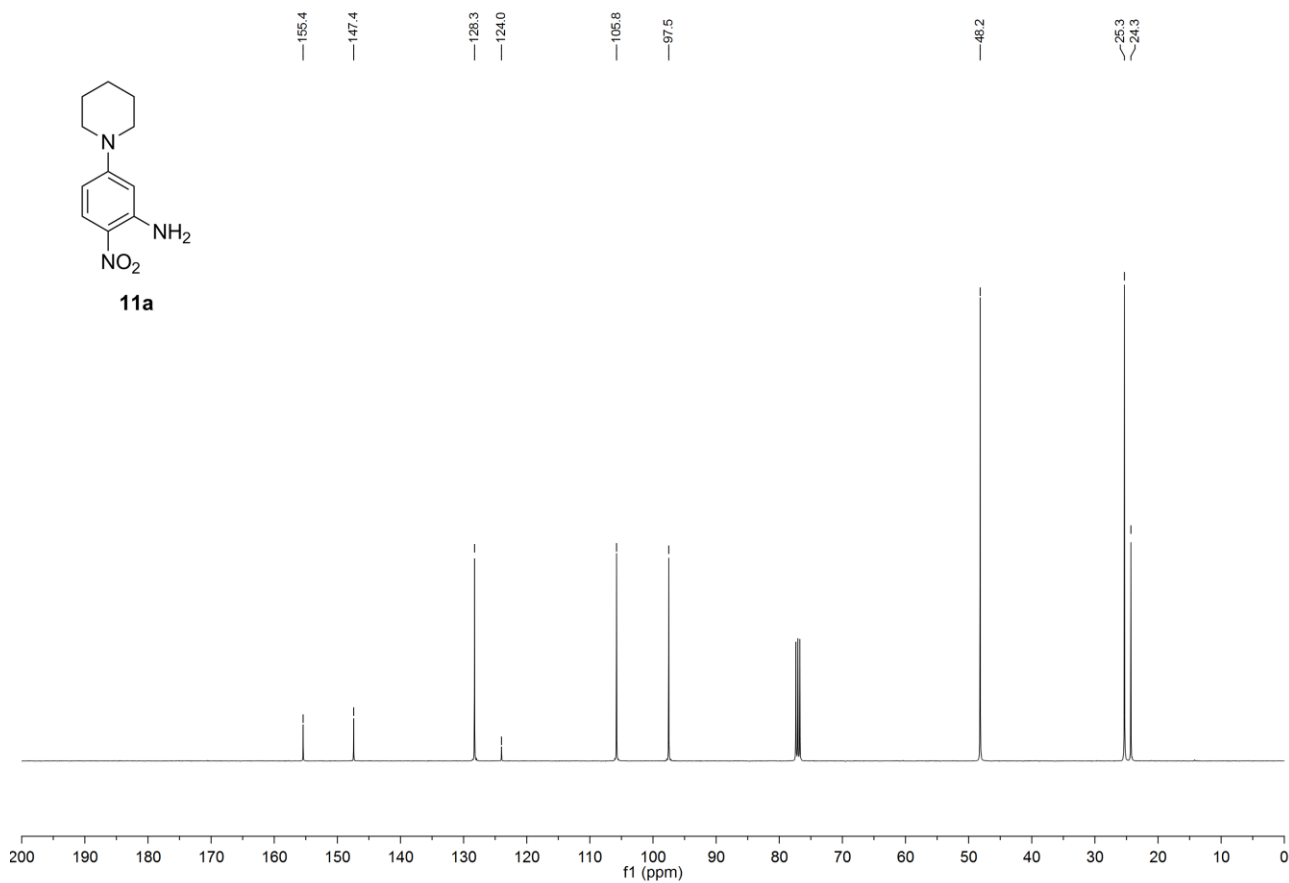

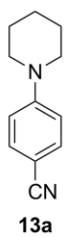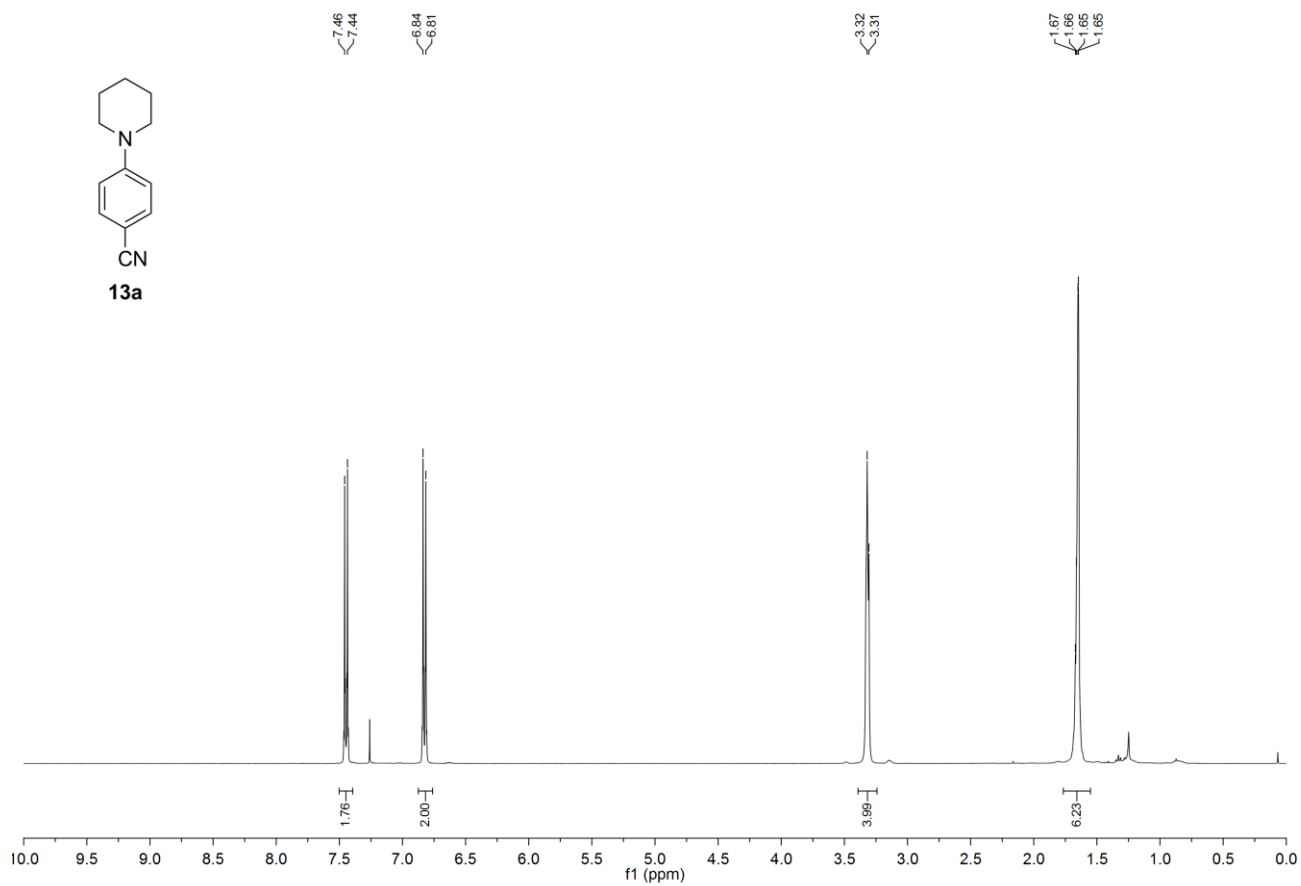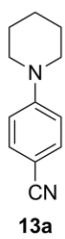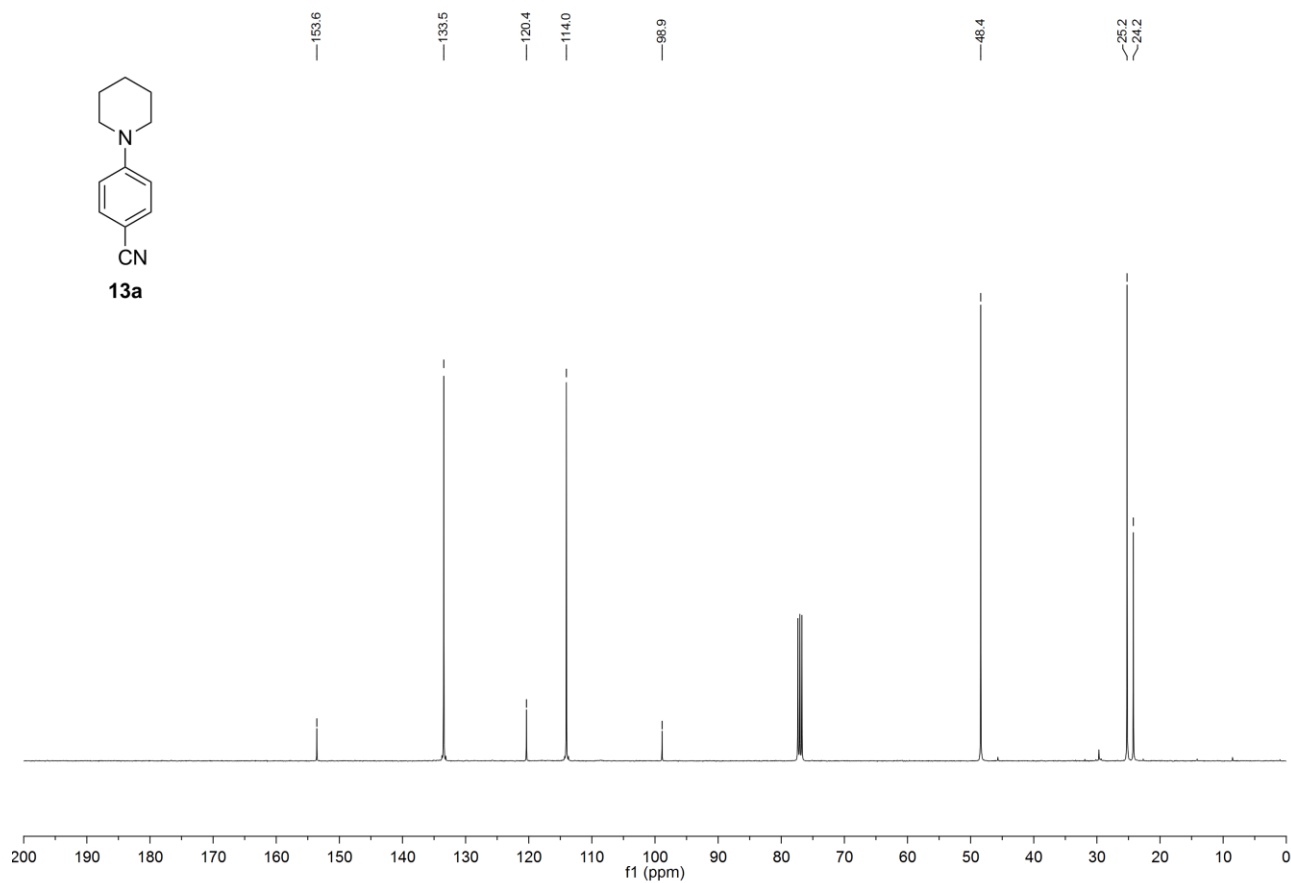

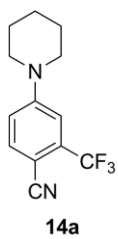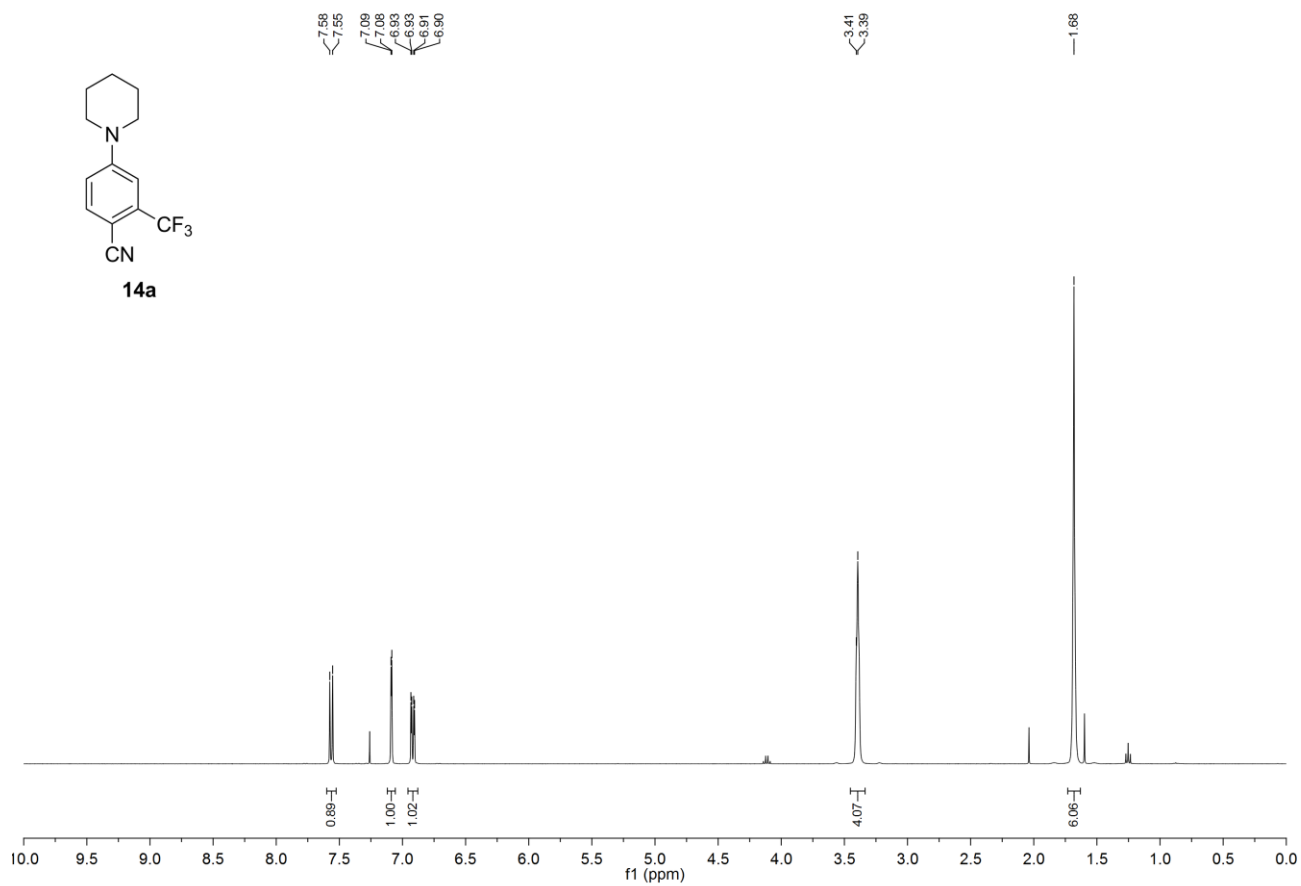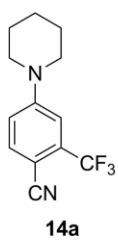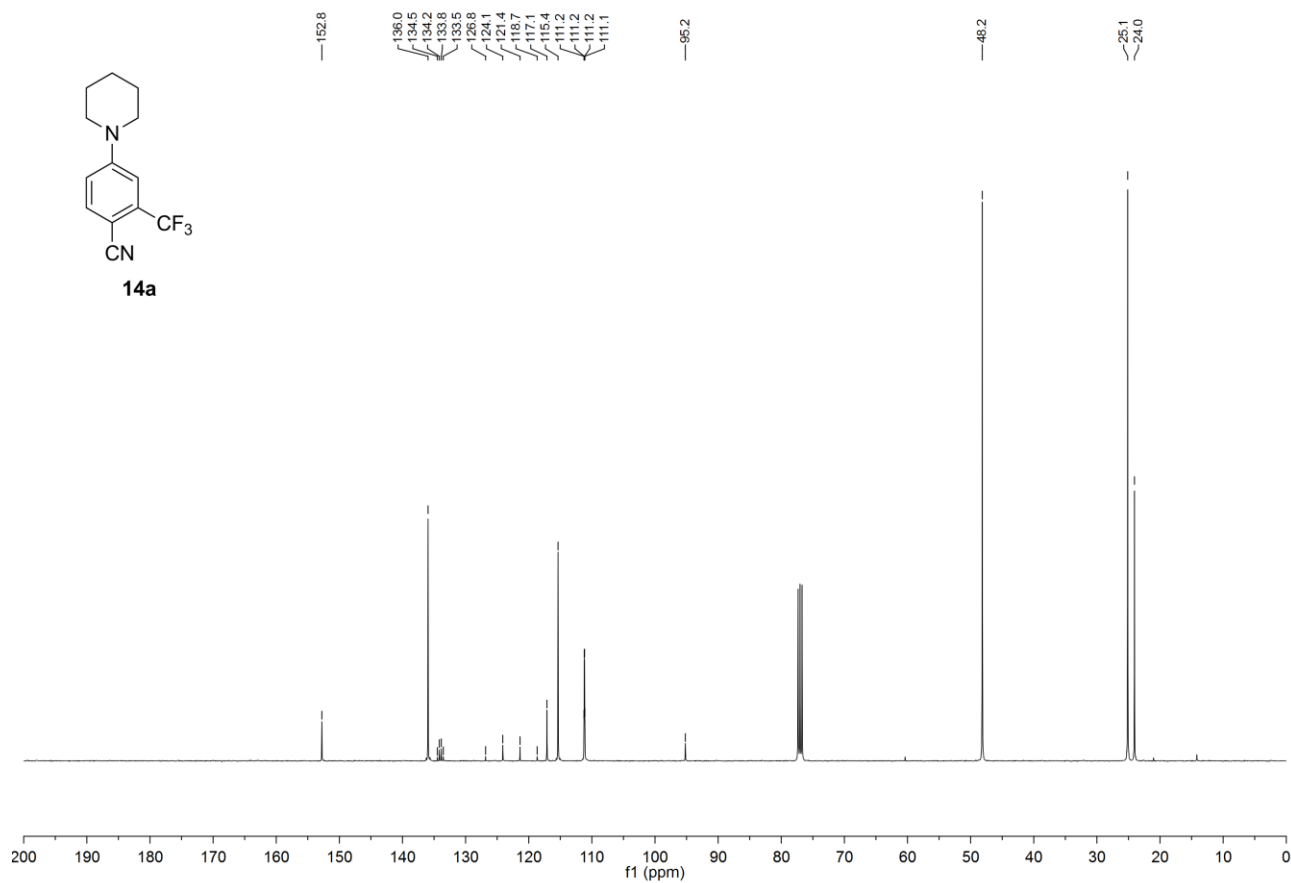

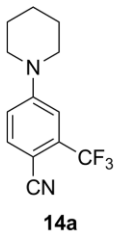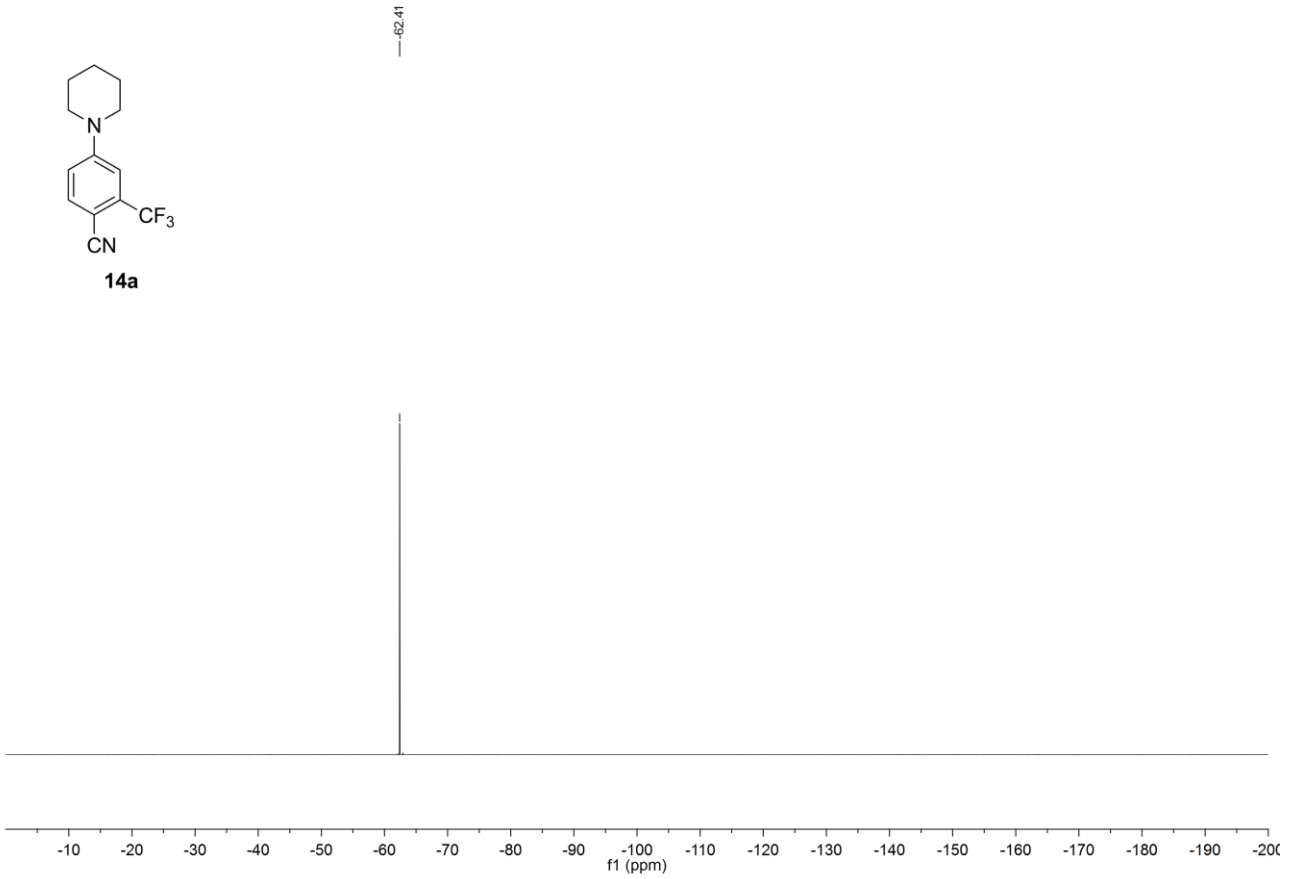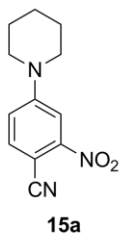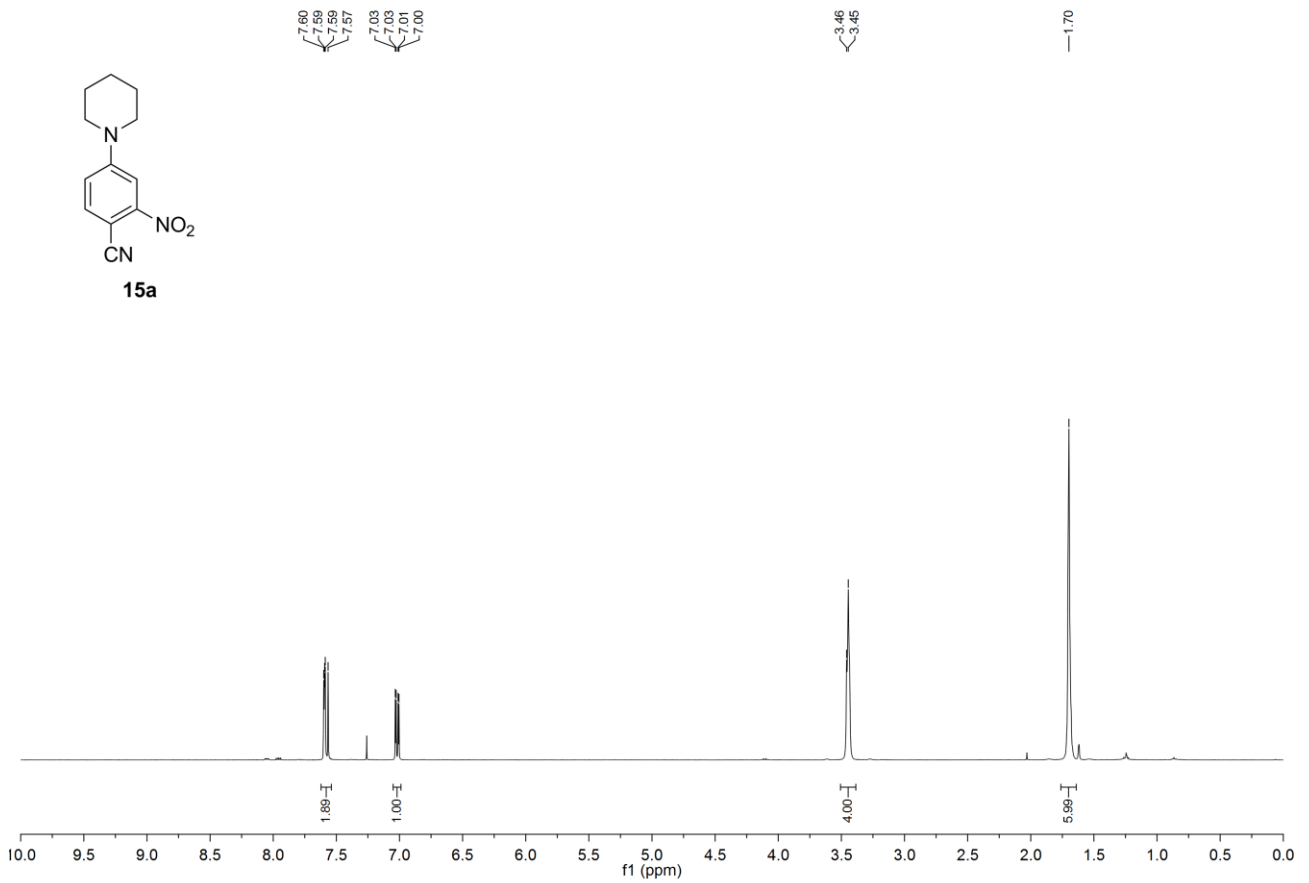

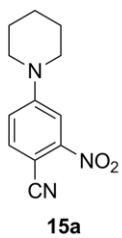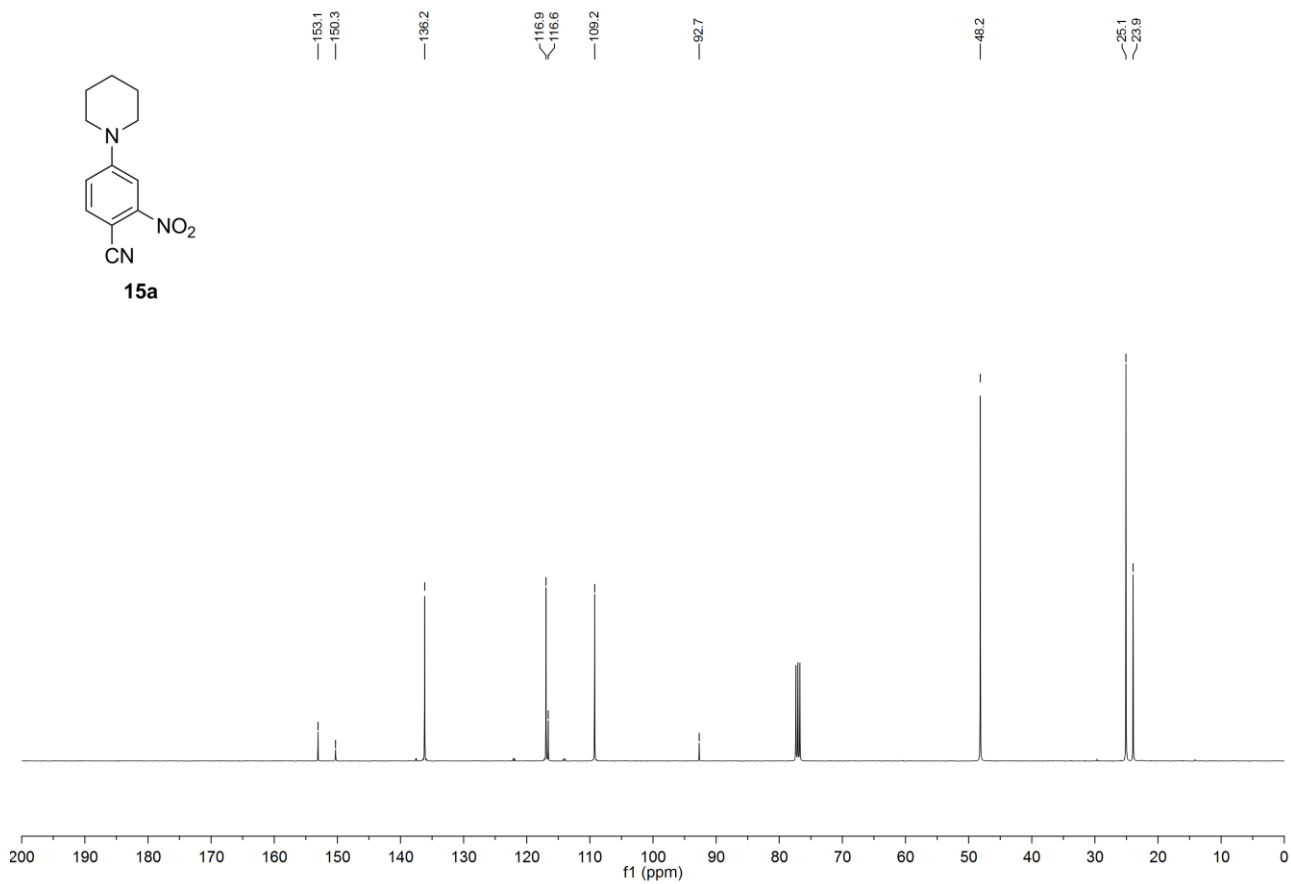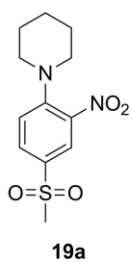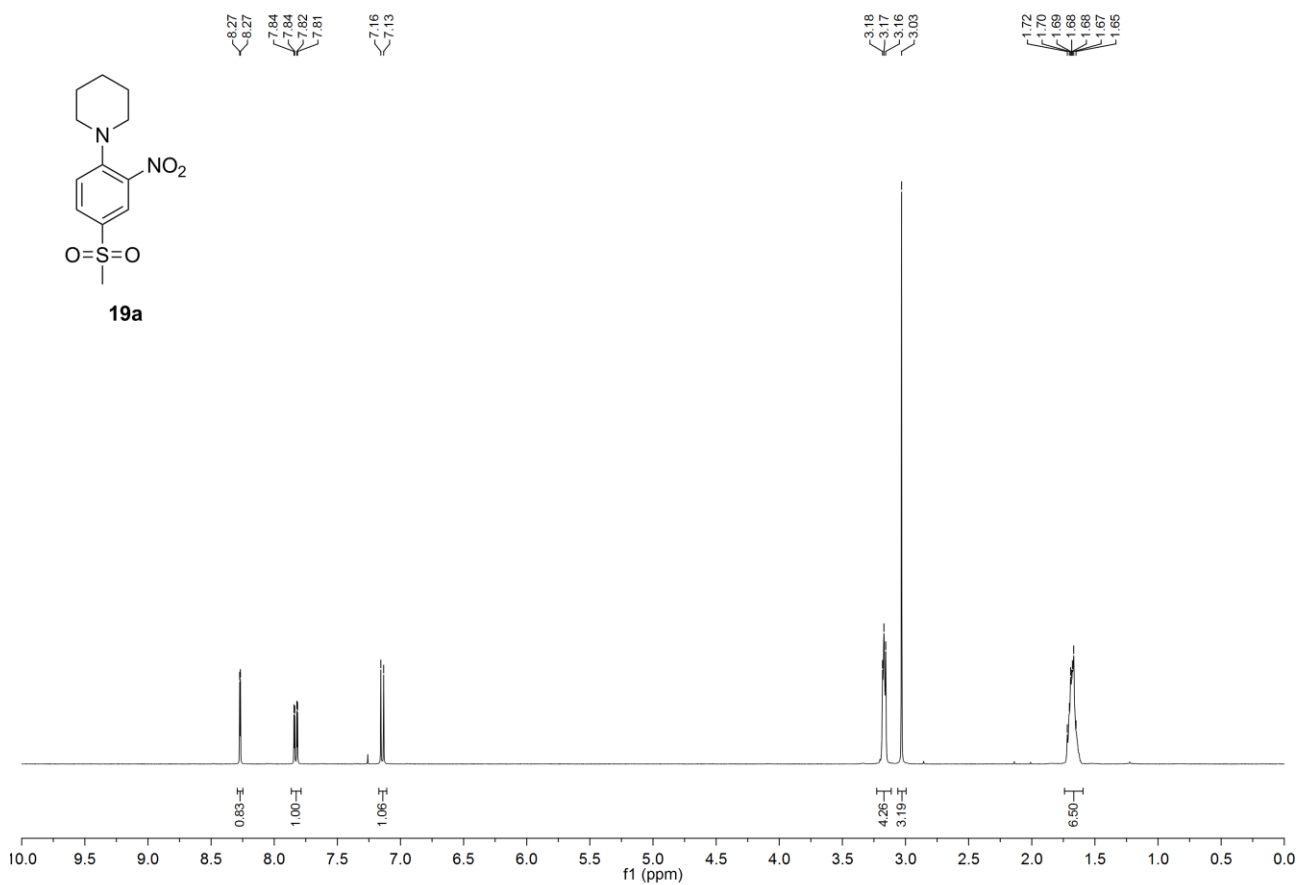

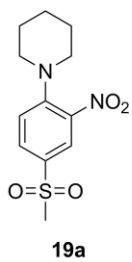

—149.3  
—138.6  
—131.7  
—128.9  
—127.3  
—120.2  
  
—51.8  
—44.7  
—25.4  
—23.6

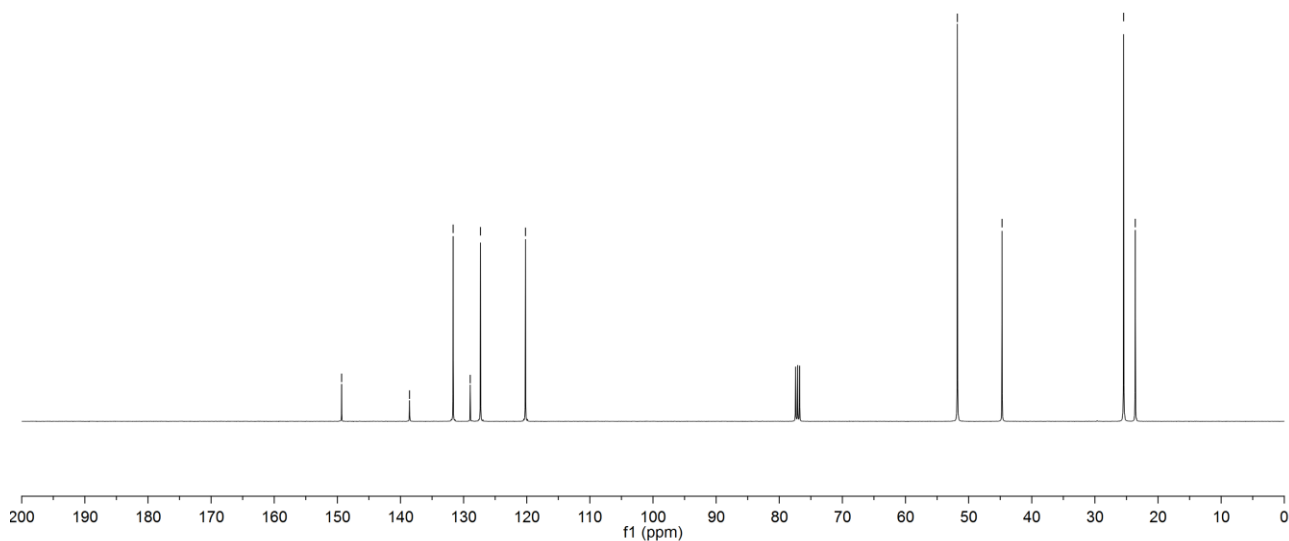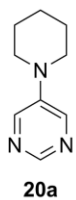

8.21  
8.20  
  
6.34  
6.33  
6.32  
  
3.72  
3.71  
3.70  
  
1.62  
1.61  
1.60  
1.58  
1.57  
1.56  
1.54  
1.52  
1.51  
1.50

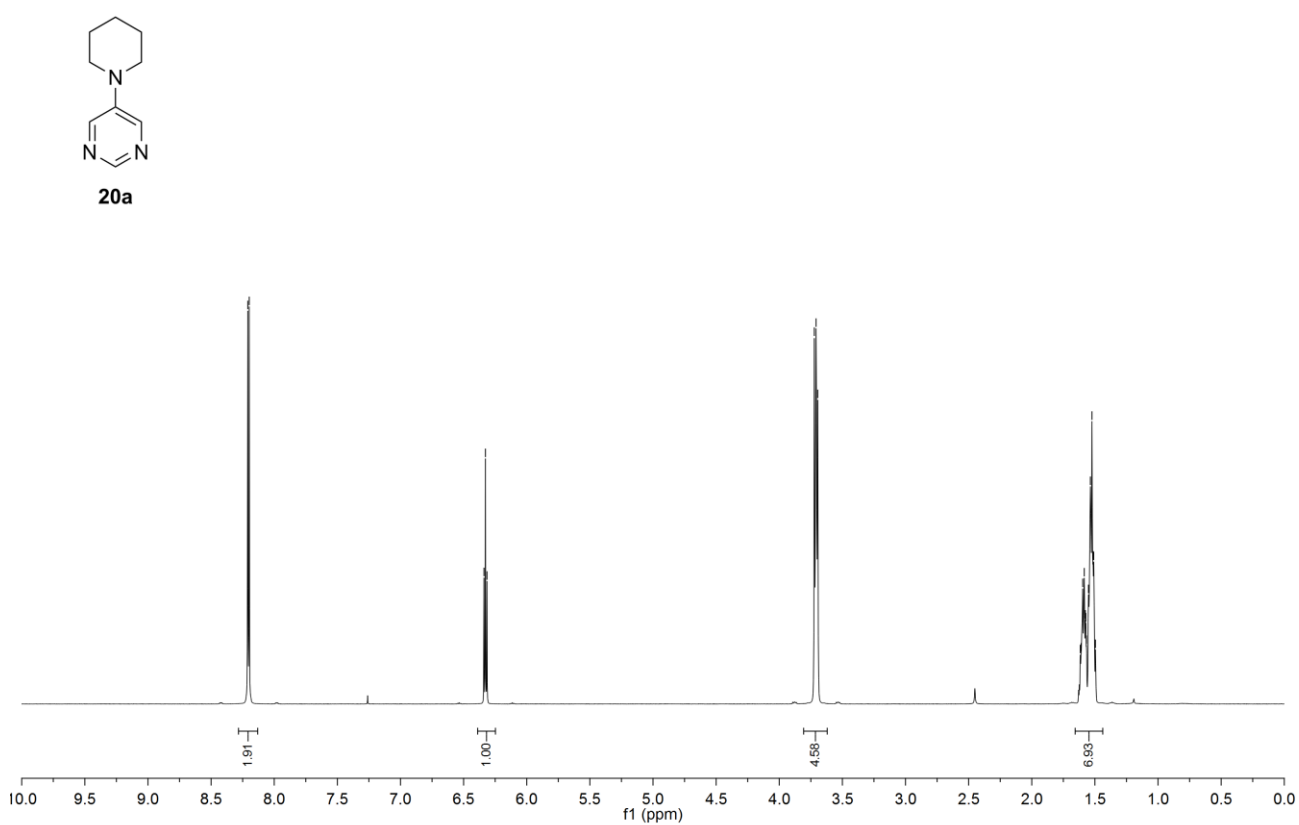



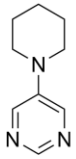

**20a**

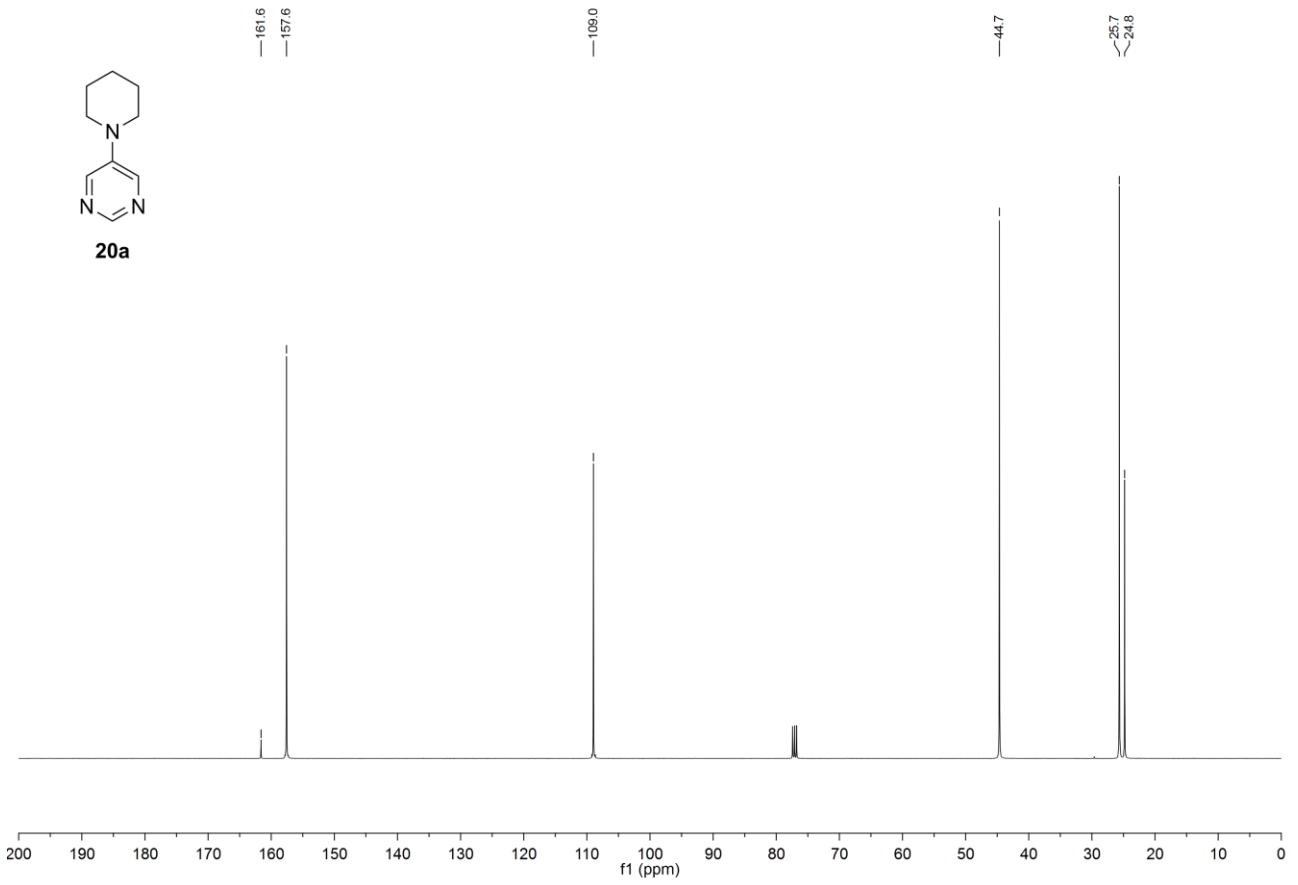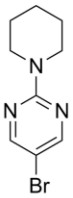

**21a**

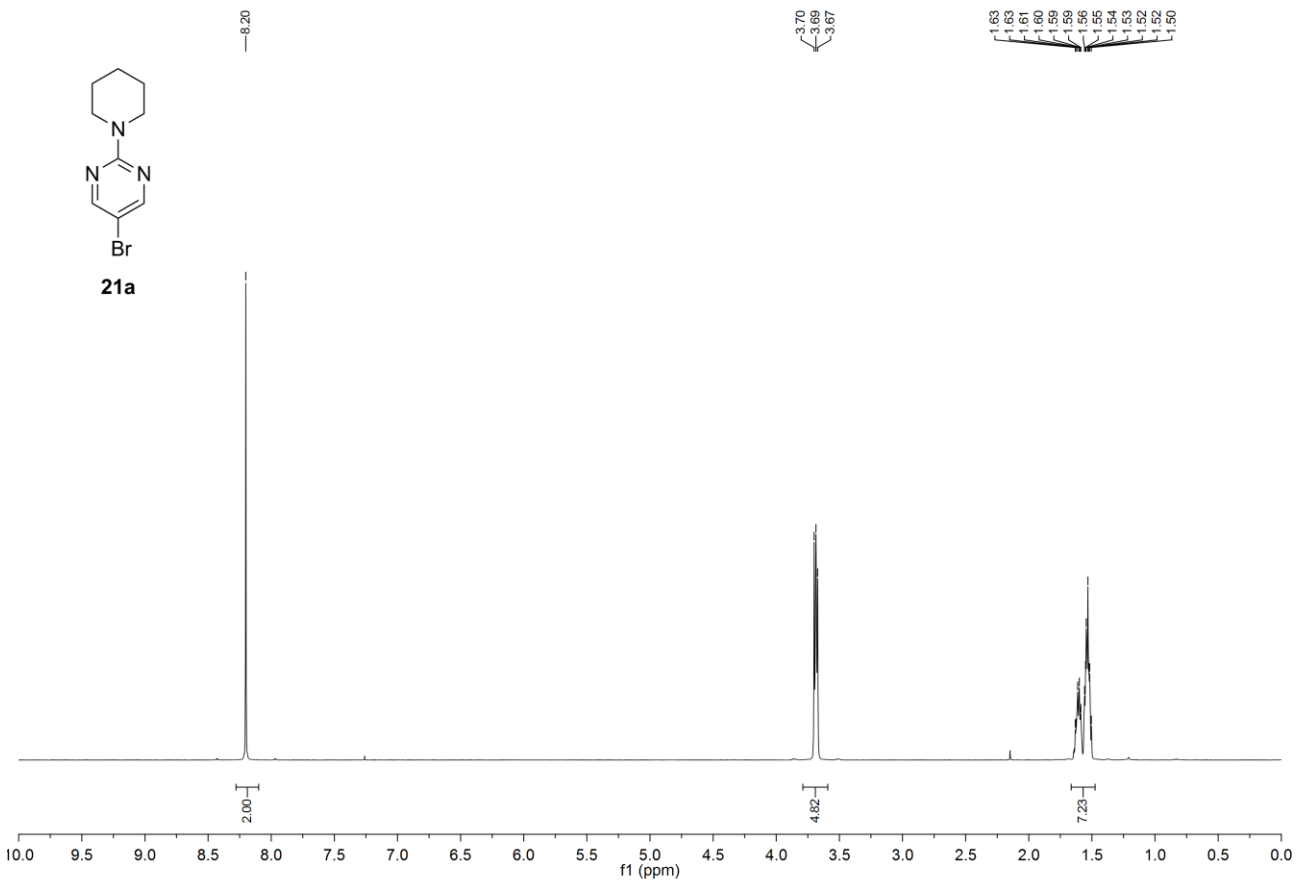

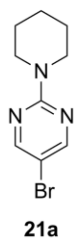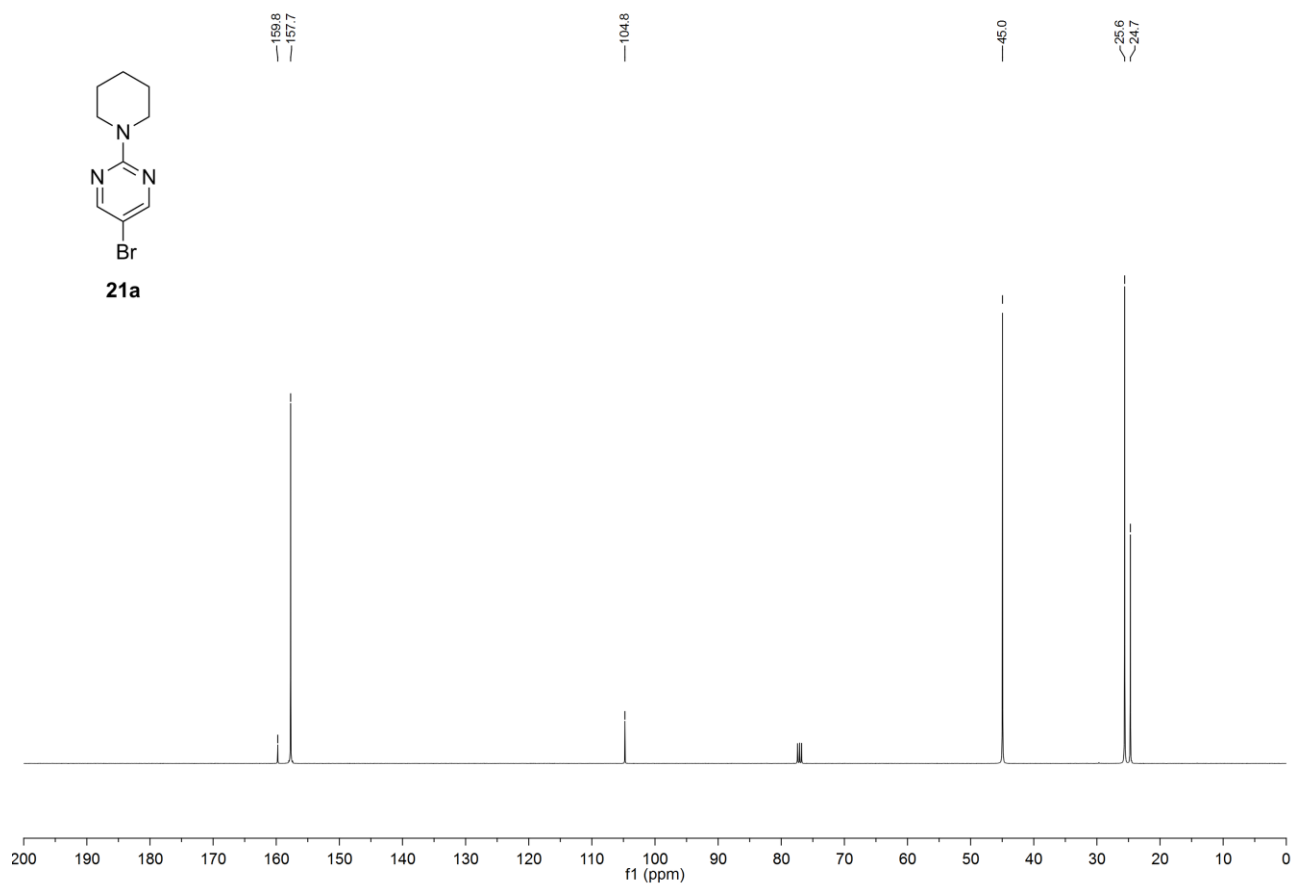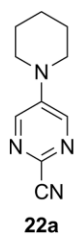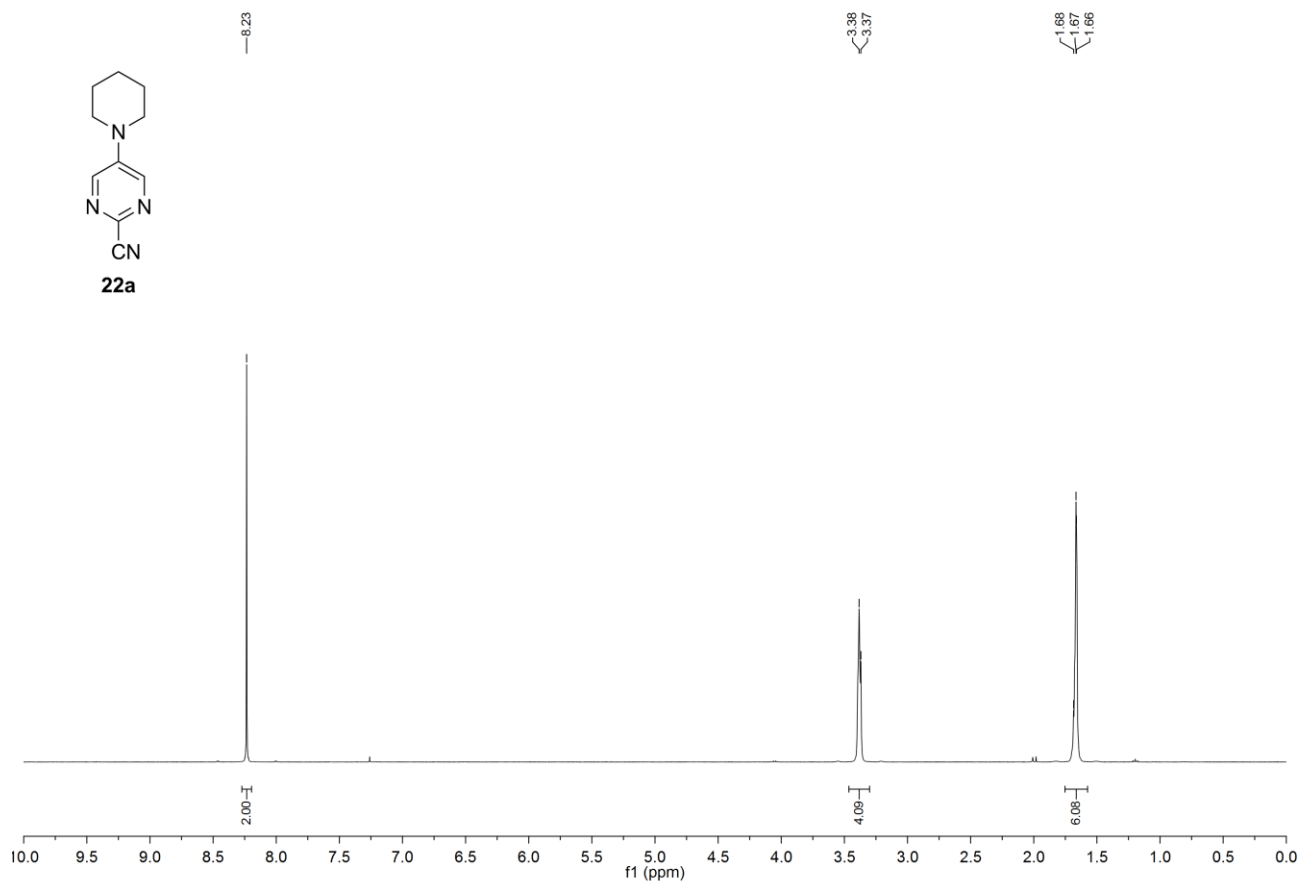

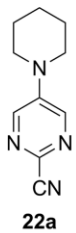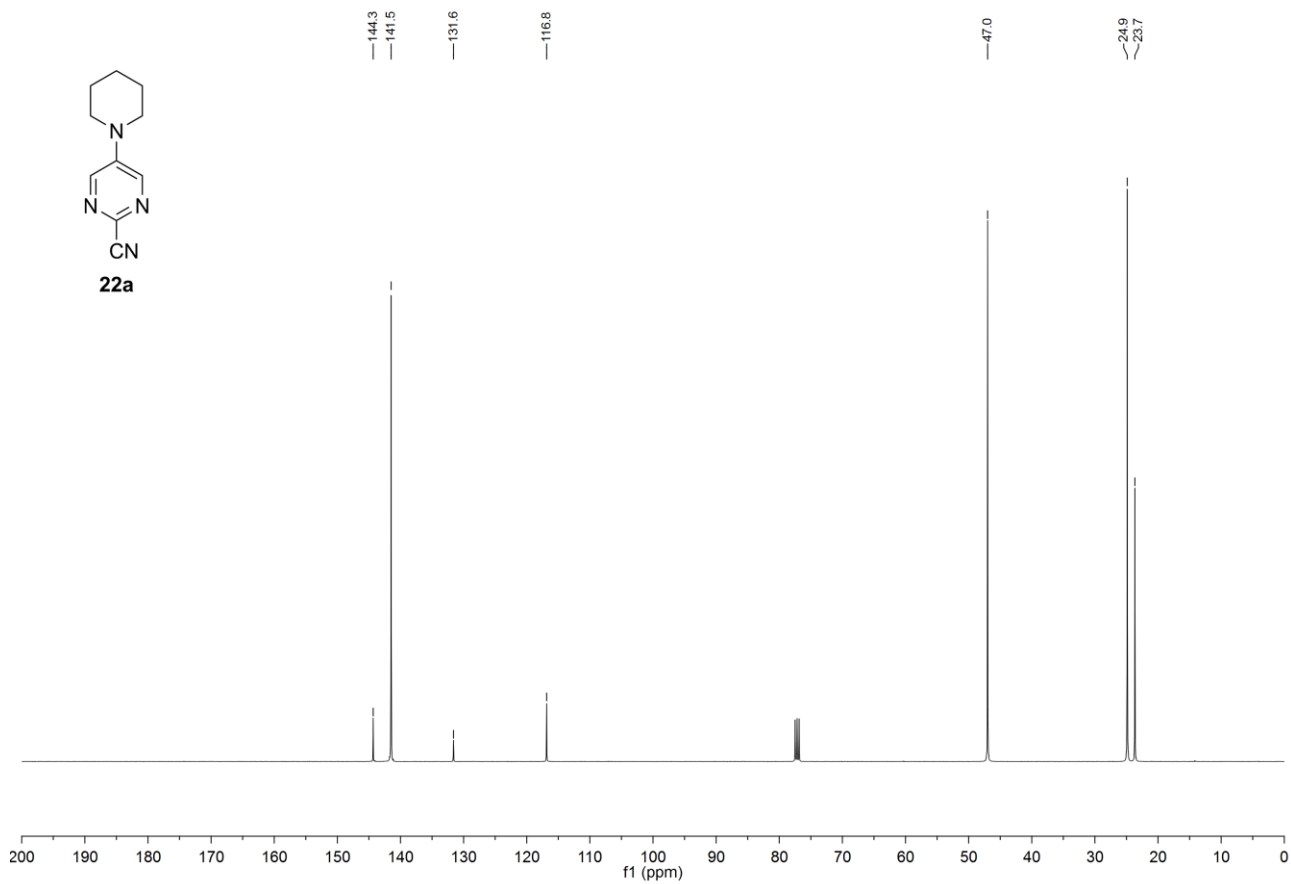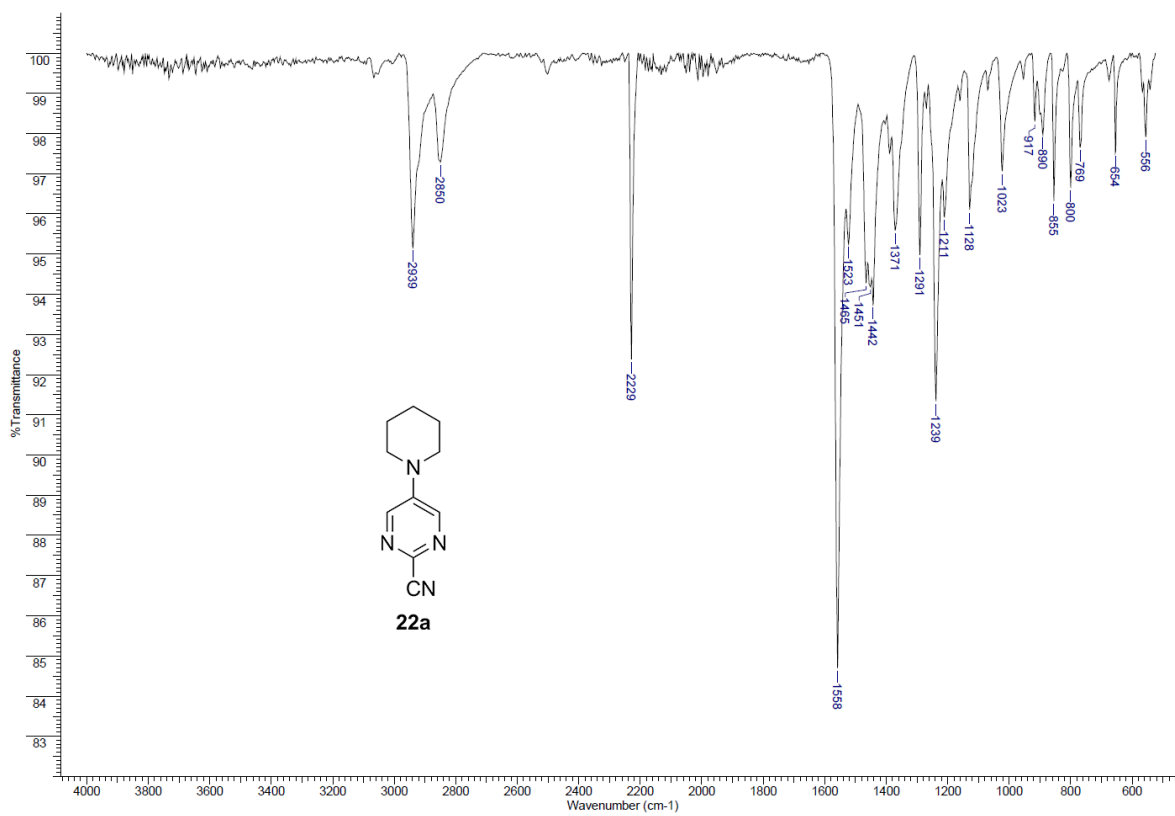

Supplement: d4mr00039k1.pdf [file d4mr00039k1.pdf]
